# Supplementary material
Source: MDPI journal article supplement (https://www.mdpi.com/2073-4344/9/2/153)
Supplement: s1 [file s1]

# Rational Design of Chiral Selenium- $\pi$ -Acid Catalysts

---

F. Krätzschar, S. Ortgies, R. Y. N. Willing, and A. Breder\*

Institut für Organische und Biomolekulare Chemie, Universität Göttingen, Tammannstr. 2,  
D-37077 Göttingen, Germany

## Supporting Information

### Table of Contents

#### 1 Inhalt

|                                   |    |
|-----------------------------------|----|
| General Remarks .....             | 2  |
| Synthetic Procedures.....         | 2  |
| Synthesis of Diselenocines .....  | 2  |
| Asymmetric imidation.....         | 5  |
| Synthesis of alkoxycatalysts..... | 6  |
| Photocatalysts .....              | 21 |
| Asymmetric lactonisation.....     | 22 |
| NMR Spectra .....                 | 24 |
| Diselenocine catalysts .....      | 25 |
| Imidation .....                   | 31 |
| Alkoxy-catalysts .....            | 32 |
| Photocatalysts .....              | 59 |
| Asymmetric lactonization .....    | 63 |
| HPLC Chromatograms .....          | 64 |
| Imidation.....                    | 64 |
| Lactonisation .....               | 71 |

## 2 General Remarks

Chemicals were obtained from commercial sources and were used without further purification. Yields correspond to isolated compounds unless indicated otherwise. Purity is estimated to be  $\geq 95\%$  based on  $^1\text{H}$ -NMR spectroscopic analysis. Irradiation experiments were performed at  $\lambda = 465\text{ nm}$  using commercially available blue LED strips (see experimental setup picture below). The light intensity applied was in the range of 3500-4500 lx. TLC: MACHEREY-NAGEL, TLC plates Alugram® Sil G/UV254. Visualization of the developed chromatogram was performed by fluorescence quenching at 254 nm and staining with potassium permanganate. Chromatography: Separations were carried out on Merck Silica 60 (0.063–0.200 mm, 70–230 mesh ASTM) using forced flow. GPC: Japan Analytical Industries (JAI) LC-92XX II Series, UV- and RI-detector, column: JAIGEL HH series; IR: Bruker FT-IR Alpha-spectrometer and JASCO FT/IR-4600 with ATR sampling module; High resolution mass spectrometry (HR-MS): APEX IV 7T FTICR, BRUKER Daltonic. NMR ( $^1\text{H}$ ,  $^{13}\text{C}$ ,  $^{77}\text{Se}$ ,  $^{11}\text{B}$ ,  $^{31}\text{P}$ ) spectra were recorded at 300, 400, 500 MHz ( $^1\text{H}$ ) and 75, 101, 126 MHz ( $^{13}\text{C}$ , APT (Attached Proton Test)), respectively, on VARIAN Unity-300, AMX 300, Inova 400 and Inova 500 instruments in  $\text{CDCl}_3$  solutions at 298 K, if not specified otherwise. Chemical shifts ( $\delta$ ) are given in ppm. Multiplicity (s = singlet, d = doublet, t = triplet, q = quartet, quint = quintet, sex = sextet, sept = septet, m = multiplet). Melting point: KRÜSS Melting Point Meter M5000; HPLC: Agilent Technologies 1290 Infinity; Kontron A.

## 3 Synthetic Procedures

### 3.1 Synthesis of diselenocines

#### 3.1.1 (11*R*,12*R*)-11,12-Dihydrodibenzo[*c,g*][1,2]diselenocin-11,12-diol (6)<sup>[1]</sup>

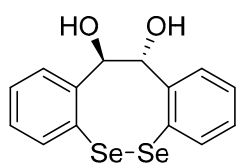

To a suspension of (*R,R*)-hydrobenzoin (**5**) (1.00 g, 4.66 mmol, 1.00 equiv.) in *n*-hexane (25 mL) and Et<sub>2</sub>O (18 mL) *n*-BuLi (1.92 M in hexane, 14.6 mL, 1.79 g, 28.0 mmol, 6.00 equiv.) was added dropwise at rt. The resulting mixture was refluxed for 16 h at 50 °C. After cooling to rt selenium (1.84 g, 23.3 mmol, 5.00 equiv.) and THF (18 mL) were added and the mixture was stirred for further 1.5 h at 50 °C. After cooling to rt the mixture was poured into ice water (100 mL) and stirred for 1 h under air. The phases were separated and the aqueous phase was extracted with DCM (3 x 20 mL). The combined org. phases were washed with H<sub>2</sub>O (3 x 20 mL), dried over Na<sub>2</sub>SO<sub>4</sub> and the solvent was removed under reduced pressure. Column chromatography (SiO<sub>2</sub>, 5:1 PE/EtOAc) provided the title product as a yellow solid (581 mg, 1.57 mmol, 34 %).

**TLC:**  $R_f = 0.19$  (PE/EtOAc, 5:1); **T<sub>m</sub>:** 210-213 °C; **IR** (ATR):  $\tilde{\nu} = 3430, 3236, 2543, 2430, 1441, 1329, 1247, 1191, 1111, 1056, 898, 759, 734, 695\text{ cm}^{-1}$ ;  **$^1\text{H}$ -NMR** (300 MHz, DMSO-*d*<sub>6</sub>):  $\delta$  (ppm) = 7.77 (dd,  $^3J = 7.6\text{ Hz}$ ,  $^4J = 1.3\text{ Hz}$ , 2 H), 7.62 (dd,  $^3J = 7.6\text{ Hz}$ ,  $^4J = 1.6\text{ Hz}$ , 2 H), 7.50 (ddd,  $^3J = 7.6$ ,

7.6 Hz,  $^4J = 1.3$  Hz, 2 H), 7.27 (ddd,  $^3J = 7.6$ , 7.6 Hz,  $^4J = 1.6$  Hz, 2 H), 5.67 (d,  $^3J = 6.6$  Hz, 2 H), 5.22 (d,  $^3J = 6.6$  Hz, 2 H);  $^{13}\text{C-NMR}$  (75 MHz, DMSO- $\text{D}_6$ ):  $\delta$  (ppm) = 152.3, 135.4, 130.0, 127.4, 126.7, 125.0, 73.9;  $^{77}\text{Se NMR}$  (76 MHz, DMSO- $\text{D}_6$ )  $\delta = 461$ ; **HR-MS** (ESI): calc. for  $\text{C}_{14}\text{H}_{12}\text{NaO}_2\text{Se}_2$  ( $[\text{M} + \text{Na}]^+$ ): 394.9063, found: 394.9056; **optical rotation**:  $\alpha_{\text{D}_{20}} = -208^\circ$  ( $c = 1.00$ , MeOH).

### 3.1.2 (3aR,13bR)-2,2-Dimethyl-3a,13b-dihydrodibenzo[3,4:7,8][1,2]diselenocino-[5,6-d][1,3]dioxol (7a) <sup>[2]</sup>

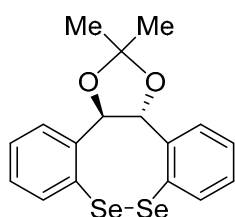

To a suspension of (11R,12R)-11,12-Dihydrodibenzo[*c,g*][1,2]diselenocino-11,12-diol (**6**) (595 mg, 1.61 mmol, 1.00 equiv.) in 2,2-dimethoxypropane (1.98 mL, 1.68 g, 16.1 mmol, 10.0 equiv.) a drop of aq. HCl (37%) was added and the resulting mixture was stirred for 16 h at rt. One drop of  $\text{NEt}_3$  was added and the solvent was evaporated. The residue was dissolved in  $\text{CHCl}_3$  (10 mL), filtered through celite and the solvent was removed under reduced pressure. Column chromatography ( $\text{SiO}_2$ , 50:1 PE/ $\text{Et}_2\text{O}$ ) provided the title product as a yellow solid (427 mg, 1.04 mmol, 65 %).

**TLC**:  $R_f = 0.13$  (PE/ $\text{Et}_2\text{O}$ , 50:1); **T<sub>m</sub>**: 106-109 °C; **IR** (ATR):  $\tilde{\nu} = 3047, 2979, 1454, 1369, 1240, 1205, 1061, 1025, 872, 753\text{ cm}^{-1}$ ;  $^1\text{H-NMR}$  (300 MHz,  $\text{CDCl}_3$ ):  $\delta$  (ppm) = 7.85 (dd,  $^3J = 7.8$  Hz,  $^4J = 1.5$  Hz, 2 H), 7.72 (dd,  $^3J = 7.5$  Hz,  $^4J = 1.4$  Hz, 2 H), 7.42 (ddd,  $^3J = 7.8, 7.5$  Hz,  $^3J = 1.4$  Hz, 2 H), 7.19 (ddd,  $^3J = 7.5, 7.5$  Hz,  $^3J = 1.5$  Hz, 2 H), 5.85 (s, 2 H), 1.75 (s, 6 H);  $^{13}\text{C-NMR}$  (75 MHz,  $\text{CDCl}_3$ ):  $\delta$  (ppm) = 148.2, 136.2, 130.3, 129.6, 127.8, 127.6, 111.6, 84.7, 28.3;  $^{77}\text{Se NMR}$  (76 MHz,  $\text{CDCl}_3$ )  $\delta = 472.95$ ; **HR-MS** (ESI): calc. for  $\text{C}_{17}\text{H}_{16}\text{NaO}_2\text{Se}_2$  ( $[\text{M} + \text{Na}]^+$ ): 434.9376, found: 434.9367; **optical rotation**:  $\alpha_{\text{D}_{20}} = -100^\circ$  ( $c = 1.00$ ,  $\text{CHCl}_3$ ).

### 3.1.3 (11R,12R)-11,12-Dihydrodibenzo[*c,g*][1,2]diselenocino-11,12-diylidibenzoat (7d) <sup>[3]</sup>

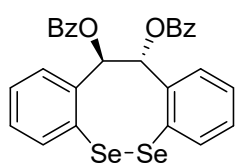

To a solution of (11R,12R)-11,12-dihydrodibenzo[*c,g*][1,2]diselenocino-11,12-diol (**6**) (50 mg, 0.14 mmol, 1.0 equiv.) and DMAP (1.6 mg, 14  $\mu\text{mol}$ , 0.10 equiv.) in pyridine (1.5 mL), benzoyl chloride (156  $\mu\text{L}$ , 190 mg, 1.35 mmol, 10.0 equiv.) was added at 0 °C. The solution was warmed to 40 °C and stirred for 24 h. Sat. aq.  $\text{NaHCO}_3$ -sol. (2.5 mL) was added and the solution was extracted with DCM (3 x 5 mL). The combined org. phases were dried over  $\text{Na}_2\text{SO}_4$  and the solvent was removed under reduced pressure. Column chromatography (PE/ $\text{EtOAc}$ , 10:1) provided the title product as a yellow solid (36 mg, 62  $\mu\text{mol}$ , 46 %).

**TLC**:  $R_f = 0.49$  (PE/ $\text{EtOAc}$ , 10:1); **T<sub>m</sub>**: 180-185 °C; **IR** (ATR):  $\tilde{\nu} = 3060, 1722, 1451, 1246, 1094, 1068, 1025, 761, 706\text{ cm}^{-1}$ ;  $^1\text{H-NMR}$  (300 MHz,  $\text{CDCl}_3$ ):  $\delta$  (ppm) = 8.20 (d,  $^3J = 7.6$  Hz, 4 H), 7.85 (d,  $^3J = 7.5$  Hz, 2 H), 7.16-7.67 (m, 12 H), 7.09 (s, 2 H);  $^{13}\text{C-NMR}$  (125 MHz,  $\text{CDCl}_3$ ):  $\delta$  (ppm) = 164.9, 147.1, 136.4, 133.4, 130.2, 129.9, 129.7, 128.6, 128.5, 128.4, 128.3, 127.6, 124.8, 76.1; **HR-**

**MS** (ESI): calc. for  $C_{28}H_{20}NaO_4Se_2$  ( $[M + Na]^+$ ): 602.9590, found: 602.9525; **optical rotation**:  $\alpha^{D_{20}} = +135^\circ$  ( $c = 1.00$ ,  $CHCl_3$ ).

### 3.1.4 (11*R*,12*R*)-11,12-Dihydrodibenzo[*c,g*][1,2]diselenocin-11,12-diylbis(2,2-dimethylpropanoat) (7b)<sup>[3]</sup>

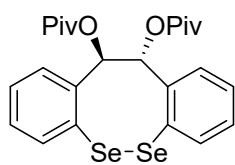

To a solution of (11*R*,12*R*)-11,12-dihydrodibenzo[*c,g*][1,2]diselenocin-11,12-diol (**6**) (70 mg, 0.19 mmol, 1.00 equiv.) and DMAP (1.6 mg, 14  $\mu$ mol, 0.10 equiv.) in pyridine (1.5 mL), pivaloyl chloride (228 mg, 1.89 mmol, 10.0 equiv.) was added at 0 °C. The solution was warmed to 40 °C and stirred for 24 h. Sat. aq.  $NaHCO_3$ -sol. (2.5 mL) was added and the solution was extracted with DCM (3  $\times$  5 mL). The combined org. phases were dried over  $Na_2SO_4$  and the solvent was removed under reduced pressure. Column chromatography (PE/EtOAc, 10:1) provided the title product as a yellow solid (100 mg, 186  $\mu$ mol, 98 %).

**TLC**:  $R_f = 0.37$  (PE/EtOAc, 10:1); **T<sub>m</sub>**: 140-150 °C (decomposition); **IR** (ATR):  $\tilde{\nu} = 2973, 1734, 1278, 1129, 1114, 1038, 759, 735, 448\text{ cm}^{-1}$ ; **<sup>1</sup>H-NMR** (300 MHz,  $CDCl_3$ ):  $\delta$  (ppm) = 7.80 (dd,  $^3J = 7.6\text{ Hz}$ ,  $^4J = 1.3\text{ Hz}$ , 2 H), 7.16-7.40 (m, 6 H), 6.71 (s, 2 H), 1.31 (s, 18 H); **<sup>13</sup>C-NMR** (125 MHz,  $CDCl_3$ ):  $\delta$  (ppm) = 176.7, 147.5, 136.4, 130.1, 128.3, 128.2, 123.4, 75.6, 39.1, 27.4; **HR-MS** (ESI): calc. for  $C_{24}H_{32}NO_4Se_2$  ( $[M+NH_4]^+$ ): 558.0661, found: 558.0630; **optical rotation**:  $\alpha^{D_{20}} = +3^\circ$  ( $c = 1.00$ ,  $CHCl_3$ ).

### 3.1.5 (3*aR*,13*bR*)-3*a*,13*b*-Dihydrodibenzo[3,4:7,8][1,2]diselenocino[5,6-*d*][1,3]dioxol-2-one (7c)<sup>[4]</sup>

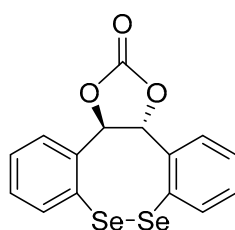

To a solution of (11*R*,12*R*)-11,12-Dihydrodibenzo[*c,g*][1,2]diselenocin-11,12-diol (**6**) (50 mg, 0.14 mmol, 1.0 equiv.) in DCM (1 mL) bis(trichlormethyl) carbonate (44 mg, 0.15 mmol, 1.1 equiv.) and  $NEt_3$  (41  $\mu$ L, 30 mg, 300  $\mu$ mol, 2.30 equiv.) were added and the resulting mixture was stirred for 2 h at RT.  $H_2O$  (2 mL) was added and the mixture was extracted with DCM (3  $\times$  5 mL). The combined org. phases were dried

over  $Na_2SO_4$  and the solvent was removed under reduced pressure. Column chromatography (PE/EtOAc, 10:1) provided the title product as a yellow solid (32 mg, 81  $\mu$ mol, 60 %).

**TLC**:  $R_f = 0.39$  (PE/EtOAc, 10:1); **T<sub>m</sub>**: 245-252 °C (decomposition); **IR** (ATR):  $\tilde{\nu} = 3051, 2922, 1822, 1798, 1143, 1067, 989, 744, 449\text{ cm}^{-1}$ ; **<sup>1</sup>H-NMR** (300 MHz,  $CDCl_3$ ):  $\delta$  (ppm) = 7.81 (m, 2 H), 7.50-7.54 (m, 4 H), 7.34 (m, 2 H), 6.21 (s, 2 H); **<sup>13</sup>C-NMR** (125 MHz,  $CDCl_3$ ):  $\delta$  (ppm) = 154.8, 143.8, 136.9, 130.7, 129.3, 128.1, 124.4, 82.4; **<sup>77</sup>Se NMR** (76 MHz,  $CDCl_3$ )  $\delta$  (ppm) = 465.16; **HR-MS** (ESI): calc for  $C_{15}H_{14}NO_3Se_2$  ( $[M+NH_4]^+$ ): 415.9302, found.: 415.9281; **optical rotation**:  $\alpha^{D_{20}} = -430^\circ$  ( $c = 1.00$ ,  $CHCl_3$ ).

## 3.2 Asymmetric imidation

### 3.2.1 (*E*)-Benzyl-4-(*N*-(phenylsulfonyl)phenylsulfonamid)pent-2-enoat (**3**)<sup>[5]</sup>

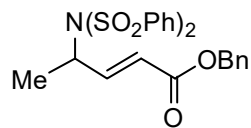

To a solution of (*E*)-benzylpent-3-enoate (**1**) (50 mg, 0.26 mmol, 1.00 equiv.), NFSI (**2**) (83 mg, 260  $\mu$ mol, 1.0 equiv.), and 4 Å molecular sieves (spatula tip) in the corresponding solvent (1.5 mL), the catalyst (13  $\mu$ mol, 5 mol%) was added. The resulting suspension was stirred for 16 h at rt. The solvent was removed under reduced pressure and column chromatography (SiO<sub>2</sub>, 10:1  $\rightarrow$  3:1 PE/Et<sub>2</sub>O) provided the title product as a colorless solid.

**Table 1: Conditions used in the asymmetric imidation**

| entry | solvent           | catalyst  | m (product) | n (product)   | yield | <i>ee</i> |
|-------|-------------------|-----------|-------------|---------------|-------|-----------|
| 1     | THF               | <b>7a</b> | 37 mg       | 76 $\mu$ mol  | 29 %  | 19 %      |
| 2     | 1,4-dioxane       | <b>7a</b> | 22 mg       | 45 $\mu$ mol  | 17 %  | 15 %      |
| 3     | DCM               | <b>7a</b> | 23 mg       | 47 $\mu$ mol  | 18 %  | 18 %      |
| 4     | MeNO <sub>2</sub> | <b>7a</b> | 20 mg       | 42 $\mu$ mol  | 16 %  | 8 %       |
| 5     | MeCN              | <b>7a</b> | 64 mg       | 0.13 mmol     | 50 %  | 3 %       |
| 6     | Toluol            | <b>7a</b> | 20 mg       | 42 $\mu$ mol  | 16 %  | 14 %      |
| 7     | THF/MeCN (9:1)    | <b>7a</b> | 47 mg       | 97 $\mu$ mol  | 37 %  | 7 %       |
| 8     | MTBE              | <b>7a</b> | 36 mg       | 74 $\mu$ mol  | 28 %  | 16 %      |
| 9     | Et <sub>2</sub> O | <b>7a</b> | 34 mg       | 71 $\mu$ mol  | 27 %  | 14 %      |
| 10    | cyclohexane       | <b>7a</b> | -           | -             | 0 %   | -         |
| 11    | THF               | <b>7d</b> | 66 mg       | 0.14 mmol     | 52 %  | 16 %      |
| 12    | THF               | <b>7d</b> | 63 mg       | 0.13 mmol     | 49 %  | 8 %       |
| 13    | THF               | <b>7c</b> | 103 mg      | 213 $\mu$ mol | 81 %  | 50 %      |

**TLC:**  $R_f$  = 0.11 (PE/ Et<sub>2</sub>O, 3:1); **IR** (ATR):  $\tilde{\nu}$  = 3067, 2937, 1721, 1448, 1377, 1354, 1084, 1165, 850, 720, 684, 546 cm<sup>-1</sup>; **<sup>1</sup>H-NMR** (300 MHz, CDCl<sub>3</sub>):  $\delta$  (ppm) = 7.93-8.12 (m, 4 H), 7.61 (m, 2 H), 7.45-7.57 (m, 4 H), 7.29-7.44 (m, 5 H), 7.00 (dd, <sup>3</sup>*J* = 15.9 Hz, 5.6 Hz, 1 H), 5.79 (dd, <sup>3</sup>*J* = 15.9 Hz, <sup>4</sup>*J* = 1.8 Hz, 1 H), 4.91 (qdd, <sup>3</sup>*J* = 7.0, 5.6 Hz, <sup>4</sup>*J* = 1.8 Hz, 1 H), 5.17 (s, 2 H), 1.54 (d, <sup>3</sup>*J* = 6.9 Hz, 3

H); **<sup>13</sup>C-NMR** (125 MHz, CDCl<sub>3</sub>): δ (ppm) = 18.8, 58.1, 66.4, 122.8, 128.3, 128.5, 128.6, 128.9, 129.0, 133.9, 135.7, 139.9, 146.0, 165.3; **HR-MS** (ESI): calc. for C<sub>24</sub>H<sub>23</sub>NO<sub>6</sub>S<sub>2</sub> ([M+H]<sup>+</sup>): 486.1040, found: 486.1038; **HPLC**: 22.734 min., 25.738 min. (Daicel Chiralpak IA; eluent *n*-hexane/*i*-PrOH, 90:10; flow rate: 0.8 mL/min.).

### 3.3 Synthesis of alkoxycatalysts

#### 3.3.1 1-(((1*R*,2*S*,5*R*)-2-Isopropyl-5-methylcyclohexyl)oxy)-2-nitrobenzene <sup>[6]</sup>

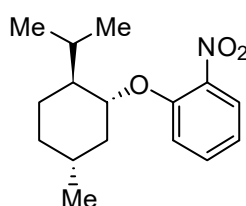

Sodium hydride (60 w% in mineral oil, 1.91 g, 47.7 mmol, 1.50 equiv.) was suspended in dry THF (20 mL) under argon-atmosphere at 0 °C, treated with 2-fluoronitrobenzene (3.00 g, 21.0 mmol, 1.00 equiv.). A solution of (–)-menthol (4.98 g, 31.8 mmol, 1.50 equiv.) in dry THF (16 mL) was slowly added, and the mixture was allowed to warm to rt and stirred for 16 h at 60 °C. After cooling to rt, sat. aq. NH<sub>4</sub>Cl-sol. (45 mL) was added, the aqueous phase was extracted with DCM (3 x 25 mL), the combined organic phases were dried over Na<sub>2</sub>SO<sub>4</sub> and the solvent was removed under reduced pressure. Column chromatography (SiO<sub>2</sub>, 20:1 pentane/DCM) provided the title product as a yellow solid (4.48 g, 16.0 mmol, 76%).

**TLC**: *R<sub>f</sub>* = 0.71 (pentane/EtOAc: 30:1); **IR** (neat):  $\tilde{\nu}$  = 2953, 2929, 2870, 2360, 1602, 1524, 1485, 1456, 1355, 1277, 1256, 1163, 984, 851, 747, 669 cm<sup>-1</sup>; **<sup>1</sup>H-NMR** (300 MHz, CDCl<sub>3</sub>): δ (ppm) = 7.78 (dd, <sup>3</sup>*J* = 8.1 Hz, <sup>4</sup>*J* = 1.7 Hz, 1 H), 7.49 (ddd, <sup>3</sup>*J* = 8.5, 7.4, <sup>4</sup>*J* = 1.8 Hz, 1 H), 7.10 (dt, <sup>3</sup>*J* = 8.5, <sup>4</sup>*J* = 0.9 Hz, 1 H), 6.98 (ddd, <sup>3</sup>*J* = 8.1, 7.4, <sup>4</sup>*J* = 1.2 Hz, 1 H), 4.22 (td, <sup>3</sup>*J* = 10.6, 4.2, 1 H), 2.30-2.18 (m, 1 H), 2.18-2.10 (m, 1 H), 1.76 (ddt, <sup>3</sup>*J* = 11.5, 4.9 Hz, <sup>4</sup>*J* = 2.8 Hz, 2 H), 1.63 (ddt, <sup>3</sup>*J* = 13.3, 10.2 Hz, <sup>4</sup>*J* = 3.2 Hz, 1 H), 1.50 (tdd, <sup>3</sup>*J* = 12.0, 6.5 Hz, <sup>4</sup>*J* = 3.3 Hz, 1 H), 1.3-1.2 (m, 2 H), 0.95 (dd, <sup>3</sup>*J* = 6.8, 1.3 Hz, 6 H), 0.77 (d, <sup>3</sup>*J* = 7.0 Hz, 3 H); **<sup>13</sup>C-NMR** (75 MHz, CDCl<sub>3</sub>): δ (ppm) = 151.6, 133.6, 125.5, 119.6, 115.1, 79.3, 47.6, 39.7, 34.2, 31.5, 25.8, 23.5, 22.0, 20.7, 16.4; **HR-MS** (ESI): calc. for: C<sub>16</sub>H<sub>23</sub>NO<sub>3</sub>Na ([M+Na]<sup>+</sup>): 300.1570 found: 300.1572; **optical rotation**  $\alpha^{D_{20}}$  = –87° (c = 0.52, CHCl<sub>3</sub>).

### 3.3.2 2-(((1R,2S,5R)-2-Isopropyl-5-methylcyclohexyl)oxy)aniline (9b)<sup>[7]</sup>

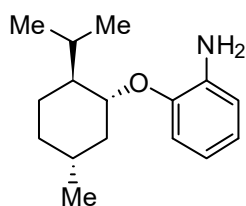

1-(((1R,2S,5R)-2-Isopropyl-5-methylcyclohexyl)oxy)-2-nitrobenzene (4.33 g, 15.6 mmol, 1.00 equiv.) was dissolved in ethanol/acetic acid (250 mL, 1:1), treated with iron powder (2.62 g, 46.0 mmol, 3.00 equiv.) and stirred for 3 h at 100 °C. After cooling to rt the mixture was diluted with EtOAc (275 mL) and the *pH* value was adjusted to *pH*=10 using aq. NaOH (1 M) and sat. aq. Na<sub>2</sub>CO<sub>3</sub>-sol. The phases were separated and the organic phase was washed with sat. aq. NaHCO<sub>3</sub>-sol. (3 x 10 mL). The combined organic phases were dried over Na<sub>2</sub>SO<sub>4</sub> and the solvent was removed under reduced pressure. Column chromatography (SiO<sub>2</sub>, 50:1 pentane/EtOAc) provided the title product as a yellow oil (2.50 g, 10.1 mmol, 65%).

**TLC:** *R*<sub>f</sub> = 0.19 (Pent/EtOAc: 30:1); **IR** (neat):  $\tilde{\nu}$  = 2955, 2925, 2867, 1612, 1503, 1456, 1275, 1217, 1038, 1012, 991, 739 cm<sup>-1</sup>; **<sup>1</sup>H-NMR** (300 MHz, CDCl<sub>3</sub>):  $\delta$  (ppm) = 6.84-6.64 (m, 4 H), 4.06 (d, <sup>3</sup>*J* = 4.1 Hz, 1 H), 3.76 (s, 2 H), 2.27 (qd, <sup>3</sup>*J* = 7.0, <sup>4</sup>*J* = 2.8 Hz, 1 H), 2.18 (dtd, <sup>3</sup>*J* = 12.4, 3.8, <sup>4</sup>*J* = 2.1 Hz, 1 H), 1.81-1.66 (m, 2 H), 1.66-1.36 (m, 2 H), 1.13 (m, 1 H), 1.01 (m, 1 H), 0.92 (dd, <sup>3</sup>*J* = 10.3, 6.8 Hz, 7 H), 0.80 (d, <sup>3</sup>*J* = 6.9 Hz, 3 H). **<sup>13</sup>C-NMR** (75 MHz, CDCl<sub>3</sub>):  $\delta$  (ppm) = 145.6, 137.3, 120.8, 118.4, 115.4, 113.1, 77.8, 48.1, 40.5, 34.6, 31.4, 26.1, 23.7, 22.2, 20.9, 16.7; **HR-MS** (ESI): calc. for: C<sub>16</sub>H<sub>26</sub>Na [M+Na]<sup>+</sup>: 248.2009, found: 248.2013; **optical rotation**  $\alpha^{D_{20}}$  = -115° (c = 1.00, CHCl<sub>3</sub>).

### 3.3.3 1-(((1R,2S,5R)-2-Isopropyl-5-methylcyclohexyl)oxy)-2-selenocyanatobenzol (10b)

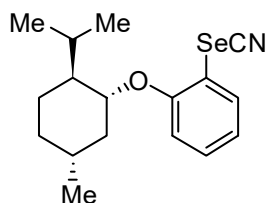

BF<sub>3</sub>·OEt<sub>2</sub> (4.24 mL, 4.79 g, 34.0 mmol, 3.50 equiv.) was dissolved in dry THF (65 mL) under an argon atmosphere at -30 °C (((1R,2S,5R)-2-isopropyl-5-methylcyclohexyl)oxy)aniline (2.50 g, 10.1 mmol, 1.00 equiv.) in dry THF (20 mL) and *tert*-butylnitrite (4.59 mL, 3.98 g, 39 mmol, 4.00 equiv.) were slowly added and the mixture was warmed to rt within 30 min and stirred for further 30 min at rt. The resulting solid was filtered off and washed with diethyl ether until it was completely white (ATTENTION: USE EXPLOSION SHIELD!). The filtrate was also treated with diethyl ether (40 mL) and the resulting solid was also filtered off and washed with diethyl ether. The combined solids were dried *in vacuo* and then dissolved in dry acetonitrile (50 mL). The solution was cooled to -20 °C and a solution of potassium selenocyanate (1.39 g, 9.64 mmol, 1.00 equiv.) in dry acetonitrile (25 mL) was slowly added. The mixture was slowly warmed to 0 °C (ice bath) and warmed to rt over 16 h. The mixture was diluted with DCM/water (100 mL, 1:1) and the phases were separated. The aqueous phase was extracted with diethyl ether (3 x 50 mL) and the combined organic phases were dried over Na<sub>2</sub>SO<sub>4</sub>. Removal of the solvent under reduced pressure provided the title product as an orange-red oil (2.98 g, 8.86 mmol, 88%). The crude product was used without further purification.

**TLC:**  $R_f$  = 0.44 (Pent/EtOAc: 30:1); **IR** (neat):  $\tilde{\nu}$  = 2955, 2925, 2865, 1471, 1243, 991, 749, 679, 669, 656  $\text{cm}^{-1}$ ;  **$^1\text{H}$  NMR** (300 MHz,  $\text{CHCl}_3$ )  $\delta$  (ppm) = 7.61 (dd,  $^3J$  = 7.9 Hz,  $^4J$  = 1.5 Hz, 1 H), 7.30 (m, 1 H), 6.99 (m, 1 H), 6.88 (m, 1 H), 4.14 (td,  $^3J$  = 10.5, 4.2 Hz, 1 H), 2.17 – 2.04 (m, 2 H), 1.79 – 1.66 (m, 2 H), 1.62 – 0.84 (m, 12 H), 0.75 (d,  $^3J$  = 6.9 Hz, 2 H).  **$^{13}\text{C}$ -NMR** (126 MHz,  $\text{CDCl}_3$ ):  $\delta$  (ppm) = 154.0, 129.6, 129.3, 122.4, 112.6, 101.8, 79.2, 47.8, 40.2, 34.3, 31.5, 26.3, 23.7, 22.1, 20.8, 16.7; **HR-MS (ESI):** calc. for:  $\text{C}_{17}\text{H}_{23}\text{NOSeNa}$  ( $[\text{M}+\text{Na}]^+$ ): 360.0838; found: 360.0841.

### 3.3.4 1,2-Bis(2-(((1S,2R,5S)-2-isopropyl-5-methylcyclohexyl)oxy)-phenyl)diselane (11b)<sup>[8]</sup>

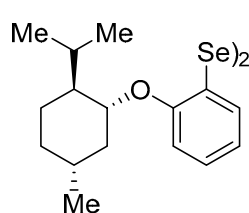

1-(((1S,2R,5S)-5-Methyl-2-(2-phenylpropan-2-yl)cyclohexyl)oxy)-2-selenocyanatobenzene (2.98 g, 8.86 mmol, 1.00 equiv.) was dissolved in ethanol (50 mL), treated with aq. NaOH sol. (2.4 M, 4 mL, 10.0 mmol, 1.10 equiv.) and stirred for 1 h at rt. A mixture of DCM/water (120 mL, 1:1) was added, the phases were separated, and the aqueous phase was extracted with DCM (3 x 60 mL). The combined organic phases were dried over  $\text{Na}_2\text{SO}_4$  and the solvent was removed under reduced pressure. Column chromatography ( $\text{SiO}_2$ , 20:1 pentane/DCM) provided the title product as a yellow oil (900 mg, 1.45 mmol, 33%).

**TLC:**  $R_f$  = 0.50 (pentane/EtOAc: 30:1); **IR** (neat):  $\tilde{\nu}$  = 2948, 2921, 2866, 1572, 1463, 1441, 1275, 1264, 1234, 1046, 1028, 1009, 992, 747, 668, 655  $\text{cm}^{-1}$ ;  **$^1\text{H}$ -NMR** (300 MHz,  $\text{CDCl}_3$ ):  $\delta$  (ppm) = 7.51 (dd,  $^3J$  = 8.0 Hz,  $^4J$  = 1.6 Hz, 1 H), 7.15 (ddd,  $^3J$  = 8.2, 7.4 Hz,  $^4J$  = 1.6 Hz, 1 H), 6.84-6.79 (m, 2 H), 4.15 (dt,  $^3J$  = 10.5, 4.1 Hz, 1 H), 2.36 (quintd,  $^3J$  = 7.0,  $^4J$  = 2.8 Hz, 1 H), 2.18 (m, 1 H), 1.81-1.68 (m, 2 H), 1.67-1.58 (m, 2H), 1.48 (dddd,  $^3J$  = 15.2, 12.0, 5.8 Hz,  $^4J$  = 3.3 Hz, 1 H), 1.21-1.05 (m, 2 H), 0.95 (dd,  $^3J$  = 15.8, 6.8 Hz, 6 H), 0.81 (d,  $^3J$  = 7.0 Hz, 3 H);  **$^{13}\text{C}$ -NMR** (101 MHz,  $\text{CDCl}_3$ ):  $\delta$  (ppm) = 155.3, 130.2, 127.6, 121.5, 120.2, 112.1, 78.6, 47.9, 40.3, 34.4, 31.5, 26.1, 23.6, 22.1, 20.9, 16.7;  **$^{77}\text{Se}$ -NMR** (95 MHz,  $\text{CDCl}_3$ ):  $\delta$  (ppm) = 324.79; **HR-MS (ESI):** calc. for:  $\text{C}_{32}\text{H}_{46}\text{O}_2\text{Se}_2\text{K}$  ( $[\text{M}+\text{K}]^+$ ): 661.1466, found: 661.1422; **optical rotation**  $\alpha_{\text{D}^{20}} = -93^\circ$  ( $c$  = 1.10,  $\text{CHCl}_3$ ).

### 3.3.5 1-(((1R,2S,5R)-5-Methyl-2-(2-phenylpropan-2-yl)cyclohexyl)oxy)-2-nitrobenzene<sup>[6]</sup>

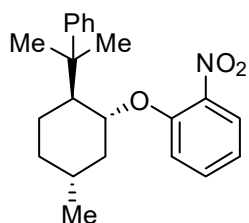

Sodium hydride (60 w% in mineral oil, 103 mg, 2.58  $\mu\text{mol}$ , 1.50 equiv.) was suspended in dry THF (6 mL) under an argon atmosphere at 0  $^\circ\text{C}$ , treated with 2-fluoronitrobenzene (243 mg, 1.72 mmol, 1.00 equiv.). (–)-8-phenylmenthol (600 mg, 2.58 mmol, 1.50 equiv.) in dry THF (2 mL) was slowly added and the mixture was allowed to warm to rt and stirred for 16 h at 60  $^\circ\text{C}$ . After cooling to rt, sat. aq.  $\text{NH}_4\text{Cl}$ -sol. (10 mL) was added, the aqueous phase was extracted with DCM (3 x 25 mL), the combined organic phases were dried over  $\text{Na}_2\text{SO}_4$  and the solvent was removed under reduced pressure. Column chromatography ( $\text{SiO}_2$ , 20:1 pentane:DCM) provided the title product as a yellow solid (553 mg, 1.71 mmol, 99%).

**TLC:**  $R_f$  = 0.26 (15:1 Hex:EtOAc); **T<sub>m</sub>:** 82 °C; **IR** (ATR):  $\tilde{\nu}$  = 2925, 1604, 1525, 1483, 1353, 1279, 989, 767, 701  $\text{cm}^{-1}$ ; **<sup>1</sup>H-NMR** (500 MHz, CDCl<sub>3</sub>):  $\delta$  (ppm) = 7.73 (dd,  $^3J$  = 8.0 Hz,  $^4J$  = 1.8 Hz, 1 H), 7.42 (ddd,  $^3J$  = 8.4, 7.3 Hz,  $^4J$  = 1.8 Hz, 1 H), 7.26 – 7.18 (m, 4 H), 7.12 (m, 1 H), 6.93 (ddd,  $^3J$  = 8.1, 7.4 Hz,  $^4J$  = 1.1 Hz, 1 H), 6.88 (d,  $^3J$  = 8.4 Hz, 1 H), 4.22 (td,  $^3J$  = 10.4, 4.2 Hz, 1 H), 2.08 – 1.90 (m, 2 H), 1.60 – 1.48 (m, 2 H), 1.36 (s, 7 H), 1.12 (td,  $^3J$  = 12.6, 10.8 Hz, 1 H), 1.02 (tdd,  $^3J$  = 13.5, 12.1, 3.8 Hz, 1 H), 0.91 – 0.78 (m, 4 H); **<sup>13</sup>C-NMR** (126 MHz, CDCl<sub>3</sub>):  $\delta$  (ppm) = 150.2, 149.5, 141.0, 133.5, 127.8, 126.0, 125.6, 125.3, 119.5, 114.5, 79.0, 51.3, 40.4, 40.0, 34.5, 31.3, 29.6, 27.2, 25.6, 21.7; **HR-ESI-MS** (m/z) calc. for C<sub>22</sub>H<sub>27</sub>O<sub>3</sub>NNa [M+Na]<sup>+</sup>: 376.1883, found: 376.1883; **optical rotation:**  $\alpha^{D_{20}}$  = –158° (0.99, CHCl<sub>3</sub>).

### 3.3.6 2-(((1*R*,2*S*,5*R*)-5-Methyl-2-(2-phenylpropan-2-yl)cyclohexyl)oxy)aniline (**9c**) <sup>[7]</sup>

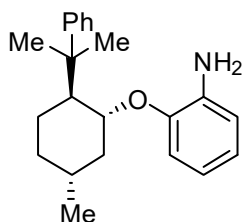

1-(((1*S*,2*R*,5*S*)-5-Methyl-2-(2-phenylpropan-2-yl)cyclohexyl)oxy)-2-nitrobenzene (200 mg, 566  $\mu$ mol, 1.00 equiv.) was dissolved in ethanol/acetic acid (9 mL, 1:1), treated with iron powder (95 mg, 1.70 mmol, 3.00 equiv.) and stirred for 3 h at 100 °C. After cooling to rt, the mixture was diluted with EtOAc (10 mL) and sat. aq. Na<sub>2</sub>CO<sub>3</sub>-sol. (10 mL) was added. The phases were separated and the organic phase was washed with sat. aq. NaHCO<sub>3</sub>-sol. (3 x 10 mL). The combined organic phases were dried over Na<sub>2</sub>SO<sub>4</sub> and the solvent was removed under reduced pressure. Column chromatography (SiO<sub>2</sub>, 20:1 15:1 pentane/EtOAc) provided the title product as a yellow oil (110 mg, 340  $\mu$ mol, 61%).

**TLC:**  $R_f$  = 0.18 (15:1 Hex:EtOAc); **IR** (ATR):  $\tilde{\nu}$  = 2951, 2922, 2867, 1611, 1501, 1457, 1278, 1213, 1008, 764, 735, 700 cm<sup>-1</sup>; **<sup>1</sup>H-NMR** (300 MHz, CDCl<sub>3</sub>):  $\delta$  (ppm) = 7.37 – 7.20 (m, 4 H), 7.19 – 7.08 (m, 1 H), 6.74 – 6.55 (m, 4 H), 4.19 (td, <sup>3</sup> $J$  = 10.4, 3.9 Hz, 1 H), 3.00 (sbr, 2 H), 2.27 – 2.00 (m, 2 H), 1.84 – 1.55 (m, 2 H), 1.37 (s, 4 H), 1.27 (s, 3 H), 1.12 (m, 1 H), 1.03 – 0.78 (m, 5 H); **<sup>13</sup>C-NMR** (126 MHz, CDCl<sub>3</sub>):  $\delta$  (ppm) = 152.1, 144.1, 137.1, 127.9, 125.5, 124.8, 120.2, 118.0, 115.2, 111.0, 76.8, 51.4, 40.1, 39.9, 35.0, 31.3, 28.1, 26.8, 25.7, 21.8; **HR-ESI-MS** ( $m/z$ ) calc. for C<sub>22</sub>H<sub>30</sub>ON [M+H]<sup>+</sup>: 324.2322, found: 324.2322; **optical rotation:**  $\alpha^{D_{20}}$  = –78° (0.92, DCM).

### 3.3.7 1-(((1*R*,2*S*,5*R*)-5-Methyl-2-(2-phenylpropan-2-yl)cyclohexyl)oxy)-2-selenocyanatobenzene (**10c**)

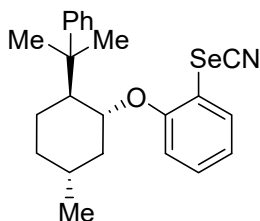

BF<sub>3</sub>·Et<sub>2</sub>O (564  $\mu$ L, 638 mg, 5.06 mmol, 3.50 equiv.) was dissolved in dry THF (2.5 mL) under an argon atmosphere at –30 °C. A solution of 2-(((1*S*,2*R*,5*S*)-5-methyl-2-(2-phenylpropan-2-yl)cyclohexyl)oxy)aniline (**9c**) (468 mg, 1.45 mmol, 1.00 equiv.) in dry THF (10 mL) and *tert*-butylnitrite (688  $\mu$ L, 597 mg, 5.79 mmol, 4.00 equiv.) were slowly added and the mixture was warmed to rt within 30 min and stirred for further 30 min at rt. The resulting solid was filtered off and washed with diethylether until it was completely white (ATTENTION: USE EXPLOSION SHIELD!). The filtrate was also treated with diethyl ether (40 mL) and the resulting solid was also filtered off and washed with diethyl ether. The combined solids were dried *in vacuo* and dissolved in dry acetonitrile (10 mL). The solution was cooled to –20 °C and a solution of potassium selenocyanate (418 mg, 2.90 mmol, 2.00 equiv.) in dry acetonitrile (5 mL) was slowly added. The mixture was slowly warmed to 0 °C (ice bath) and warmed to rt over 16 h. Then the mixture was diluted with DCM/water (20 mL, 1:1) and the phases were separated. The aqueous phase was extracted with diethyl ether (3 x 10 mL) and the combined organic phases were dried over Na<sub>2</sub>SO<sub>4</sub>. Removal of the solvent under reduced pressure provided the title product as orange-red oil (433 mg, 1.04 mmol, 72%). The crude product was used without further purification.

**IR** (ATR):  $\tilde{\nu}$  = 2956, 2924, 2869, 2151, 1585, 1494, 1470, 1445, 1239, 1030, 993, 749, 700  $\text{cm}^{-1}$ ; **H-NMR** (300 MHz,  $\text{CDCl}_3$ ):  $\delta$  (ppm) = 7.62 (dd,  $^3J$  = 7.9 Hz,  $^4J$  = 1.5 Hz, 1 H), 7.43 – 7.09 (m, 6 H), 7.01 (td,  $^3J$  = 7.6 Hz,  $^4J$  = 1.2 Hz, 1 H), 6.82 (dd,  $^3J$  = 8.4,  $^4J$  = 1.2 Hz, 1 H), 4.28 (m, 1 H), 2.17 – 1.91 (m, 2 H), 1.77 – 0.78 (m, 17 H); **HR-ESI-MS** (m/z) calc. for:  $\text{C}_{23}\text{H}_{27}\text{ONSeNa}$   $[\text{M}+\text{Na}]^+$ : 436.1151, found: 436.1151.

### 3.3.8 1,2-Bis(2-(((1*R*,2*S*,5*R*)-5-methyl-2-(2-phenylpropan-2-yl)cyclohexyl)oxy)phenyl)diselane (11c)<sup>[8]</sup>

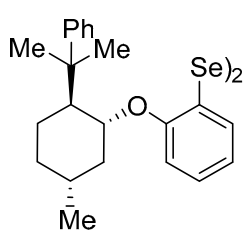

1-(((1*S*,2*R*,5*S*)-5-Methyl-2-(2-phenylpropan-2-yl)cyclohexyl)oxy)-2-selenocyanatobenzene (420 mg, 1.01 mmol, 1.00 equiv.) was dissolved in ethanol (12 mL), treated with aq. NaOH-sol. (4.5 M, 161  $\mu\text{L}$ , 725  $\mu\text{mol}$ , 0.50 equiv.) and stirred for 1 h at rt. A mixture of DCM/water (20 mL, 1:1) was added, the phases were separated, and the aqueous phase was extracted with DCM (3 x 10 mL). The combined organic phases were dried over  $\text{Na}_2\text{SO}_4$

and the solvent was removed under reduced pressure. Column chromatography ( $\text{SiO}_2$ , 20:1  $\rightarrow$  5:1 pentane/DCM) provided the title product as yellow oil (214 mg, 277  $\mu\text{mol}$ , 54%).

**TLC**:  $R_f$  = 0.18 (15:1 Hex:EtOAc); **IR** (ATR):  $\tilde{\nu}$  = 2952, 2921, 2868, 1571, 1464, 1441, 1227, 1030, 996, 908, 746, 700, 409  $\text{cm}^{-1}$ ; **<sup>1</sup>H-NMR** (500 MHz,  $\text{CDCl}_3$ ):  $\delta$  (ppm) = 7.50 (dd,  $^3J$  = 7.8 Hz,  $^4J$  = 1.6 Hz, 1 H), 7.37 – 7.32 (m, 2 H), 7.26 (m, 2 H), 7.20 – 7.10 (m, 2 H), 6.83 (ddd,  $^3J$  = 7.8, 7.3 Hz,  $^4J$  = 1.1 Hz, 1 H), 6.72 (m, 1 H), 4.25 (td,  $^3J$  = 10.4, 4.1 Hz, 1 H), 2.12 – 2.00 (m, 2 H), 1.61 – 1.29 (m, 9 H), 1.09 (td,  $^3J$  = 12.5, 10.7 Hz, 1 H), 1.00 (m, 1 H), 0.92 – 0.81 (m, 4 H); **<sup>13</sup>C-NMR** (126 MHz,  $\text{CDCl}_3$ ):  $\delta$  (ppm) = 153.9, 150.1, 130.4, 127.9, 127.5, 126.1, 125.3, 121.5, 120.6, 111.8, 78.4, 51.5, 40.7, 40.4, 34.7, 31.4, 30.6, 27.3, 25.1, 21.8; **<sup>77</sup>Se-NMR** (95 MHz,  $\text{CDCl}_3$ )  $\delta$  (ppm) = 331.86. **HR-ESI-MS** (m/z) calc. for:  $\text{C}_{44}\text{H}_{54}\text{O}_2\text{Se}_2\text{Na}$   $[\text{M}+\text{Na}]^+$ : 797.2356 found: 797.2338. **optical rotation**:  $\alpha_{\text{D}_{20}} = -84$  (0.60,  $\text{CHCl}_3$ ).

### 3.3.9 (1*S*,4*aR*,8*R*,8*aR*)-8-Phenyldecahydronaphthalen-1-ol<sup>[9]</sup>

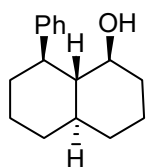

The compound was synthesized according to a literature-known procedure. The spectra are in accordance with the literature.

**TLC**:  $R_f$  (30:1 Pent/EtOAc) = 0.13; **IR** (ATR)  $\tilde{\nu}$  = 3591, 2921, 2853, 1714, 1493, 1449, 1048, 759, 701  $\text{cm}^{-1}$ ; **<sup>1</sup>H-NMR** (300 MHz,  $\text{CDCl}_3$ )  $\delta$  (ppm) = 7.50 – 7.13 (m, 5 H), 3.49 (dddd,  $^3J$  = 10.6, 9.1, 4.5 Hz,  $^4J$  = 1.9 Hz, 1 H), 2.41 (ddd,  $^3J$  = 11.9, 10.3,  $^4J$  = 3.3 Hz, 1 H), 2.04 – 0.92 (m, 13 H); **<sup>13</sup>C-NMR** (126 MHz,  $\text{CDCl}_3$ )  $\delta$  (ppm) = 146.8, 129.1, 127.4, 126.8, 75.6, 54.8, 50.5, 41.8, 37.1, 35.1, 33.9, 33.8, 26.5, 23.9; **HR-ESI-MS** m/z calc. for  $\text{C}_{16}\text{H}_{22}\text{ONa}$  ( $[\text{M}+\text{Na}]^+$ ): 253.1563, found: 253.1563; **optical rotation**:  $\alpha_{\text{D}_{20}} = 9.9^\circ$  (c = 1.00,  $\text{CHCl}_3$ ).

### 3.3.10 (1S,4aR,8R,8aR)-1-(2-Bromophenoxy)-8-phenyldecahydronaphthalene (16)<sup>[10]</sup>

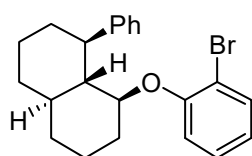

(1S,4aR,8R,8aR)-8-Phenyldecahydronaphthalen-1-ol (275 mg, 1.19 mmol, 1.00 equiv.) and 1-bromo-2-fluorobenzene (189 mg, 1.08 mmol, 0.90 equiv.) were dissolved in dry DMF (3 mL) and potassium *tert*-butoxide (1 M in THF, 1.37 mL, 1.37 mmol, 1.15 equiv.)

was added dropwise. The mixture was stirred for 16 h at 100 °C and another portion of 1-bromo-2-fluorobenzene (100 mg, 570 µmol, 0.48 equiv.) and potassium *tert*-butoxide (1 M in THF, 1.00 mL, 1.00 mmol, 0.90 equiv.) were added. The reaction was stirred 3 h at 100 °C and, after cooling to rt quenched with H<sub>2</sub>O (5 mL). The mixture was extracted with Et<sub>2</sub>O (3 x 10 mL), the combined org. phases were washed with water (2 x 10 mL) and brine (10 mL), dried over Na<sub>2</sub>SO<sub>4</sub> and the solvent was removed under reduced pressure. Column chromatography (SiO<sub>2</sub>, pentane → 4:1 pentane:DCM) provided the title product as yellow oil (261 mg, 677 µmol, 57%).

**TLC:** *R<sub>f</sub>* (4:1 Pent/DCM) = 0.74; **IR** (ATR)  $\tilde{\nu}$  = 2925, 2852, 1585, 1474, 1441, 1272, 1245, 1031, 744, 697 cm<sup>-1</sup>; **<sup>1</sup>H-NMR** (300 MHz, CDCl<sub>3</sub>)  $\delta$  (ppm) = 7.23 (dd, <sup>3</sup>*J* = 7.8 Hz, <sup>4</sup>*J* = 1.7 Hz, 1 H), 7.12 – 6.99 (m, 3 H), 6.99 (t, <sup>3</sup>*J* = 7.4 Hz, 2H), 6.89 (m, 1 H), 6.65 (dd, <sup>3</sup>*J* = 8.4 Hz, <sup>4</sup>*J* = 1.3 Hz, 1 H), 6.60 (td, <sup>3</sup>*J* = 7.6 Hz, <sup>4</sup>*J* = 1.4 Hz, 1 H), 4.13 (td, <sup>3</sup>*J* = 9.6, 4.7 Hz, 1 H), 2.45 – 2.30 (m, 2 H), 1.99 – 1.13 (m, 15 H); **<sup>13</sup>C-NMR** (125 MHz, CDCl<sub>3</sub>)  $\delta$  (ppm) = 153.4, 146.9, 133.0, 127.6, 127.0, 125.0, 120.5, 113.6, 113.0, 80.5, 51.7, 50.8, 42.9, 37.3, 34.0, 32.0, 26.6, 23.6; **HR-ESI-MS** *m/z* calc. for C<sub>22</sub>H<sub>25</sub>OBrNa ([M+Na]<sup>+</sup>): 407.0981, found: 407.0980; **optical rotation:**  $\alpha_{D_{20}}$  = –41.9° (*c* = 1.04, CHCl<sub>3</sub>).

### 3.3.11 Butyl(2-(((1S,4aR,8R,8aR)-8-phenyldecahydronaphthalen-1-yl)oxy)phenyl)selenane (11d)

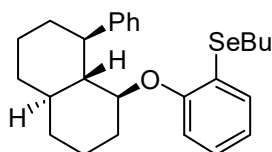

(1S,4aR,8R,8aR)-1-(2-bromophenoxy)-8-phenyldecahydronaphthalene (**16**) (260 mg, 677 µmol, 1.00 equiv.) was dissolved in dry Et<sub>2</sub>O (12 mL) and *n*-butyllithium (2.5 M in hexane, 298 µL, 745 mmol, 1.10 equiv.) was added dropwise. The

mixture was stirred for 1 h at 45 °C and selenium (160 mg, 2.03 mmol, 3.00 equiv.) was added. The mixture was stirred for another 16 h at 45 °C and quenched with NH<sub>4</sub>Cl (10 mL). The mixture was extracted with DCM (3 x 20 mL), the combined org. phases were dried over Na<sub>2</sub>SO<sub>4</sub> and the solvent was removed under reduced pressure. Column chromatography (SiO<sub>2</sub>, 20:1 Pent/DCM) followed by gel-permeation chromatography (CHCl<sub>3</sub>) provided the title product as yellow oil (48.5 mg, 110 µmol, 16%).

**TLC:** *R<sub>f</sub>* = 0.21 (pentane:DCM); **IR** (ATR)  $\tilde{\nu}$  = 2922, 2852, 1574, 1467, 1440, 1268, 1233, 1123, 1036, 1012, 965, 753, 697 cm<sup>-1</sup>; **<sup>1</sup>H-NMR** (500 MHz, CDCl<sub>3</sub>)  $\delta$  (ppm) = 7.11 – 7.01 (m, 3 H), 7.05 – 6.93 (m, 3 H), 6.86 (tt, <sup>3</sup>*J* = 7.4 Hz, <sup>4</sup>*J* = 1.2 Hz, 1 H), 6.69 (td, <sup>3</sup>*J* = 7.4 Hz, <sup>4</sup>*J* = 1.2 Hz, 1 H), 6.60

(dt,  $^3J = 8.0$  Hz,  $^4J = 1.0$  Hz, 1 H), 4.09 (td,  $^3J = 9.7$ , 4.5 Hz, 1 H), 2.67 – 2.56 (m, 2 H), 2.41 (ddd,  $^3J = 12.0$ , 10.3,  $^4J = 3.5$  Hz, 1 H), 1.92 – 1.11 (m, 18 H), 0.90 (t,  $^3J = 7.4$  Hz, 3 H);  $^{13}\text{C-NMR}$  (126 MHz,  $\text{CDCl}_3$ )  $\delta$  (ppm) = 155.3, 147.2, 130.0, 127.6, 127.0, 126.0, 124.8, 122.6, 120.5, 113.1, 81.2, 53.4, 51.6, 50.6, 42.3, 37.4, 33.9, 33.5, 32.1, 31.6, 26.5, 24.7, 23.5, 23.1, 13.6;  $^{77}\text{Se-NMR}$  (95 MHz,  $\text{CDCl}_3$ )  $\delta$  (ppm) = 232.35; **HR-ESI-MS**  $m/z$  calc. for  $\text{C}_{26}\text{H}_{35}\text{OSe}$  ( $[\text{M}+\text{H}]^+$ ): 443.1849, found: 443.1854; **optical rotation**:  $\alpha_{\text{D}_{20}} = -65.8^\circ$  ( $c = 0.96$ ,  $\text{CHCl}_3$ ).

### 3.3.12 (1S)-1,7,7-Trimethyl-2-(2-nitrophenoxy)bicyclo[2.2.1]heptane<sup>[6]</sup>

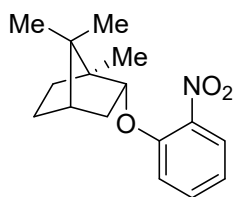

Sodium hydride (60 w% in mineral oil, 2.00 g, 13.0 mmol, 1.25 equiv.) was suspended in dry THF (32 mL) under an argon atmosphere at 0 °C, treated with 2-fluoronitrobenzene (1.46 mg, 10.37 mmol, 1.00 equiv.). A solution of (–)-borneol (2.00 g, 13.0 mmol, 1.25 Äq equiv.) in dry THF (12 mL) was slowly added and the mixture was allowed to warm to rt and stirred for 16 h at 60 °C. After cooling to rt sat. aq.  $\text{NH}_4\text{Cl}$ -sol. (30 mL) was added, the aqueous phase was extracted with DCM (3 x 50 mL), the combined organic phases were dried over  $\text{Na}_2\text{SO}_4$  and the solvent was removed under reduced pressure. Column chromatography ( $\text{SiO}_2$ , 15:1 pentane/EtOAc) provided the title product as an orange solid (2.36 g, 8.57 mmol, 83%).

**TLC**:  $R_f = 0.41$  (30:1 pentane:EtOAc); **T<sub>m</sub>**: 68 °C; **IR** (ATR)  $\tilde{\nu} = 2953, 1606, 1523, 1482, 1351, 1274, 1164, 1021, 867, 840, 743$   $\text{cm}^{-1}$ ;  $^1\text{H-NMR}$  (300 MHz,  $\text{CDCl}_3$ )  $\delta$  (ppm) = 7.82 (dd,  $^3J = 8.1$  Hz,  $^4J = 1.7$  Hz, 1 H), 7.47 (ddd,  $^3J = 8.3$ , 7.4 Hz,  $^4J = 1.7$  Hz, 1 H), 6.99 – 6.89 (m, 2 H), 4.43 (ddd,  $^3J = 9.3$ , 3.3 Hz,  $^4J = 1.7$  Hz, 1 H), 2.40 (ddt,  $^3J = 13.3$ , 9.2, 3.8 Hz, 1 H), 2.27 (m, 1 H), 1.87 – 1.70 (m, 2 H), 1.46 – 1.21 (m, 2 H), 1.16 (dd,  $^3J = 13.3$ , 3.4 Hz, 1 H), 0.94 (s, 6 H), 0.93 (s, 3 H);  $^{13}\text{C-NMR}$  (76 MHz,  $\text{CDCl}_3$ )  $\delta$  (ppm) = 152.5, 140.1, 133.9, 125.6, 119.5, 115.4, 85.1, 49.8, 47.6, 45.1, 36.6, 27.8, 26.8, 19.6, 18.9, 13.6; **HR-ESI-MS**  $m/z$  calc. for  $\text{C}_{16}\text{H}_{21}\text{NO}_3\text{Na}$  ( $[\text{M}+\text{Na}]^+$ ): 298.1414, found: 298.1418; **optical rotation**  $\alpha_{\text{D}_{20}} = -136^\circ$  ( $c = 0.997$ ,  $\text{CHCl}_3$ ).

### 3.3.13 2-(((1S,2R,4S)-1,7,7-Trimethylbicyclo[2.2.1]heptan-2-yl)oxy)-aniline (9a) <sup>[7]</sup>

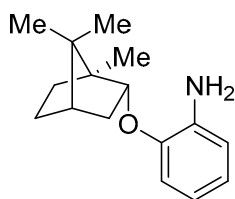

(1S)-1,7,7-Trimethyl-2-(2-nitrophenoxy)bicyclo[2.2.1]heptane (2.00 g, 7.26 mmol, 1.00 equiv.) was dissolved in ethanol/acetic acid (140 mL, 1:1), treated with iron powder (1.22 g, 21.8 mmol, 3.00 equiv.) and stirred for 3 h at 100 °C. After cooling to rt the mixture was diluted with EtOAc (10 mL) and brought to pH=10 by the addition of aq.  $\text{NaOH}$ -sol. (1 M). The phases were separated and the organic phase was washed with sat. aq.  $\text{NaHCO}_3$ -sol. (3 x 100 mL). The combined organic phases were dried over  $\text{Na}_2\text{SO}_4$  and the solvent was removed under reduced pressure. Column chromatography ( $\text{SiO}_2$ , 30:1 pentane:EtOAc) provided the

title product as a red solid (1.33 g, 5.42 mmol, 75%). (1S)-1,7,7-Trimethyl-2-(2-nitrophenoxy)bicyclo[2.2.1]heptane (222 mg, 806  $\mu$ mol, 11%) could be reisolated.

**TLC:**  $R_f$  = 0.34 (15:1 Hex:EtOAc); **T<sub>m</sub>:** 66 °C; **IR** (ATR)  $\tilde{\nu}$  = 2951, 1612, 1504, 1457, 1273, 1216, 1114, 1053, 735  $\text{cm}^{-1}$ ; **<sup>1</sup>H-NMR** (400 MHz, CDCl<sub>3</sub>)  $\delta$  (ppm) = 6.81 – 6.63 (m, 4H), 4.34 (ddd,  $^3J_{HH}$  = 9.2, 3.3 Hz,  $^4J_{HH}$  = 1.9 Hz, 1H), 3.80 (s<sub>br</sub>, 2H), 2.39 (dddd,  $^3J_{HH}$  = 13.6, 9.2, 4.7, 3.3 Hz, 1H), 2.27 – 2.17 (m, 1H), 1.85 – 1.72 (m, 2H), 1.45 – 1.34 (m, 1H), 1.29 (m, 1H), 1.17 (dd,  $^3J_{HH}$  = 13.4, 3.4 Hz, 1H), 0.95 (s, 3H), 0.95 (s, 3H), 0.92 (s, 3H); **<sup>13</sup>C-NMR** (101 MHz, CDCl<sub>3</sub>)  $\delta$  (ppm) = 146.5, 136.6, 120.6, 118.4, 115.0, 112.5, 83.1, 49.6, 47.6, 45.2, 37.0, 28.0, 27.1, 19.7, 18.9, 13.9; **HR-ESI-MS**  $m/z$  calc. for: C<sub>16</sub>H<sub>24</sub>NO ([M+H]<sup>+</sup>): 246.1852, found: 246.1860; **optical rotation**  $\alpha_{D_{20}}$  = –117 ° (c = 1.00, CHCl<sub>3</sub>, 3mm).

### 3.3.14 (1S)-1,7,7-Trimethyl-2-(2-selenocyanatophenoxy)bicyclo[2.2.1]-heptane (10a)

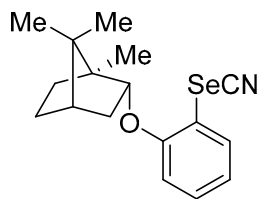

BF<sub>3</sub>·OEt<sub>2</sub> (796  $\mu$ L, 899 mg, 7.14 mmol, 3.50 equiv.) was dissolved in dry THF (15 mL) under argon atmosphere at -30 °C. A solution of 2-(((1S,2R,4S)-1,7,7-trimethylbicyclo[2.2.1]heptan-2-yl)oxy)-aniline (**9a**) (500 mg, 2.04 mmol, 1.00 equiv.) in dry THF (15 mL) and *tert*-butyl nitrite (841 mg, 8.16 mmol, 4.00 equiv.) were slowly added and the mixture was slowly warmed to rt within 30 min and stirred for further 30 min at rt. The resulting solid was filtered off and washed with diethyl ether until it was completely white (ATTENTION: USE EXPLOSION SHIELD!). The filtrate was treated with pentane (15 mL) and the resulting solid was filtered off. The combined solids were dried *in vacuo* and then dissolved in dry acetonitrile (10 mL). The solution was cooled to -20 °C and potassium selenocyanate (293 mg, 2.04 mmol, 1.00 equiv.) in dry acetonitrile (5 mL) was slowly added. The mixture was slowly warmed to 0 °C (ice-bath) and warmed to rt over 16 h. Then the mixture was diluted with DCM/water (20 mL, 1:1) and the phases were separated. The aqueous phase was extracted with DCM (2 x 20 mL) and the combined organic phases were dried over Na<sub>2</sub>SO<sub>4</sub> and the solvent was removed under reduced pressure. Column chromatography (SiO<sub>2</sub>, 4:1 Pent/DCM) provided the title product as a brown oil (409 mg, 1.22 mmol, 60%).

**TLC:** *R<sub>f</sub>* (4:1 Pent:DCM) = 0.15; **IR** (ATR)  $\tilde{\nu}$  = 2953, 1574, 1472, 1446, 1305, 1278, 1245, 1054, 1022, 993, 746 cm<sup>-1</sup>; **<sup>1</sup>H-NMR** (400 MHz, CDCl<sub>3</sub>)  $\delta$  (ppm) = 7.63 (dd, <sup>3</sup>*J* = 7.9 Hz, <sup>4</sup>*J* = 1.5 Hz, 1 H), 7.29 (ddd, <sup>3</sup>*J* = 8.2, 7.5 Hz, <sup>4</sup>*J* = 1.5 Hz, 1 H), 7.00 (ddd, <sup>3</sup>*J* = 7.9, 7.5 Hz, <sup>4</sup>*J* = 1.2 Hz, 1 H), 6.76 (dd, <sup>3</sup>*J* = 8.2 Hz, <sup>4</sup>*J* = 1.2 Hz, 1 H), 4.41 (ddd, <sup>3</sup>*J* = 9.3, 3.3 Hz, <sup>4</sup>*J* = 1.9 Hz, 1 H), 2.39 (dddd, <sup>3</sup>*J* = 13.7, 9.2, 4.6, 3.3 Hz, 1 H), 2.10 (ddd, <sup>3</sup>*J* = 13.4, 9.3, 3.9 Hz, 1 H), 1.91 – 1.71 (m, 2 H), 1.42 (m, 1 H), 1.27 (m, 1 H), 1.13 (dd, <sup>3</sup>*J* = 13.5, 3.3 Hz, 1 H), 0.96 (s, 3 H), 0.94 (s, 3 H), 0.93 (s, 3 H); **<sup>13</sup>C-NMR** (101 MHz, CDCl<sub>3</sub>)  $\delta$  (ppm) = 154.9, 129.7, 129.6, 122.4, 113.7, 112.8, 101.6, 84.9, 49.8, 47.7, 45.1, 36.7, 27.8, 27.0, 19.6, 18.9, 13.8; **<sup>77</sup>Se-NMR** (76 MHz, CDCl<sub>3</sub>)  $\delta$  (ppm) = 281.0; **HR-ESI-MS** *m/z* calc. for: C<sub>17</sub>H<sub>21</sub>NOS<sub>2</sub>Na ([M+Na]<sup>+</sup>): 358.0681, found: 358.0688.

### 3.3.15 1,2-Bis(2-(((1S,2R,4S)-1,7,7-trimethylbicyclo[2.2.1]heptan-2-yl)oxy)phenyl)diselenide (**11a**)<sup>[8]</sup>

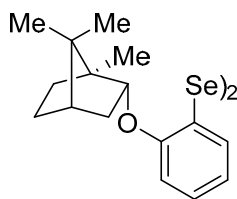

(1S)-1,7,7-Trimethyl-2-(2-selenocyanatophenoxy)bicyclo[2.2.1]-heptane (**10a**) (370 mg, 1.11 mmol, 1.00 equiv.) was dissolved in ethanol (12 mL), treated with aq. NaOH-sol. (2.5 M in water, 221  $\mu$ L, 553  $\mu$ mol, 0.50 equiv.) and stirred for 1 h at rt. Filtration yielded the title product as a yellow solid (270 mg, 438  $\mu$ mol, 79%).

**T<sub>m</sub>**: 162 °C; **IR** (ATR)  $\tilde{\nu}$  = 2951, 2876, 1572, 1466, 1442, 1390, 1364, 1304, 1271, 1238, 1054, 1022, 744 cm<sup>-1</sup>; **<sup>1</sup>H-NMR** (400 MHz, CDCl<sub>3</sub>)  $\delta$  (ppm) = 7.53 (dd, <sup>3</sup>J = 7.5 Hz, <sup>4</sup>J = 1.6 Hz, 1 H), 7.15 (ddd, <sup>3</sup>J = 8.1, 7.5 Hz, <sup>4</sup>J = 1.6 Hz, 1 H), 6.84 (td, <sup>3</sup>J = 7.5 Hz, <sup>4</sup>J = 1.2 Hz, 1 H), 6.68 (dd, <sup>3</sup>J = 8.1 Hz, <sup>4</sup>J = 1.2 Hz, 1 H), 4.44 (ddd, <sup>3</sup>J = 9.3, 3.2 Hz, <sup>4</sup>J = 1.6 Hz, 1 H), 2.40 (dddd, <sup>3</sup>J = 13.5, 9.9, 4.8, 2.5 Hz, 2 H), 1.92 – 1.71 (m, 2 H), 1.50 – 1.30 (m, 2 H), 1.22 (dd, <sup>3</sup>J = 13.3, 3.3 Hz, 1 H), 1.03 (s, 3 H), 0.97 (s, 3 H), 0.95 (s, 3 H); **<sup>13</sup>C-NMR** (101 MHz, CDCl<sub>3</sub>)  $\delta$  (ppm) = 156.0, 130.0, 130.0, 127.7, 127.6, 121.5, 121.5, 121.4, 119.8, 112.1, 111.9, 84.2, 84.1, 49.9, 47.6, 45.3, 45.2, 37.0, 36.9, 36.8, 27.9, 27.9, 27.8, 27.2, 27.1, 27.1, 19.7, 19.7, 19.0, 19.0, 19.0, 13.9, 13.9, 13.9, 13.8; **<sup>77</sup>Se-NMR** (76 MHz, CDCl<sub>3</sub>)  $\delta$  (ppm) = 281; **HR-ESI-MS** m/z calc. for C<sub>32</sub>H<sub>42</sub>O<sub>2</sub>Se<sub>2</sub>Na ([M+Na]<sup>+</sup>): 657.1153, found.: 657.1150; **optical rotation**  $\alpha^{D_{20}}$  = -91° (c = 1.005%, CHCl<sub>3</sub>, 3mm).

### 3.3.16 (R)-4-Chlorodinaphtho[2,1-d:1',2'-f][1,3,2]dioxaphosphepine 4-oxide (18)<sup>[11]</sup>

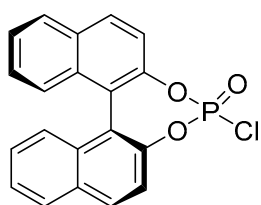

(R)-BINOL (500 mg, 1.75 mmol, 1.00 equiv.) and triethyl amine (975  $\mu$ L, 707 mg, 6.98 mmol, 4.00 equiv.) were dissolved in dry toluene (10 mL), cooled to 0 °C and POCl<sub>3</sub> (175  $\mu$ L, 294 mg, 1.92 mmol, 1.10 equiv.) was added slowly. The mixture was stirred for 16 h at 0 °C and the solvent was removed under reduced pressure. Column chromatography (SiO<sub>2</sub>, DCM) provided the title compound as colorless solid (484 mg, 1.32 mmol, 75%).

**TLC**:  $R_f$  = 0.60 (DCM); **T<sub>m</sub>**: 188 °C; **IR** (ATR)  $\tilde{\nu}$  = 2956, 2923, 2853, 1591, 1508, 1463, 1227, 1029, 963, 815, 748, 597, 483, 400 cm<sup>-1</sup>; **<sup>1</sup>H-NMR** (400 MHz, CDCl<sub>3</sub>)  $\delta$  (ppm) = 8.13 – 8.04 (m, 2 H), 8.04 – 7.95 (m, 2 H), 7.63 (dd, <sup>3</sup>J = 8.9, 1.1 Hz, 1 H), 7.59 – 7.48 (m, 3 H), 7.45 – 7.29 (m, 4 H); **<sup>13</sup>C-NMR** (101 MHz, CDCl<sub>3</sub>)  $\delta$  (ppm) = 146.6 (d, <sup>3</sup>J<sub>CP</sub> = 12.7 Hz), 146.3 (d, <sup>3</sup>J<sub>CP</sub> = 11.3 Hz), 132.2 (d, <sup>5</sup>J<sub>CP</sub> = 1.9 Hz), 132.1, 132.0 (d, <sup>5</sup>J<sub>CP</sub> = 1.8 Hz), 131.9 (d, <sup>5</sup>J<sub>CP</sub> = 1.5 Hz), 131.6 (d, <sup>5</sup>J<sub>CP</sub> = 1.6 Hz), 128.8 – 128.4 (m), 127.3 – 127.0 (m), 126.3 – 126.3 (m), 121.6 (d, <sup>4</sup>J<sub>CP</sub> = 3.0 Hz), 121.5 (d, <sup>4</sup>J<sub>CP</sub> = 2.5 Hz), 120.3 (d, <sup>4</sup>J<sub>CP</sub> = 2.8 Hz), 119.9 (d, <sup>4</sup>J<sub>CP</sub> = 3.8 Hz); **<sup>31</sup>P-NMR** (162 MHz, CDCl<sub>3</sub>)  $\delta$  (ppm) = 10.9; **HR-ESI-MS** m/z calc. for: C<sub>20</sub>H<sub>13</sub>O<sub>3</sub>PCl ([M+H]<sup>+</sup>): 367.0285, found: 367.0277; the results are in accordance with literature.

### 3.3.17 2,2'-Diphenol diselenide (19)<sup>[12]</sup>

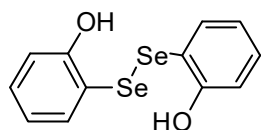

*n*-Butyllithium (2.5 M in hexan, 21 mL, 52.0 mmol, 1.50 equiv.) was added to dry hexane at -78 °C (20 mL) and TMEDA (5.2 mL, 4.03 g, 34.7 mmol, 2.00 equiv.) was added slowly. 2-Bromophenol (2.01 mL, 3.00 g, 17.3 mmol 0.50 equiv.) was then added to the cloudy solution at -78 °C and the mixture was stirred for further 2 h at rt. Selenium (1.38 g, 17.3 mmol, 0.50 equiv.) was added at 0 °C and the mixture was stirred for further 16 h at rt. Aq. HCl (1 M, 10 mL), water (30 mL) and EtOAc (20 mL) were added. The phases were separated, aq. HCl (5 M, 10 mL) was added to the aqueous phase, and it was extracted with EtOAc (3 x 20 mL). The combined org.

phases were dried over Na<sub>2</sub>SO<sub>4</sub> and the solvent was removed under reduced pressure. Column chromatography (SiO<sub>2</sub>, 15:1→2:1 Pent:EtOAc) provided the title compound as a red solid (893 mg, 2.58 mmol, 30%) as an inseparable mixture with 10 mol% 2-bromophenol.

**TLC:**  $R_f$ =0.15 (5:1 Hex:EtOAc); **IR** (ATR)  $\tilde{\nu}$  = 3424, 1574, 1463, 1443, 1334, 1287, 1236, 1180, 1022, 826, 750, 472, 446 cm<sup>-1</sup>; **<sup>1</sup>H-NMR** (400 MHz, CDCl<sub>3</sub>)  $\delta$  (ppm) = 7.37 (dd, <sup>3</sup> $J$  = 7.7 Hz, <sup>4</sup> $J$  = 1.7 Hz, 2 H), 7.32 (ddd, <sup>3</sup> $J$  = 8.2, 7.3 Hz, <sup>4</sup> $J$  = 1.7 Hz, 2 H), 7.01 (dd, <sup>3</sup> $J$  = 8.2 Hz, <sup>4</sup> $J$  = 1.4 Hz, 2 H), 6.79 (td, <sup>3</sup> $J$  = 7.5 Hz, <sup>4</sup> $J$  = 1.4 Hz, 2 H), 6.11 (s<sub>br</sub>, 2 H); **<sup>13</sup>C-NMR** (101 MHz, CDCl<sub>3</sub>)  $\delta$  (ppm) = 156.7, 137.5, 133.0, 121.1, 115.2; **<sup>77</sup>Se-NMR** (76 MHz, CDCl<sub>3</sub>)  $\delta$  (ppm) = 377; **HR-ESI-MS**  $m/z$  calc. for C<sub>12</sub>H<sub>10</sub>O<sub>4</sub>Se<sub>2</sub>Na ([M+Na]<sup>+</sup>): 368.8906, found: 368.8900.

### 3.3.18 (*R*)-4,4'-((Diselenidylbis(2,1-phenylene))bis(oxy))bis(dinaphtho-[2,1-d:1',2'-f][1,3,2]dioxaphosphepine 4-oxid) (20)

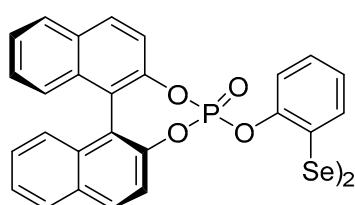

(*R*)-4-Chlorodinaphtho[2,1-d:1',2'-f][1,3,2]dioxaphosphepine 4-oxide (**18**) (100 mg, 273  $\mu$ mol, 2.00 equiv.), 2,2'-diphenoldiselenid (**19**) (50 mg, 138  $\mu$ mol, 1.00 equiv.) and triethyl amine (152  $\mu$ L, 110 mg, 1.09 mmol, 4.00 equiv.) were dissolved in dry DCM (5 mL). The mixture was stirred for 16 h at rt and sat. aq. NH<sub>4</sub>Cl-Lsg. (5 mL) was added. The aqueous phase was extracted with DCM (3 x 15 mL) the combined organic phases were dried over Na<sub>2</sub>SO<sub>4</sub> and column chromatography (SiO<sub>2</sub>, DCM) provided the title compound as yellow oil (37 mg, 28.4  $\mu$ mol, 21%).

**TLC:**  $R_f$  (DCM) = 0.70; **IR** (ATR)  $\tilde{\nu}$  = 1508, 1312, 1200, 1187, 1156, 967, 951, 899, 815, 750 cm<sup>-1</sup>; **<sup>1</sup>H-NMR** (400 MHz, CDCl<sub>3</sub>)  $\delta$  (ppm) = 8.07 (d, <sup>3</sup> $J_{HH}$  = 8.8 Hz, 2 H), 8.03 – 7.89 (m, 6 H), 7.64 (m, 2 H), 7.57 – 7.27 (m, 18 H), 7.23 – 7.13 (m, 2 H), 6.96 (t, <sup>3</sup> $J_{HH}$  = 7.6 Hz, 2 H); **<sup>13</sup>C-NMR** (101 MHz, CDCl<sub>3</sub>)  $\delta$  (ppm) = 148.3 (d, <sup>3</sup> $J_{CP}$  = 6.0 Hz), 147.3 (d, <sup>2</sup> $J_{CP}$  = 11.6 Hz), 146.0 (d, <sup>3</sup> $J_{CP}$  = 8.6 Hz), 132.4, 132.2 (d, <sup>5</sup> $J_{CP}$  = 1.0 Hz), 132.2 (d, <sup>5</sup> $J_{CP}$  = 1.1 Hz), 132.0 (d, <sup>5</sup> $J_{CP}$  = 1.4 Hz), 131.8 (d, <sup>5</sup> $J_{CP}$  = 1.1 Hz), 129.0 – 128.9 (m), 128.5 (d, <sup>4</sup> $J_{CP}$  = 4.3 Hz), 127.1 (d, <sup>2</sup> $J_{CP}$  = 9.1 Hz), 126.9 (d, <sup>4</sup> $J_{CP}$  = 2.2 Hz), 126.6, 126.0 (d, <sup>3</sup> $J_{CP}$  = 6.4 Hz), 121.5 (d, <sup>3</sup> $J_{CP}$  = 6.3 Hz), 121.1 (d, <sup>4</sup> $J_{CP}$  = 2.2 Hz), 120.5 (d, <sup>4</sup> $J_{CP}$  = 3.0 Hz), 120.2 (d, <sup>4</sup> $J_{CP}$  = 3.4 Hz), 119.3 (d, <sup>4</sup> $J_{CP}$  = 2.0 Hz); **<sup>31</sup>P-NMR** (203 MHz, CDCl<sub>3</sub>)  $\delta$  (ppm) = -3.75; **<sup>77</sup>Se-NMR** (95 MHz, CDCl<sub>3</sub>)  $\delta$  (ppm) = 364; **HR-ESI-MS**  $m/z$  calc. for C<sub>52</sub>H<sub>32</sub>O<sub>8</sub>P<sub>2</sub>Se<sub>2</sub>Na ([M+Na]<sup>+</sup>): 1028.9809, found: 1028.9782. **optical rotation:**  $\alpha^{D_{20}}$  = -45.5 (c = 1.44, CHCl<sub>3</sub>).

### 3.3.19 (1*S*,1'*S*,2*R*,2'*R*,4*R*,4'*R*)-2,2'-((2-Bromo-1,3-phenylene)bis(oxy))bis(1-isopropyl-4-methylcyclohexane)(13a)<sup>[10]</sup>

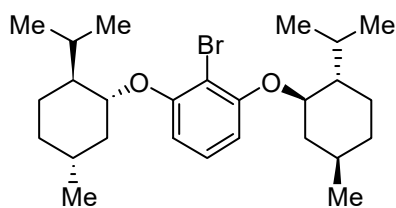

(-)-Menthol (810 mg, 5.18 mmol, 2.00 equiv.) and 1-bromo-2,6-difluorobenzene (189 mg, 1.08 mmol, 0.90 equiv.) were dissolved in dry DMF (10 mL) and sodium hydride (60 w% in mineral oil, 248 mg, 6.22 mmol, 2.40 equiv.) was added to the solution. The mixture was stirred for 19 h at 100 °C and quenched by the addition of aq. sat.  $\text{NH}_4\text{Cl}$ -sol. The mixture was extracted with EtOAc (3 x 20 mL), the combined org. phases were washed with water (2 x 10 mL) and brine (10 mL), dried over  $\text{Na}_2\text{SO}_4$  and the solvent was removed under reduced pressure. Column chromatography ( $\text{SiO}_2$ , pentane  $\rightarrow$  143:1 pentane/DCM) provided the title product as a colorless solid (467 mg, 1.12 mmol, 43%).

**TLC:**  $R_f$  (DCM) = 0.20 (pentane/DCM, 143:1); **T<sub>m</sub>:** 104 °C; **IR** (ATR)  $\tilde{\nu}$  = 2954, 2929, 2669, 1582, 1459, 1367, 1331, 1249, 1272, 1250, 1183, 1100, 1054, 1035, 981, 946, 923, 878, 844, 756, 703, 664  $\text{cm}^{-1}$ ;  **$^1\text{H-NMR}$**  (300 MHz,  $\text{CDCl}_3$ )  $\delta$  (ppm) = 7.12 (t,  $^3J$  = 8.3 Hz, 1 H), 6.51 (d,  $^3J$  = 8.4 Hz, 2 H), 4.07 (td,  $^3J$  = 10.5, 4.1 Hz, 2 H), 2.31 (heptd,  $^3J$  = 6.9, 2.7 Hz, 2 H), 2.18, 2.09 (m, 2 H), 1.80, 1.58 (m, 6 H), 1.45 (ddtd,  $^3J$  = 19.3, 9.7, 6.5 Hz,  $^4J$  = 3.3 Hz, 2 H), 1.18, 0.99 (m, 6 H), 0.93 (t,  $^3J$  = 6.9 Hz, 12 H), 0.76 (d,  $^3J$  = 7.0 Hz, 6 H);  **$^{13}\text{C-NMR}$**  (101 MHz,  $\text{CDCl}_3$ )  $\delta$  (ppm) = 156.3, 127.7, 106.3, 104.3, 79.1, 48.1, 40.5, 34.7, 31.7, 26.2, 23.9, 22.4, 21.1, 16.9; **HR-ESI-MS**  $m/z$  calc. for  $\text{C}_{26}\text{H}_{42}\text{O}_2\text{Br}$  ( $[\text{M}+\text{H}]^+$ ): 465.2363, found: 465.2365; **optical rotation:**  $\alpha_{\text{D}_{20}} = -111^\circ$  (1.00,  $\text{CHCl}_3$ ).

### 3.3.20 Bis-2,6-bis(((1R,2S,5R)-2-isopropyl-5-methylcyclohexyl)oxy)benzene diselenide (14a)

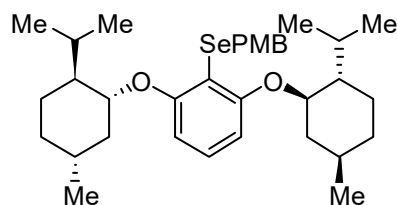

(1S,1'S,2R,2'R,4R,4'R)-2,2'-((2-Bromo-1,3-phenylene)bis(oxy))bis-(1-isopropyl-4-methylcyclohexane) (**13a**) (467 mg, 0.32 mmol, 1.00 equiv.) was dissolved in dry diethyl ether (1.1 mL) and cooled to -78°. *t*-Butyllithium (1.9 M in pentane, 425  $\mu\text{L}$ , 820  $\mu\text{mol}$ , 2.52 equiv.) was

slowly added and the mixture was stirred for 1 h at 0 °C. A solution of  $\text{PMBSeCN}$  (98 mg, 430  $\mu\text{mol}$ , 1.33 equiv.) in THF (2 mL) was added to the solution and the mixture was stirred for further 15 min. Then the reaction is quenched by the addition of sat. aq.  $\text{NH}_4\text{Cl}$ -sol. (4 mL) and extracted with EtOAc (2 x 5 mL). The organic phase was washed with brine (3 mL), dried over  $\text{Na}_2\text{SO}_4$  and the solvent was removed under reduced pressure. Column chromatography ( $\text{SiO}_2$ , pentane  $\rightarrow$  50:1 pentane/EtOAc) provided the title product as yellow oil (66 mg, 0.126 mmol, 35%).

**TLC:**  $R_f$  (50:1 Pent/Et<sub>2</sub>O) = 0.38; **IR** (ATR)  $\tilde{\nu}$  = 2952, 2923, 2867, 1609, 1578, 1509, 1453, 1369, 1299, 1246, 1231, 1173, 1098, 1068, 1053, 829, 764, 741, 712  $\text{cm}^{-1}$ ;  **$^1\text{H-NMR}$**  (400 MHz,  $\text{CDCl}_3$ )  $\delta$  (ppm) = 7.19 - 7.09 (m, 3 H), 6.78 - 6.73 (m, 2 H), 6.49 (d,  $^3J$  = 8.4 Hz, 2 H), 4.16 (d,  $^3J$  = 10.9 Hz, 1 H), 4.11-4.01 (m, 3 H), 3.76 (s, 3 H), 2.32 (dq,  $^3J$  = 13.7, 6.9, 3.5 Hz, 2 H), 2.16-2.03 (m, 2 H), 1.72 (ddt,  $^3J$  = 11.1, 8.3, 3.9 Hz, 4 H), 1.65 - 1.56 (m, 2 H), 1.43 (dddd,  $^3J$  = 15.3, 12.3, 6.3 Hz,  $^4J$  = 3.2 Hz, 2 H), 1.17 - 0.96 (m, 6 H), 0.96 - 0.88 (m, 12 H), 0.75 (d,  $^3J$  = 6.9 Hz, 6 H);  **$^{13}\text{C-NMR}$**

(101 MHz, CDCl<sub>3</sub>)  $\delta$  (ppm) = 159.4, 158.3, 132.1, 130.1, 128.8, 113.8, 105.5, 78.3, 77.2, 55.3, 48.1, 40.4, 34.7, 31.6, 29.9, 26.1, 23.6, 22.3, 21.1, 16.6; <sup>77</sup>Se-NMR (76 MHz, CDCl<sub>3</sub>):  $\delta$  (ppm) = 231.8; **HR-ESI-MS**  $m/z$  calc. for C<sub>52</sub>H<sub>32</sub>O<sub>8</sub>P<sub>2</sub>Se<sub>2</sub>Na ([M+Na]<sup>+</sup>): 587.3001, found: 587.2983; **optical rotation**:  $\alpha^{D_{20}} = 40^\circ$  (c = 0.37, CHCl<sub>3</sub>).

### 3.3.21 (((1*S*,1'*S*,2*R*,2'*R*,4*R*,4'*R*)-((2-Bromo-1,3-phenylene)bis(oxy))bis(4-methylcyclohexane-2,1-diyl))bis(propane-2,2-diyl)dibenzene (13b)<sup>[10]</sup>

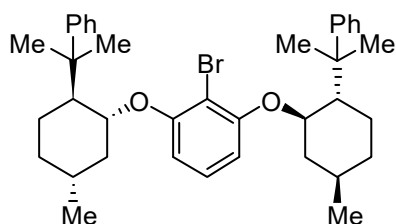

(-)-8-Phenylmenthol (1.18 g, 5.01 mmol, 2.56 equiv.) and 1-bromo-2,6-difluorobenzene (376 mg, 1.96 mmol, 1.00 equiv.) were dissolved in dry DMF (7.5 mL) and potassium *tert*-butoxide (1 M in THF, 5 mL, 5.00 mmol, 2.30 equiv.) was added dropwise to the solution. The mixture was stirred for 16 h at 100 °C. After cooling to rt quenched with H<sub>2</sub>O (5 mL), the mixture was extracted with Et<sub>2</sub>O (3 x 20 mL), the combined org. phases were washed with water (2 x 10 mL) and brine (10 mL), dried over Na<sub>2</sub>SO<sub>4</sub> and the solvent was removed under reduced pressure. Column chromatography (SiO<sub>2</sub>, pentane → 4:1 pentane:DCM) provided the title product as colorless solid (618 mg, 1.00 mmol, 51%). The mono-substituted product was also isolated (137 mg, 338  $\mu$ mol, 17%).

**TLC**:  $R_f$  (4:1 Pent/DCM) = 0.71; **T<sub>m</sub>**: 209 °C; **IR** (ATR)  $\tilde{\nu}$  = 2951, 2923, 2869, 1586, 1461, 1251, 1092, 1064, 1034, 907, 760, 734, 700 cm<sup>-1</sup>; **<sup>1</sup>H-NMR** (300 MHz, CDCl<sub>3</sub>)  $\delta$  (ppm) = 7.37 – 7.21 (m, 8H), 7.19 – 7.05 (m, 3H), 6.39 (d, J = 8.4 Hz, 2H), 4.18 (td, J = 10.3, 4.1 Hz, 2H), 2.19 – 1.94 (m, 4H), 1.52 (d, J = 10.4 Hz, 8H), 1.42 (s, 10H), 1.22 – 0.74 (m, 10H); **<sup>13</sup>C-NMR** (126 MHz, CDCl<sub>3</sub>)  $\delta$  (ppm) = 155.0, 150.0, 127.7, 127.4, 126.2, 125.1, 105.2, 103.9, 78.4, 51.5, 40.8, 40.5, 34.8, 31.5, 31.4, 27.5, 24.5, 21.9; **HR-ESI-MS**  $m/z$  calc. for C<sub>38</sub>H<sub>50</sub>O<sub>2</sub>Br ([M+H]<sup>+</sup>): 617.2989, found: 617.2986; **optical rotation**:  $\alpha^{D_{20}} = -54^\circ$  (c = 0.09, CHCl<sub>3</sub>)

### 3.3.22 (2,6-Bis(((1*R*,2*S*,5*R*)-5-methyl-2-(2-phenylpropan-2-yl)cyclohexyl)oxy)phenyl)(4-methoxybenzyl)selane (14b)

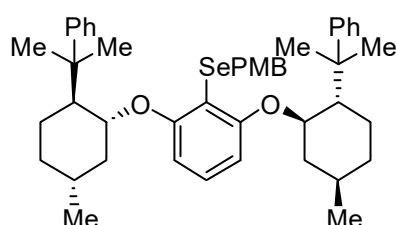

(((1*S*,1'*S*,2*R*,2'*R*,4*R*,4'*R*)-((2-Bromo-1,3-phenylene)bis(oxy))bis(4-methylcyclohexane-2,1-diyl))bis(propane-2,2-diyl)dibenzene (**13b**) (100 mg, 162  $\mu$ mol, 1.00 equiv.) is dissolved in dry diethyl ether (2 mL) and *n*-butyllithium (2.5 M in hexane, 71  $\mu$ L, 178  $\mu$ mol, 1.10 equiv.) was added at rt. The mixture was stirred for 1 h at 45 °C and a solution of PMBSeCN (68 mg, 243  $\mu$ mol, 1.50 equiv.) in dry diethyl ether (1.5 mL) was added to the solution. The mixture was stirred for 16 h at 40 °C. The reaction was quenched by the addition of sat. aq. NH<sub>4</sub>Cl, the mixture was extracted with DCM

(3 x 10 mL), the combined org. phases were dried over Na<sub>2</sub>SO<sub>4</sub> and the solvent was removed under reduced pressure. Column chromatography (SiO<sub>2</sub>, 4:1 pentane/DCM) provided the title product as a yellow oil (27 mg, 36.0 μmol, 22%).

**TLC:** *R<sub>f</sub>* = 0.37 (4:1 Pent:DCM); **IR** (ATR)  $\tilde{\nu}$  = 2953, 2923, 2869, 2369, 2359, 2342, 1579, 1510, 1453, 1246, 1226, 1092, 1061, 1036, 801, 763, 700 cm<sup>-1</sup>; **<sup>1</sup>H-NMR** (500 MHz, CDCl<sub>3</sub>)  $\delta$  (ppm) = 7.37 – 7.31 (m, 4 H), 7.31 – 7.24 (m, 4 H), 7.24 – 7.20 (m, 2 H), 7.19 – 7.11 (m, 3 H), 6.80 (d, <sup>3</sup>*J* = 8.6 Hz, 2 H), 6.43 (d, <sup>3</sup>*J* = 8.4 Hz, 2 H), 4.25 (d, <sup>3</sup>*J* = 10.8 Hz, 1 H), 4.17 (td, <sup>3</sup>*J* = 10.3, 4.0 Hz, 2 H), 4.00 (d, <sup>3</sup>*J* = 10.7 Hz, 1 H), 3.77 (s, 3 H), 2.11 – 1.98 (m, 4 H), 1.62 – 1.19 (m, 24 H), 1.13 – 0.74 (m, 16 H); **<sup>13</sup>C-NMR** (126 MHz, CDCl<sub>3</sub>)  $\delta$  (ppm) = 158.2, 150.1, 131.9, 130.0, 128.7, 127.8, 126.3, 125.2, 113.7, 111.5, 105.2, 78.4, 55.2, 51.6, 40.8, 40.5, 34.7, 31.5, 31.4, 30.2, 27.5, 24.4, 21.8, 1.0; **HR-ESI-MS** *m/z* calc. for C<sub>42</sub>H<sub>59</sub>O<sub>2</sub>Se ([M+H]<sup>+</sup>): 675.3679, found: 675.3671; **optical rotation:**  $\alpha^{D_{20}} = -34^{\circ}$  (c = 0.53, CHCl<sub>3</sub>).

### 3.3.23 1,2-Bis(2-((S)-4-isopropyl-4,5-dihydrooxazol-2-yl)phenyl)diselane(4)<sup>[13]</sup>

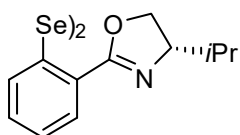

The compound was synthesized according to literature. The spectroscopic data are in accordance with literature.

**IR** (ATR)  $\tilde{\nu}$  = 2956, 2929, 2872, 1643, 1463, 1354, 1247, 1019, 967, 732 cm<sup>-1</sup>; **<sup>1</sup>H-NMR** (300 MHz, CDCl<sub>3</sub>)  $\delta$  (ppm) = 7.83 (m, 4 H), 7.24 (m, 4 H), 4.48 (dd, <sup>2</sup>*J* = 8.7 Hz, <sup>3</sup>*J* = 7.7 Hz, 2 H), 1.86 (hept, <sup>3</sup>*J* = 7.7 Hz, 2 H), 4.22 (m, 4 H), 1.12 (m, 6 H), 1.03 (m, 6 H); **HR-ESI-MS** *m/z* calc. for C<sub>24</sub>H<sub>29</sub>O<sub>2</sub>N<sub>2</sub>Se<sub>2</sub> ([M+H]<sup>+</sup>): 537.0558, found: 537.0543.

### 3.3.24 (R)-tert-Butyl((6-methoxy-7-((4-methoxybenzyl)selanyl)-2,2-dimethyl-2,3-dihydro-1H-inden-1-yl)oxy)dimethylsilane (23)<sup>[14]</sup>

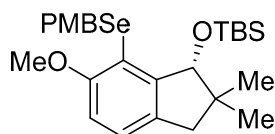

The compound was synthesized according to the literature: spectroscopic data are in accordance with literature

**TLC:** *R<sub>f</sub>* (1:1 DCM:Pent) = 0.65; **IR** (ATR)  $\tilde{\nu}$  = 2953, 2928, 2855, 1609, 1510, 1460, 1434, 1247, 1173, 1063, 1039, 834, 774 cm<sup>-1</sup>; **<sup>1</sup>H-NMR** (400 MHz, CDCl<sub>3</sub>)  $\delta$  (ppm) = 7.06 (d, <sup>3</sup>*J* = 8.2 Hz, 1 H), 6.96 (d, <sup>3</sup>*J* = 8.6 Hz, 1 H), 6.73 (d, <sup>3</sup>*J* = 8.1 Hz, 1 H), 6.66 (d, <sup>3</sup>*J* = 8.6 Hz, 2 H), 4.40 (s, 1 H), 4.09 (d, <sup>3</sup>*J* = 11.5 Hz, 1 H), 3.90 (s, 3 H), 3.86 (d, <sup>3</sup>*J* = 11.6 Hz, 1 H), 3.71 (s, 3 H), 2.95 (d, <sup>3</sup>*J* = 14.3 Hz, 1 H), 2.27 (d, <sup>3</sup>*J* = 14.7 Hz, 1 H), 1.13 (s, 3 H), 0.80 (s, 9 H), 0.50 (s, 3 H), 0.10 (s, 3 H), -0.04 (s, 3 H); **<sup>13</sup>C-NMR** (101 MHz, CDCl<sub>3</sub>)  $\delta$  (ppm) = 158.2, 158.1, 152.1, 136.8, 131.9, 129.6, 125.7, 115.4, 113.6, 110.2, 85.2, 56.3, 55.2, 44.8, 44.7, 30.3, 26.2, 26.1, 23.5, 18.6, -3.2, -3.5; **<sup>77</sup>Se-NMR** (76 MHz, CDCl<sub>3</sub>)  $\delta$  (ppm) = 269.61; **HR-ESI-MS** *m/z* calc for [C<sub>26</sub>H<sub>38</sub>O<sub>3</sub>SeSiNa]<sup>+</sup> [M+Na]<sup>+</sup>: 529.1649, found: 529.1648. **optical rotation**  $\alpha^{D_{20}} = 155^{\circ}$  (c = 1.01, CHCl<sub>3</sub>).

## 3.4 Photocatalysts

### 3.4.1 2,4,6-Tris(4-methoxyphenyl)pyrylium tetrafluoroborate (TAPT)<sup>[15]</sup>

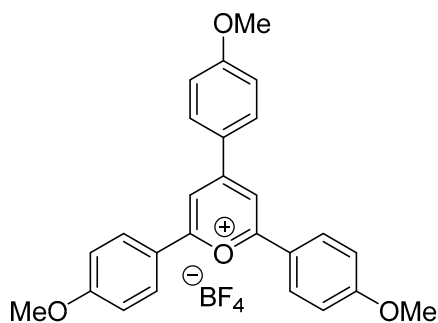

This compound was synthesized according to literature:

Spectra are in accordance to literature.

**IR** (ATR)  $\tilde{\nu}$  = 2941, 2841, 1585, 1482, 1457, 1434, 1258, 1235, 1174, 1016, 829, 562, 518  $\text{cm}^{-1}$ ; **<sup>1</sup>H-NMR** (300 MHz, DMSO- $\text{D}_6$ )  $\delta$  (ppm) = 8.54 (s, 2 H), 8.43 (d,  $J$  = 9.1 Hz, 2 H), 8.29 (d,  $J$  = 9.0 Hz, 4 H), 7.04-7.21 (m, 6 H), 3.94 (s, 3 H), 3.91 (s, 6 H); **<sup>13</sup>C-NMR** (101 MHz, DMSO- $\text{D}_6$ )  $\delta$  (ppm) = 167.4, 165.2, 164.4, 161.5, 132.2, 130.4, 124.2, 121.0, 115.2, 115.1, 110.3, 55.9, 55.8; **HR-ESI-MS**  $m/z$  calc for  $[\text{C}_{26}\text{H}_{23}\text{O}_4]^+$   $[\text{M}]^+$ : 399.1591, found.: 399.1587.

### 3.4.2 2,4,6-Tris(4-methoxyphenyl)pyrylium tetraphenylborate (TATP)

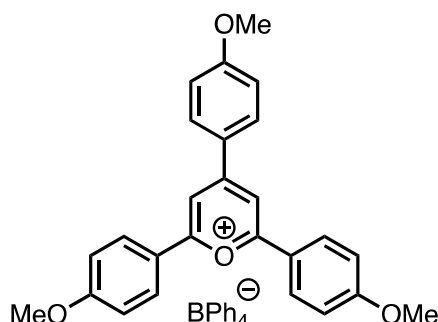

2,4,6-Tris(4-methoxyphenyl)pyrylium tetraphenylborate (300 mg, 617  $\mu\text{mol}$ , 1.00 equiv.) was dissolved in dry diethyl ether (10 mL), potassium tetraphenylborate was added (321 mg, 617  $\mu\text{mol}$ , 1.00 equiv.) and the mixture was stirred for 16 h at rt. THF (10 mL) was added and the suspension was filtered. The filtrate was collected and evaporation of the solvent provided the title compound as red solid (391 mg, 544  $\mu\text{mol}$ , 88%).

$T_m$  = 85.2  $^{\circ}\text{C}$ ; **IR** (ATR)  $\tilde{\nu}$  = 1584, 1569, 1509, 1478, 1457, 1436, 1304, 1257, 1240, 1171, 1121, 1018, 830, 732, 703  $\text{cm}^{-1}$ ; **<sup>1</sup>H-NMR** (300 MHz,  $\text{CDCl}_3$ )  $\delta$  (ppm) = 7.76 (d,  $^3J$  = 8.8 Hz, 4 H), 7.58 – 7.44 (m, 12 H), 6.96 (t,  $^3J$  = 7.4 Hz, 12 H), 6.82 (q,  $^3J$  = 8.2, 7.2 Hz, 6 H), 3.87 (s, 6 H), 3.85 (s, 3 H); **<sup>13</sup>C-NMR** (75 MHz,  $\text{CDCl}_3$ )  $\delta$  (ppm) = 168.0, 165.9, 165.3, 164.6, 163.9, 163.3, 162.4, 136.2, 131.6, 130.2, 128.8, 127.2, 125.7, 125.7, 125.6, 125.6, 124.1, 121.7, 120.6, 115.9, 115.8, 110.3, 56.2, 56.1; **<sup>11</sup>B-NMR** (96 MHz,  $\text{CDCl}_3$ )  $\delta$  = -6.42; **HR-ESI-MS**  $m/z$  Cation: calc for  $[\text{C}_{26}\text{H}_{23}\text{O}_4]^+$   $[\text{M}]^+$ : 399.1591, found.: 399.1589, Anion: calc for  $[\text{C}_{24}\text{H}_{20}\text{B}]^-$   $[\text{M}]^-$ : 319.1700, found.: 318.1693.

### 3.4.3 10-(3,5-Dimethoxyphenyl)-9-mesityl-1,3,6,8-tetramethoxyacridin-10-ium tetrafluoroborate (DMTA)<sup>[16]</sup>

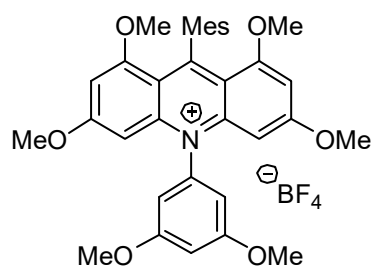

This compound was synthesized according to literature:

Spectra are in accordance to literature.

**IR** (ATR)  $\tilde{\nu}$  = 3030, 2968, 2937, 2878, 2251, 1655, 1461, 1417, 1287, 1072, 969, 907, 865, 793, 730  $\text{cm}^{-1}$ ; **<sup>1</sup>H-NMR** (300 MHz,  $\text{CDCl}_3$ )  $\delta$  (ppm) = 6.90 (dd,  $^3J$  = 1.3, 0.7 Hz, 2 H), 6.83 (t,  $^3J$  = 2.2 Hz, 1 H), 6.60 (d,  $^3J$  = 2.2 Hz, 2 H), 6.50 (dd,  $^3J$  = 2.3, 0.5 Hz, 2 H), 6.18 (d,  $^3J$  = 2.3 Hz, 2 H), 3.92 (s, 6 H), 3.85 (s, 6 H), 3.53 – 3.45 (m, 6 H), 2.37 (s, 3 H), 1.83 (t,  $^4J$  = 0.6 Hz, 6 H); **<sup>13</sup>C-NMR** (101 MHz,  $\text{CDCl}_3$ )  $\delta$  (ppm) = 168.3, 163.2, 162.3, 160.7, 144.7, 139.8, 137.5, 136.4, 132.0, 127.0, 113.3, 105.6, 102.8, 97.5, 92.8, 57.1, 56.5, 56.2, 21.1, 20.2; **HR-ESI-MS**  $m/z$  calc for  $[\text{C}_{34}\text{H}_{36}\text{O}_6]^+$   $[M]^+$ : 554.2537, found.: 554.2538.

## 3.5 Asymmetric lactonization

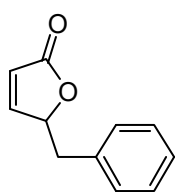

(*E*)-5-Phenylpent-3-enoic acid ( 1.00 equiv.), the photocatalyst (0.05 equiv.) and the selenium catalyst (0.05 equiv. for diselenides, 0.10 equiv. for monoselenides) were dissolved in acetonitrile (0.1 M). The mixture was stirred vigorously at rt and irradiated with blue light (465 nm, 4500 lx). The solvent was removed under reduced pressure and column chromatography ( $\text{SiO}_2$ , 1:2 pentane/DCM) provided the title product as light yellow oil.

**Table 2: Conditions used in the asymmetric aerobic lactonization.**

| entry           | Se-catalyst | photocatalyst | solvent | <i>T</i> | <i>t</i> | yield | <i>ee</i> |
|-----------------|-------------|---------------|---------|----------|----------|-------|-----------|
| 1               | <b>11b</b>  | TAPT          | MeCN    | 35°C     | 16h      | 70%   | 19%       |
| 2               | <b>11c</b>  | TAPT          | MeCN    | 35°C     | 16h      | 68%   | 49%       |
| 3               | <b>11c</b>  | TAPT          | acetone | 35°C     | 16h      | 10%   | nd        |
| 4               | <b>11c</b>  | TAPT          | DCE     | 35°C     | 16h      | 61%   | 25%       |
| 5               | <b>11c</b>  | TAPT          | MeCN    | 0°C      | 20h      | 65%   | 47%       |
| 6               | <b>11d</b>  | TAPT          | MeCN    | 20°C     | 16h      | 40%   | 55%       |
| 7               | <b>11d</b>  | TAPT          | DCE     | 20°C     | 19 h     | 38%   | 50%       |
| 8               | <b>11a</b>  | TAPT          | MeCN    | 35°C     | 16h      | 81%   | 5%        |
| 9               | <b>20</b>   | TAPT          | MeCN    | 35°C     | 16h      | 78%   | 10%       |
| 10              | <b>14b</b>  | TAPT          | MeCN    | 35°C     | 20h      | 24%   | 48%       |
| 11 <sup>a</sup> | <b>14b</b>  | TAPT          | MeCN    | 35°C     | 40h      | 59%   | 33%       |
| 12              | <b>14b</b>  | -             | PhMe    | 35°C     | 16h      | n.d.  | 37%       |
| 13              | <b>14b</b>  | DMTA          | PhMe    | 35°C     | 16h      | 33%   | 8%        |
| 14              | <b>14b</b>  | TAPT          | MeCN    | 50°C     | 96h      | 99%   | 24%       |
| 15              | <b>14b</b>  | TAPT          | MeCN    | 35°C     | 6h       | 23%   | 15%       |

|    |            |                                      |                               |      |     |     |     |
|----|------------|--------------------------------------|-------------------------------|------|-----|-----|-----|
| 16 | <b>14b</b> | TAPT                                 | MeCN                          | 0°C  | 16h | 21% | 20% |
| 17 | <b>14b</b> | Rhodamin G                           | MeCN                          | 35°C | 16h | 0%  | nd  |
| 18 | <b>14b</b> | Rhodamin G                           | MeCN                          | 35°C | 16h | 0%  | nd  |
| 19 | <b>14b</b> | Ru(bpz) <sub>3</sub> PF <sub>6</sub> | MeCN                          | 45°C | 16h | 19% | 4%  |
| 20 | <b>14b</b> | TATP                                 | MeCN                          | 35°C | 18h | 10% | 12% |
| 21 | <b>14b</b> | TATP                                 | MeCN                          | 35°C | 17h | 13% | 12% |
| 22 | <b>14b</b> | TAPT                                 | MeCN dry                      | 35°C | 16h | 35% | 16% |
| 23 | <b>14b</b> | TAPT                                 | MeCN/H <sub>2</sub> O<br>10:1 | 35°C | 16h | 0%  | nd  |
| 24 | <b>14a</b> | TAPT                                 | MeCN                          | 35°C | 16h | 40% | 55% |
| 25 | <b>4</b>   | TAPT                                 | MeCN                          | 35°C | 16h | 0%  | nd  |
| 26 | <b>23</b>  | TAPT                                 | MeCN                          | 0°C  | 48h | 10% | 65% |
| 27 | <b>23</b>  | TAPT                                 | MeCN                          | 0°C  | 88h | 44% | 67% |
| 28 | <b>23</b>  | DMTA                                 | PhMe                          | 35°C | 16h | 0%  | nd  |
| 30 | <b>23</b>  | NO[BF <sub>4</sub> ]                 | DCM                           | 25°C | 21h | 0%  | nd  |
| 31 | <b>23</b>  | NO[BF <sub>4</sub> ]                 | DCM                           | 25°C | 21h | 12% | 0%  |
| 32 | <b>7a</b>  | TAPT                                 | MeCN                          | 35°C | 16h | 44% | 22% |
| 33 | <b>7c</b>  | TAPT                                 | MeCN                          | 35°C | 16h | 11% | 0%  |

<sup>a</sup>Instead of the respective aryl-PMB-selenide **14b** its butyl-substituted analogue was used.

**R<sub>f</sub>**(Pent:Et<sub>2</sub>O)= 0.21; **IR** (ATR):  $\tilde{\nu}$  = 3030, 1748, 1602, 1496, 1455, 1337, 1160, 1099, 1023, 924, 900, 812, 748, 701 cm<sup>-1</sup>; **<sup>1</sup>H-NMR** (400 MHz, CDCl<sub>3</sub>):  $\delta$  = 7.40 (dd, <sup>3</sup>J = 5.7 Hz, <sup>4</sup>J = 1.5 Hz, 1 H), 7.37 – 7.24 (m, 3 H), 7.24 – 7.19 (m, 1 H), 6.08 (dd, <sup>3</sup>J = 5.7 Hz, <sup>4</sup>J = 2.0 Hz, 1 H), 5.27 – 5.20 (m, 1 H), 3.16 (dd, <sup>3</sup>J = 13.9, 6.4 Hz, 1 H), 2.96 (dd, <sup>3</sup>J = 13.9, 7.1 Hz, 1 H); **<sup>13</sup>C-NMR** (101 MHz, CDCl<sub>3</sub>):  $\delta$  = 172.7, 155.5, 134.8, 129.4, 128.7, 127.3, 122.1, 83.4, 39.6; **HR-ESI-MS** (m/z) calculated for C<sub>11</sub>H<sub>11</sub>O<sub>2</sub> [M+H]<sup>+</sup>: 175.0754 found: 175.0755; **HPLC**: Daicel OD, 0.9 mL/min, 99:1 Hex:*i*-PrOH *R<sub>T</sub>* = 49.160 min, 51.825 min; Daicel ID, 1.0 mL/min, 90.1:9.9 Hex: *i*-PrOH *R<sub>T</sub>* = 16.557 min, 17.644 min; Daicel ID, 0.8 mL/min, 90.1:9.9 Hex: *i*-PrOH *R<sub>T</sub>* = 23.469 min, 24.491 min.

## 4 Literature

- [1] I.Cho, L. Meimetis, R. Britton, *Org. Lett.* **2009**, *11*, 1903-1906.
- [2] K.S. Jeong, Y.S. Kim, Y.J. Kim, E. Lee, J.H. Yoon, W.H. Park, Y.W. Park, S.-J. Jeon, Z.H. Kim, J. Kim, N. Jeong, *Angew. Chem. Int. Ed.* **2006**, *45*, 8134-8138.
- [3] W.-D. Lee, K. Kim, G.A. Sulikowski, *Org. Lett.* **2005**, *7*, 1687-1689.
- [4] M. Lombardo, S.Morganti, C.Trombini, *J. Org. Chem.* **2000**, *65*, 8767-8773.
- [5] J. Trenner, C. Depken, T.J. Weber, A.Breder, *Angew. Chem. Int. Ed.* **2013**, *52*, 8952-8956.
- [6] S.M. Altermann, R.D. Richardson, T.K. Page, R.K. Schmidt, A. Holland, U. Mohammed, A.M. Paradine, A.N. French, C. Richter, A.M. Bahar, B. Witulski, T. Wirth, *Eur. J. Org.Chem.* **2008**, 5315-5328.
- [7] M. Shen, B. E. Leslie, T.G. Driver, *Angew. Chem. Int. Ed.* **2008**, *47*, 5056-5059.
- [8] M. Minozzi, D. Nanni, J. C. Walton, *J. Org. Chem.* **2004**, 2056-2069.
- [9] (a) N. Yasukawa, H. Yokoyama, M. Masuda, Y. Monguchi, H. Sajiki, Y. Sawama *Green-Chemistry*, **2018**, *20*, 1213. (b) J. Whitesell, R. Lawrence, H. Chen *J.Org.Chem.* **1986**, *51*, 4779. (c) M. Murakata, M. Tamura, O. Hoshino, *J.Org.Chem.* **1997**, *62*, 4428.
- [10] K. Kumazawa, K. Ishihara, H. Yamamoto, *Org. Lett.* **2004**, *6*, 2551-2554.
- [11] A. Kattuboina, Guigen Li, *Tetrahedron Lett.* **2008**, *49*, 1573-1577.
- [12] L. Zhao, Z. Li, T. Wirth, *Eur. J. Org. Chem.* **2011**, *35*, 7080-7082.
- [13] A. L. Braga, S. J. N. Silva, D. S. Lüdtkke, R. L. Drekenner, C. C. Silveira, J. B. T. Rochaa, L. A. Wessjohann, *Tetrahedron Lett.* **2002**, *43*, 7329-7331.
- [14] Y. Kawamata, T. Hashimoto, K. Maruoka *J. Am. Chem. Soc.*, **2016**, *138*, 5206-5209.
- [15] M. Martiny, E. Steckhan, T. Esch, *Chem. Ber.* **1993**, *126*, 1671-1682.
- [16] A. Joshi-Pangu, F. Lévesque, H.G. Roth, S.F. Oliver, L.-C. Campeau, D. Nicewicz, D. DiRocco, *J.Org.Chem.* **2016**, *81*, 7244-7249.

## 5 NMR Spectra

### 5.1 Diselenocine catalysts

#### 5.1.1 (11*R*,12*R*)-11,12-Dihydrodibenzo[*c,g*][1,2]diselenocin-11,12-diol (6)

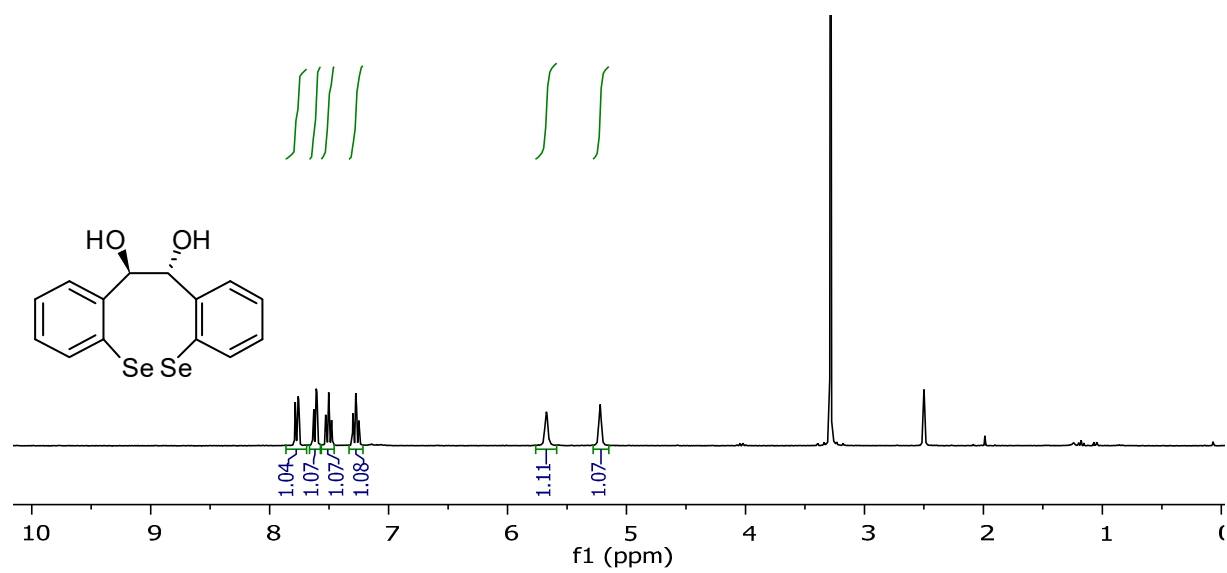

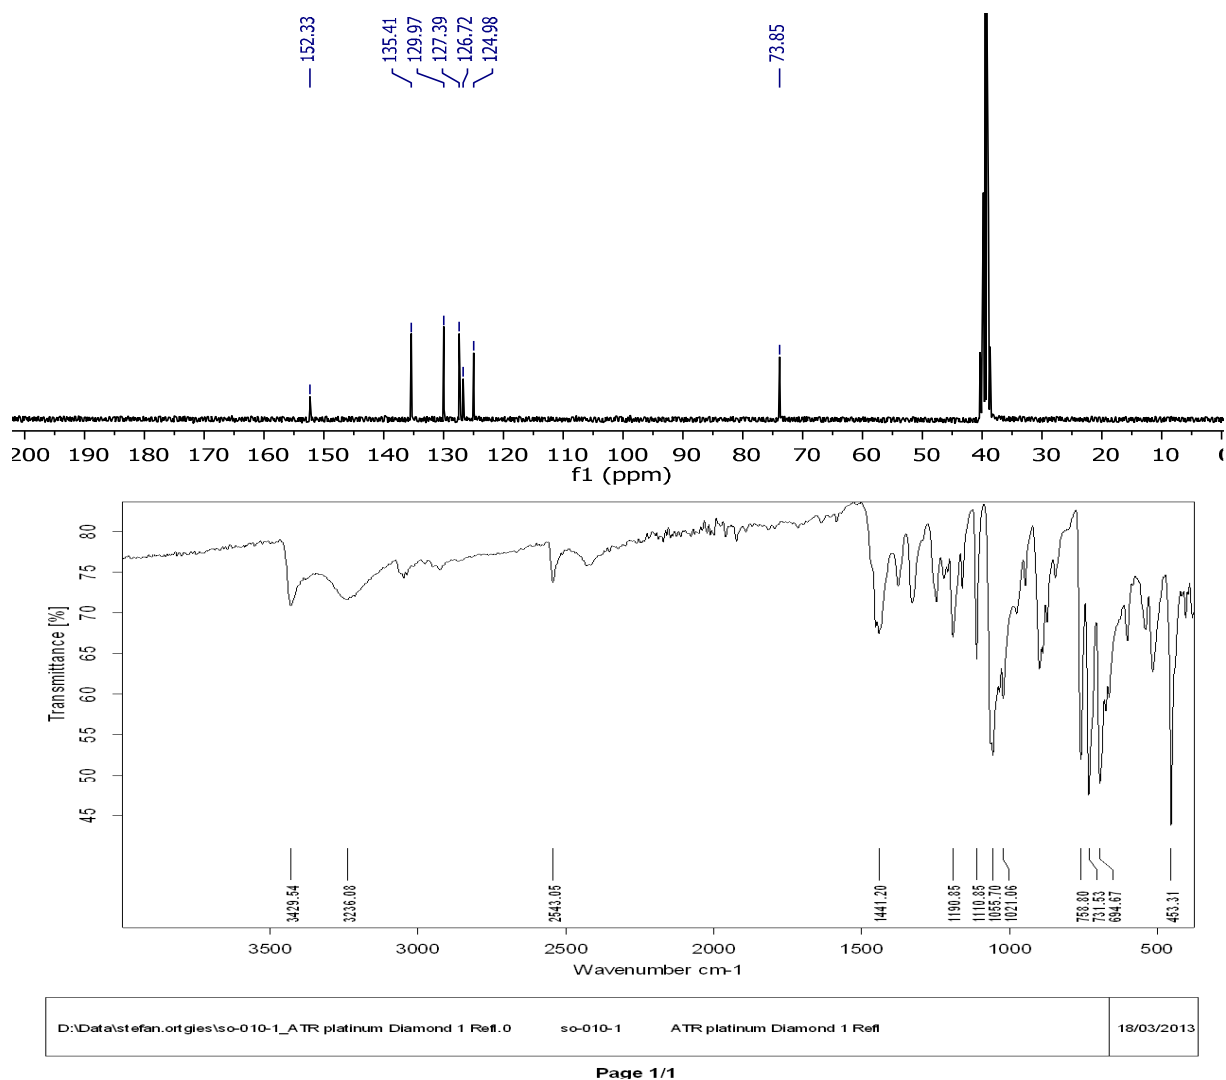

Page 1/1

### 5.1.2 (3aR,13bR)-2,2-Dimethyl-3a,13b-dihydrodibenzo[3,4:7,8][1,2]diselenocino-[5,6-d][1,3]dioxol (7a)

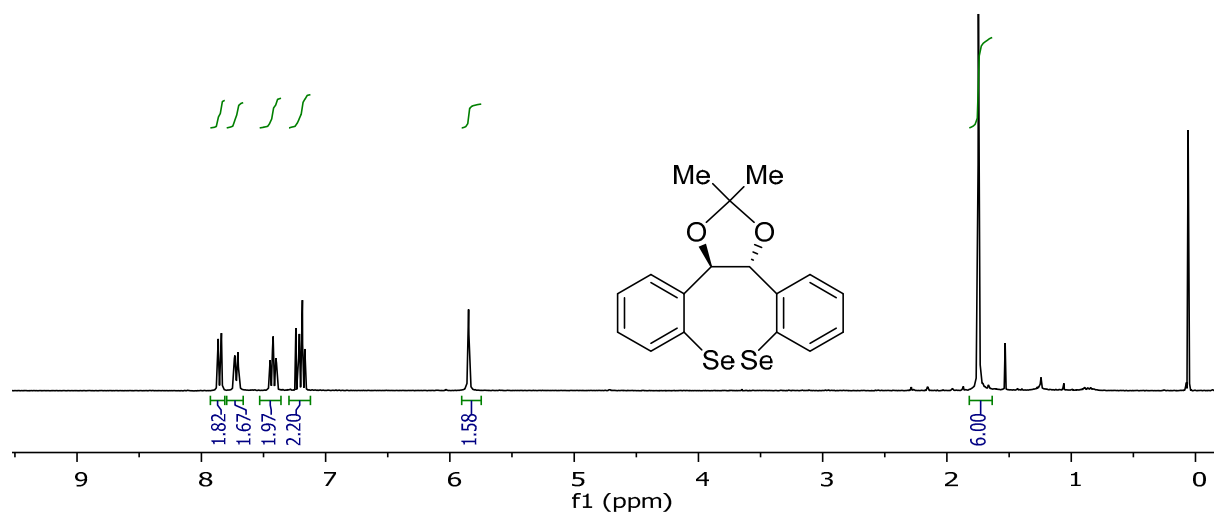

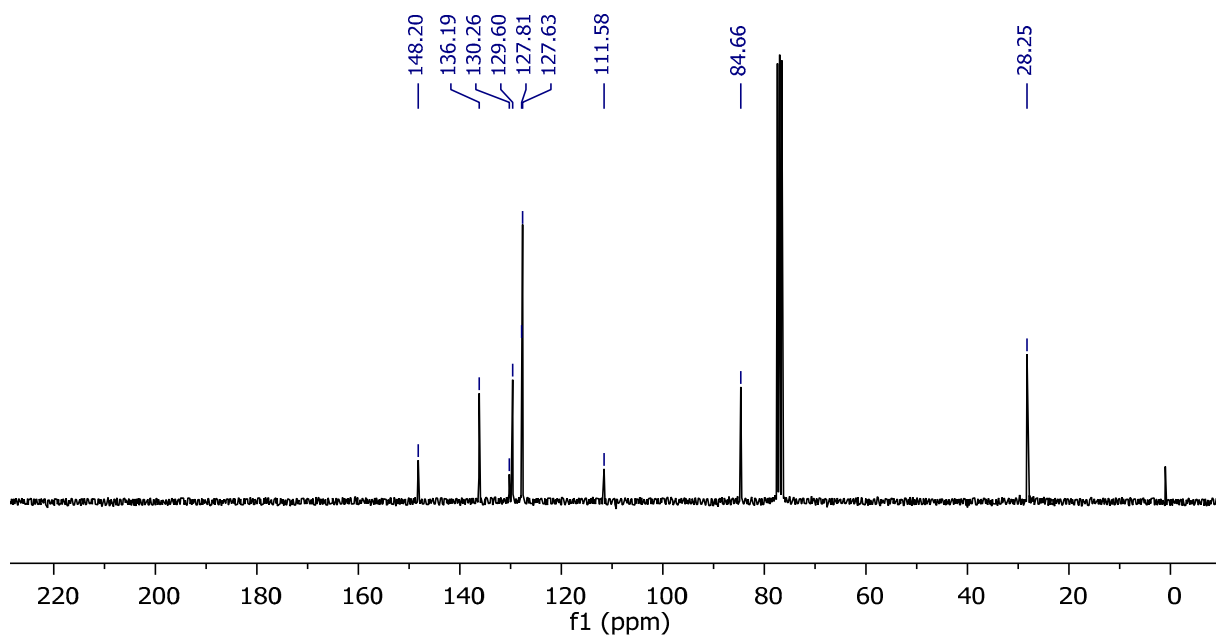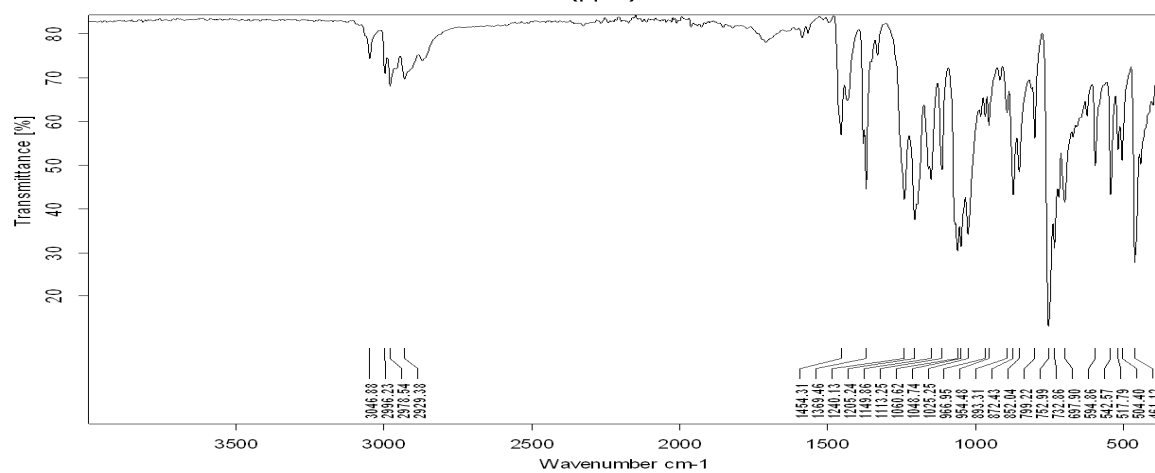

D:\Data\stefan.ortgies\so-015-1\_ATR platinum Diamond 1 Refl.0

so-015-1

ATR platinum Diamond 1 Refl

18/03/2013

### 5.1.3 (11R,12R)-11,12-Dihydrodibenzo[c,g][1,2]diselenocin-11,12-diyl dibenzoate (7d)

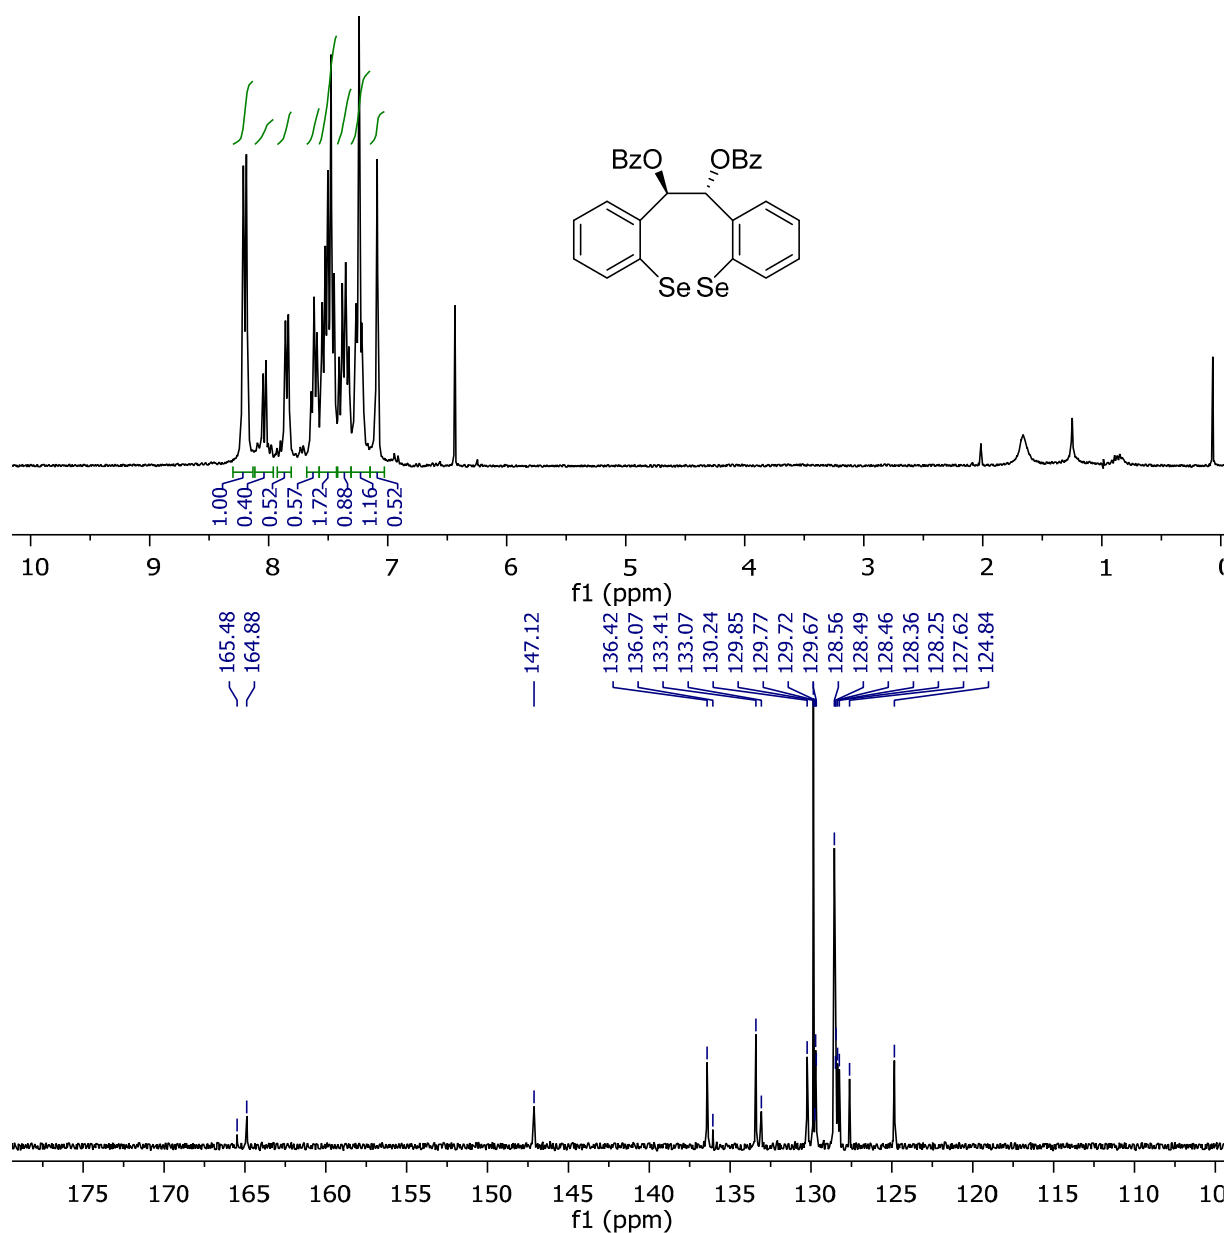

C

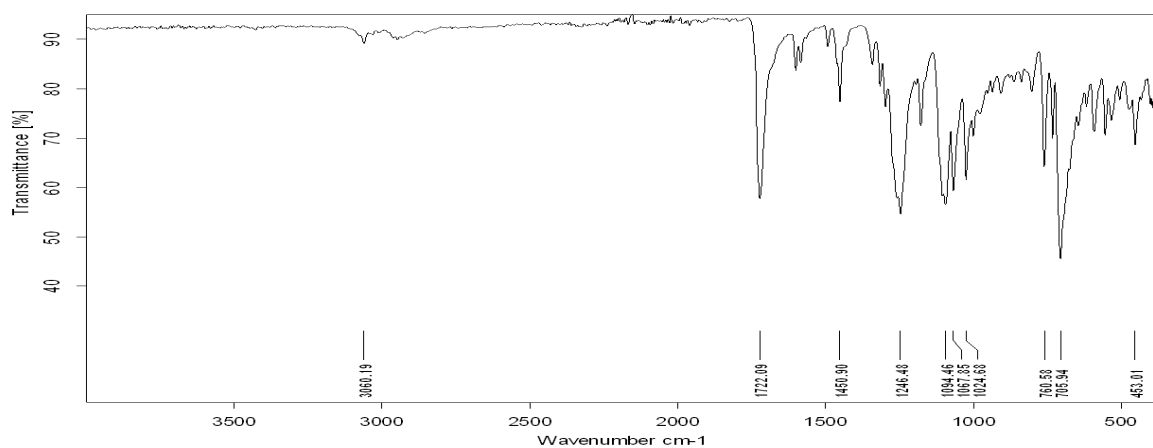

D:\Data\stefan.ortgies\so-126-1\_ATR platinum Diamond 1 Refl.0

so-126-1

ATR platinum Diamond 1 Refl

12/08/2013

### 5.1.4 (11*R*,12*R*)-11,12-Dihydrodibenzo[*c,g*][1,2]diselenocin-11,12-diylbis(2,2-dimethylpropanoat) (7b)

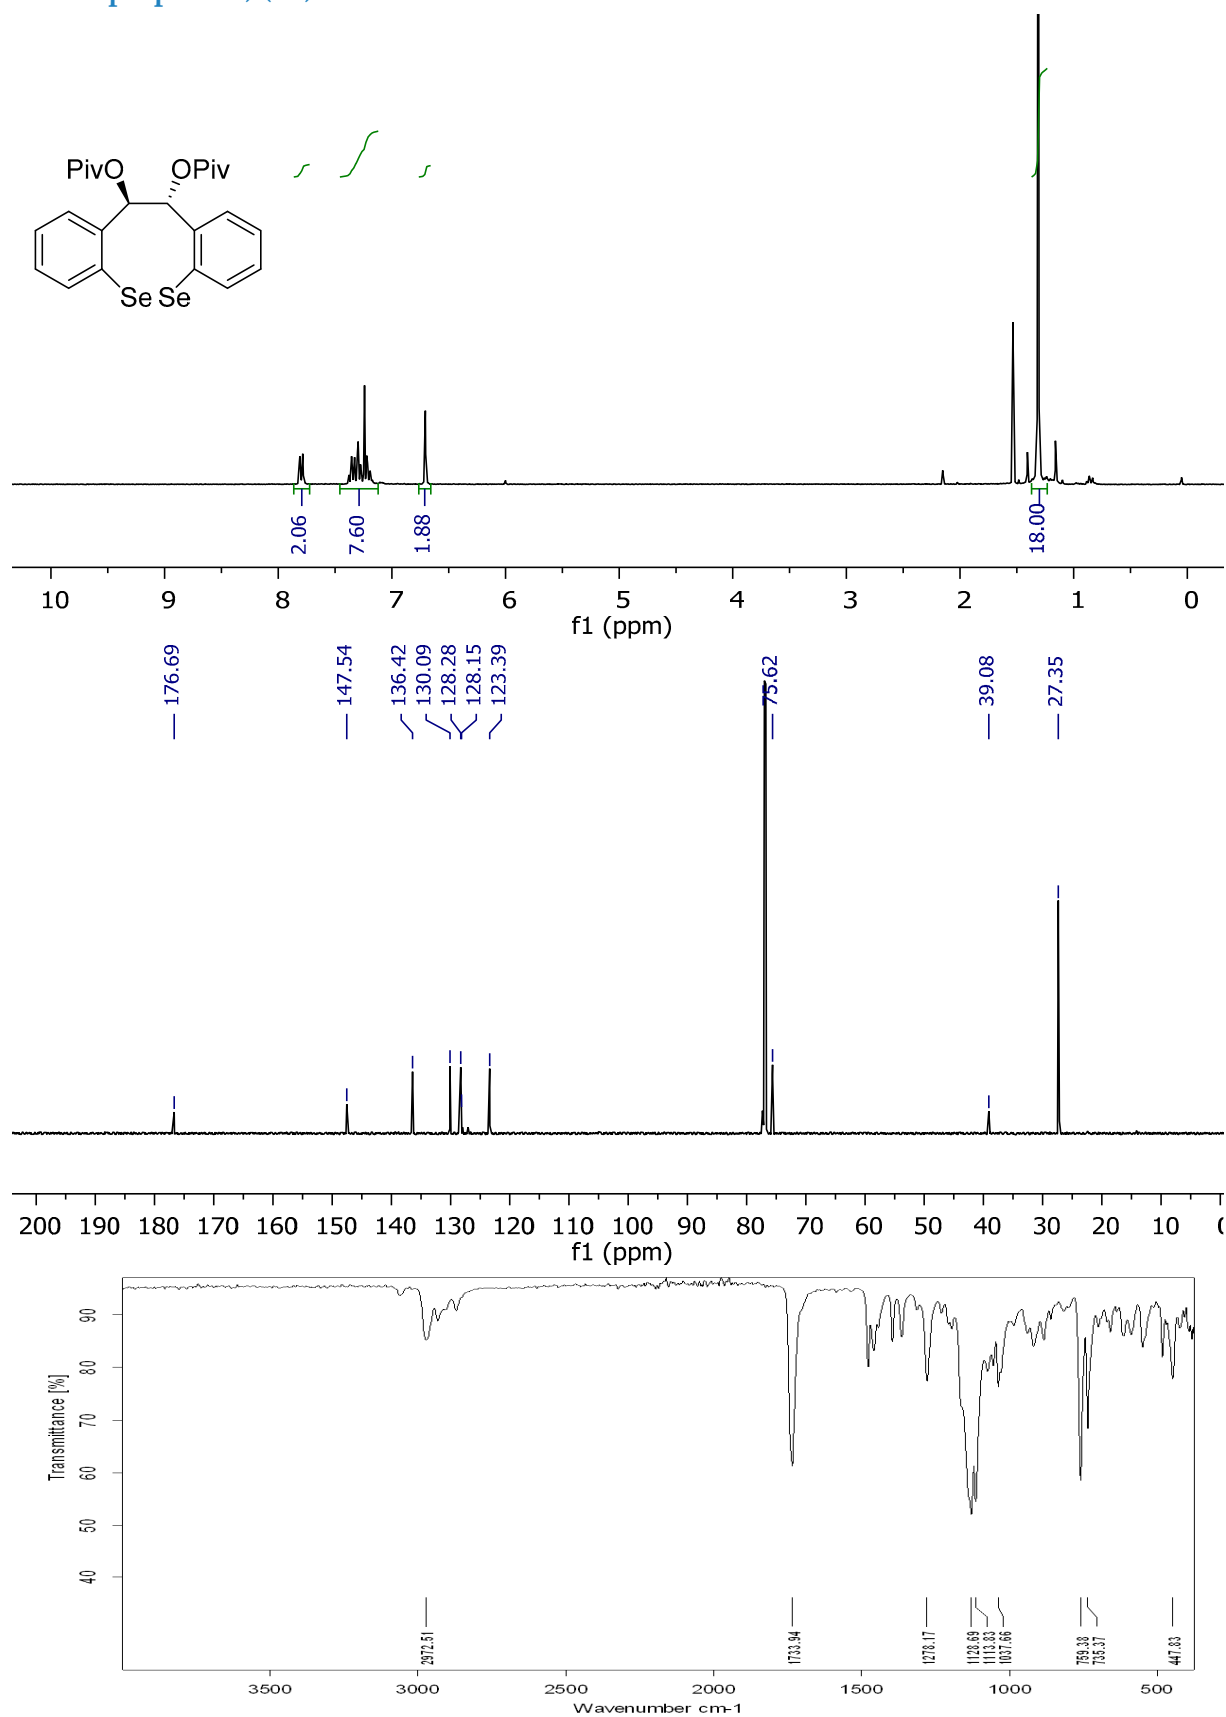

5.1.5 (3a*R*,13b*R*)-3a,13b-Dihydrodibenzo[3,4:7,8][1,2]diselenocino[5,6-d][1,3]dioxol-2-on  
(7c)

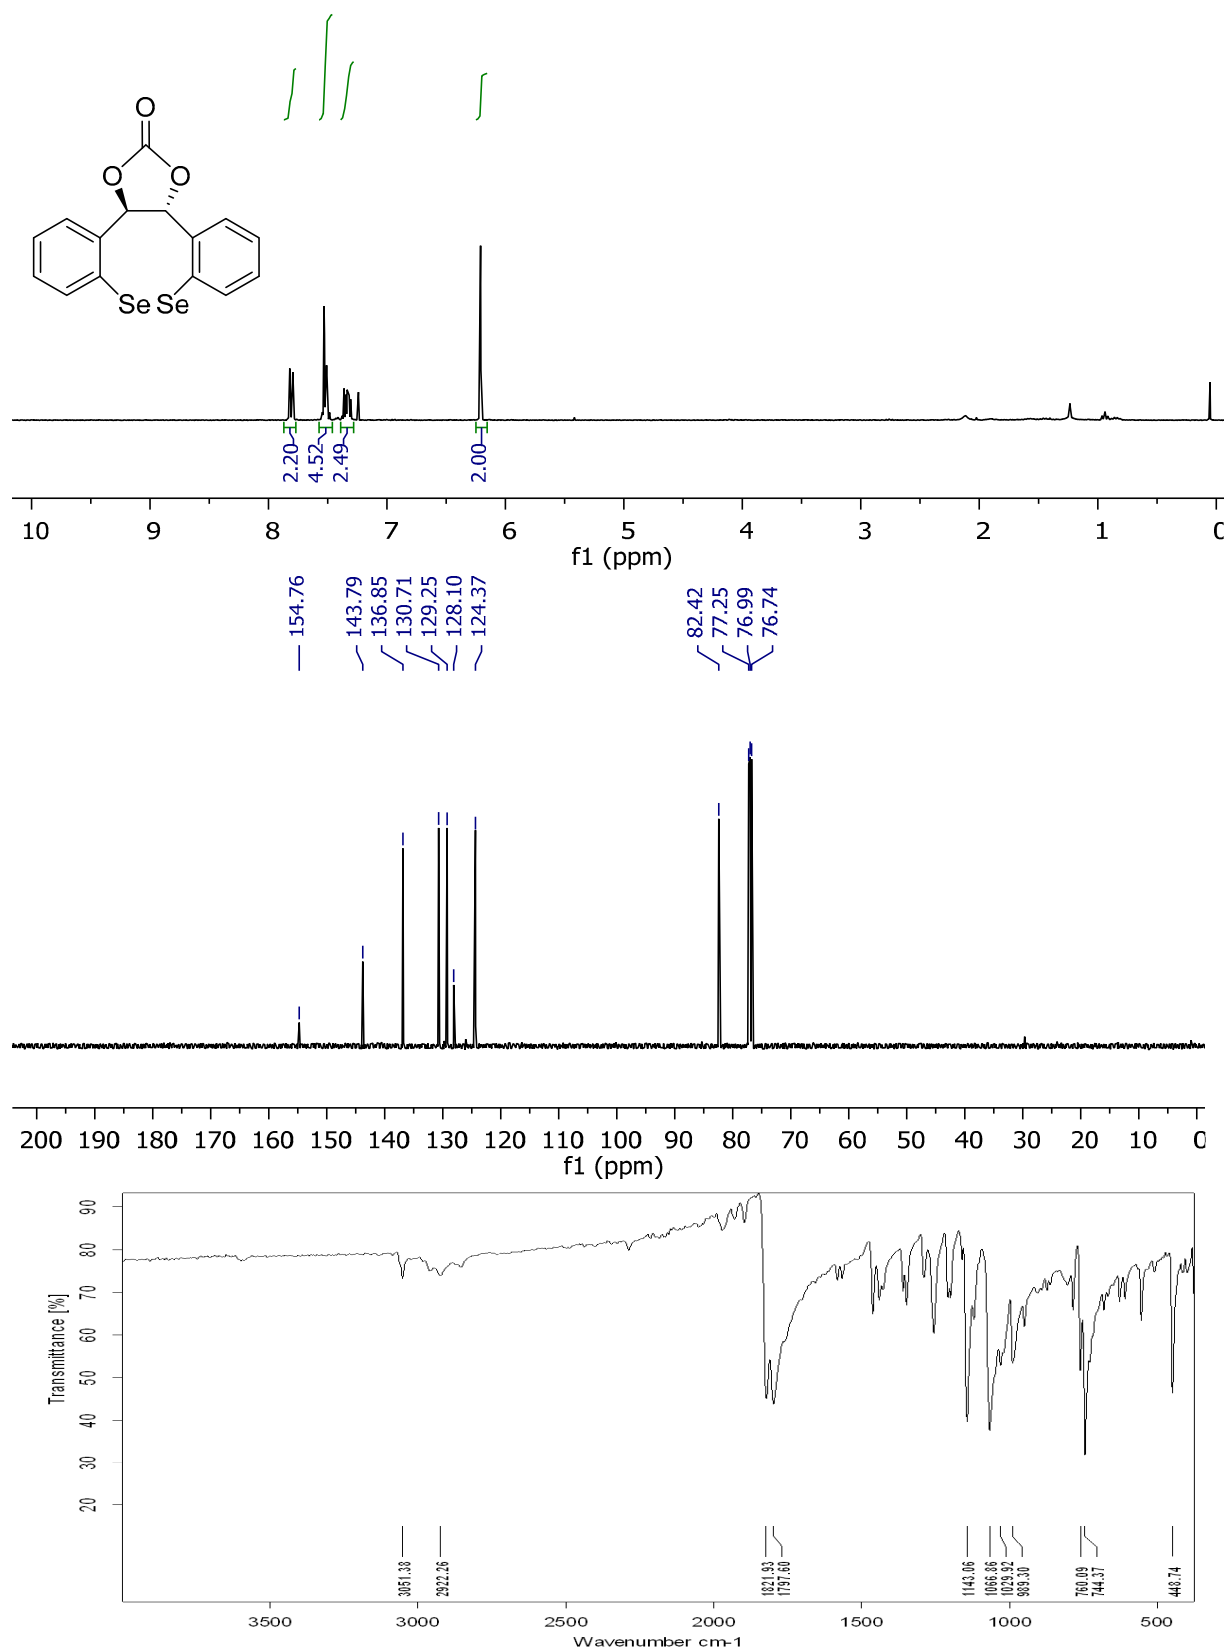



## 5.3 Alkoxy-catalysts

### 5.3.1 1-(((1*R*,2*S*,5*R*)-2-isopropyl-5-methylcyclohexyl)oxy)-2-nitrobenzene

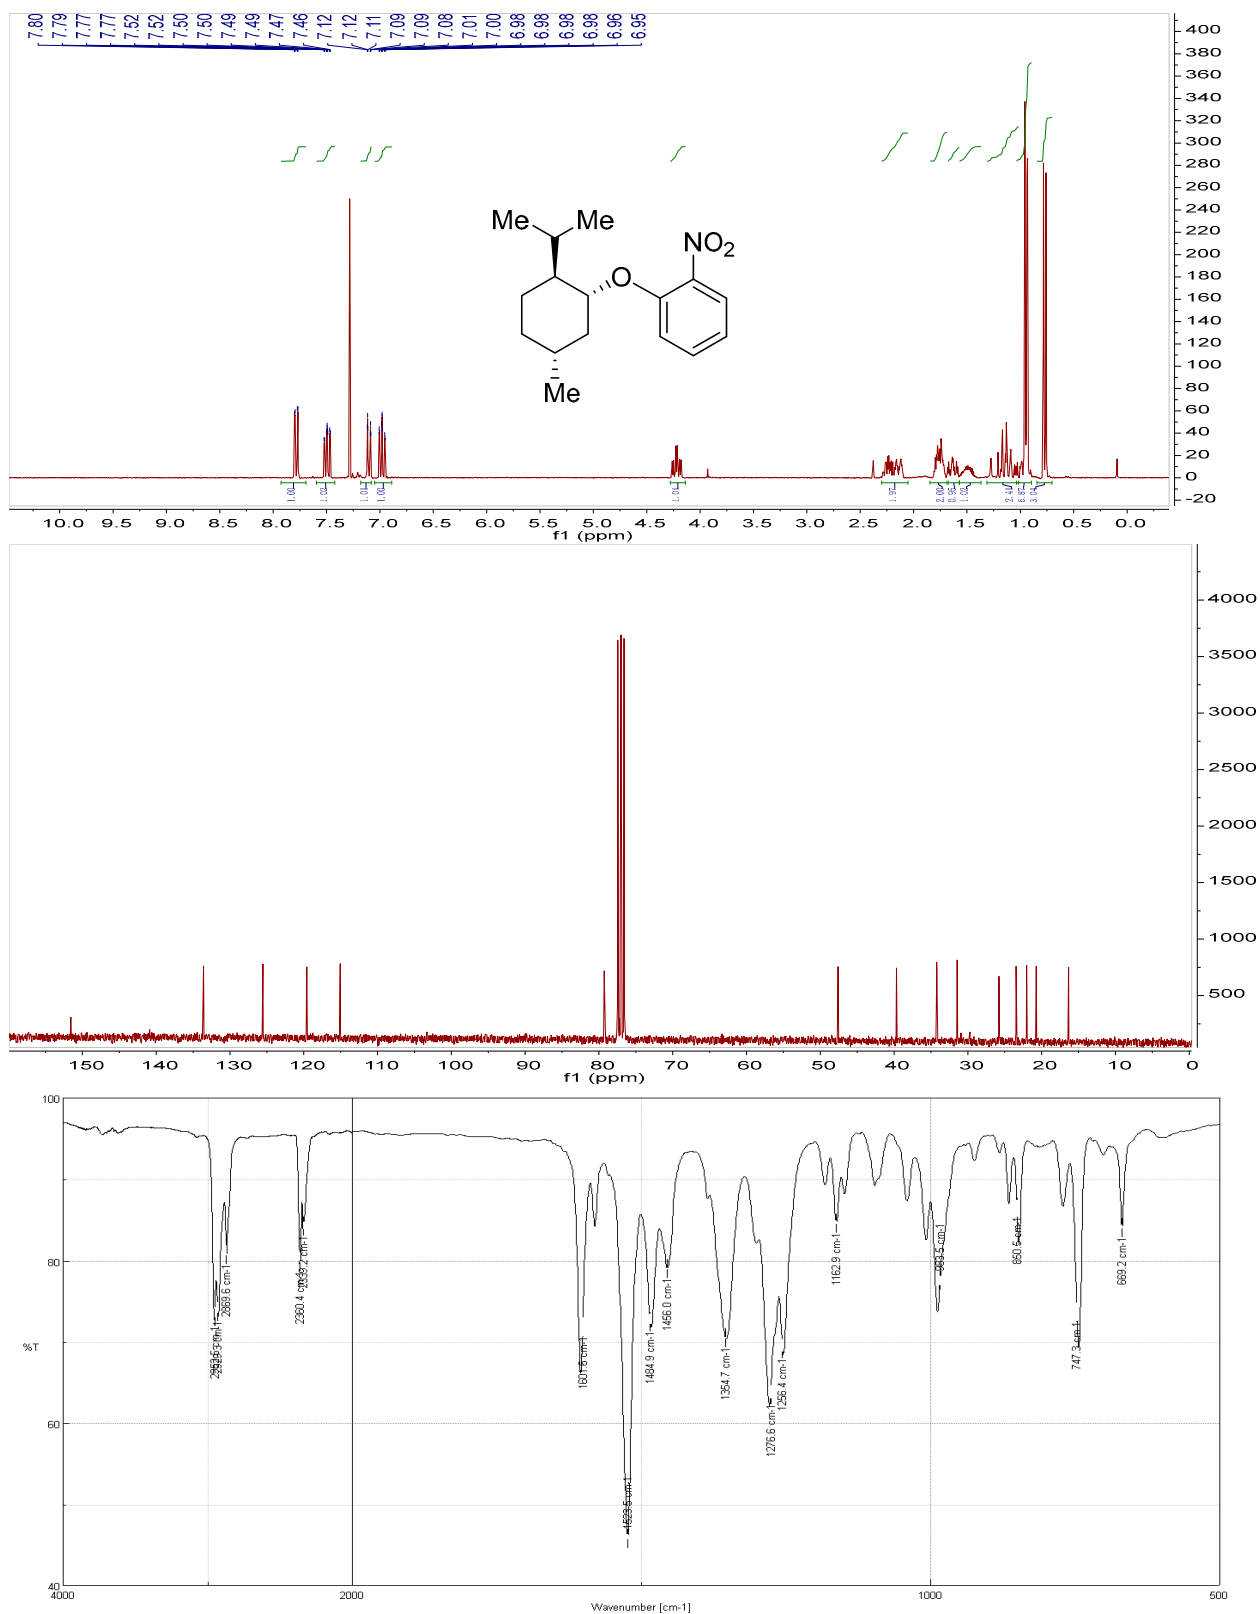

Chemical structure: C[C@H]1CCCC[C@@H]1C[C@H](C)Oc2ccc(N)cc2

<sup>1</sup>H NMR spectrum (400 MHz, CDCl<sub>3</sub>) data:

| Chemical Shift (ppm) | Integration |
|----------------------|-------------|
| 6.85 - 6.71          | 1.00        |
| 4.1                  | 0.94        |
| 2.4 - 2.1            | 0.94        |
| 1.6 - 1.4            | 0.94        |
| 1.1 - 0.9            | 0.94        |

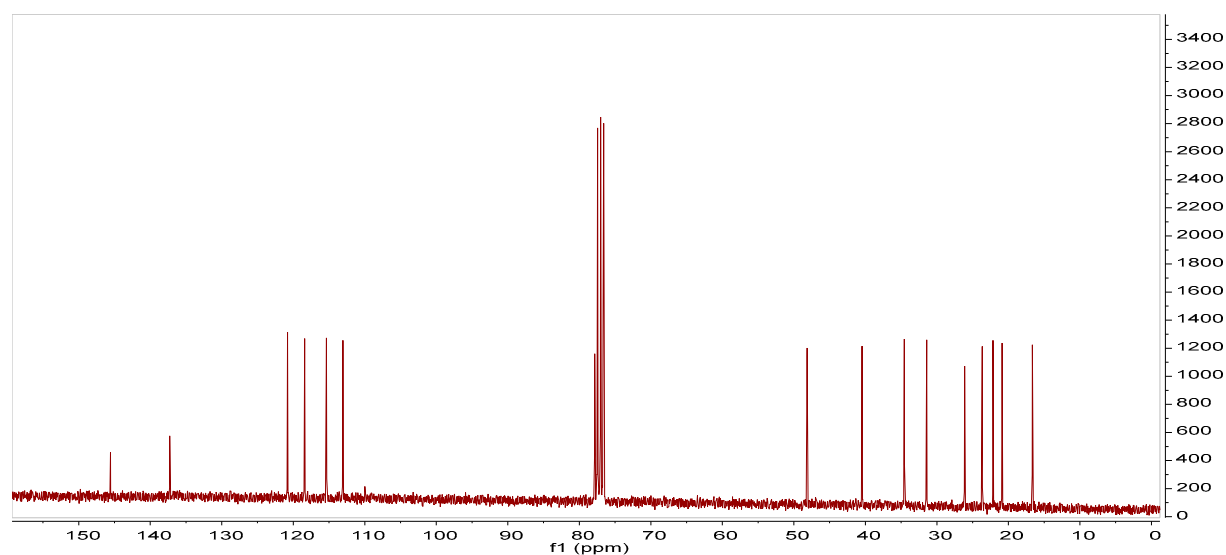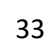

### 5.3.3 1-(((1*R*,2*S*,5*R*)-2-isopropyl-5-methylcyclohexyl)oxy)-2-selenocyanatobenzene (10b)

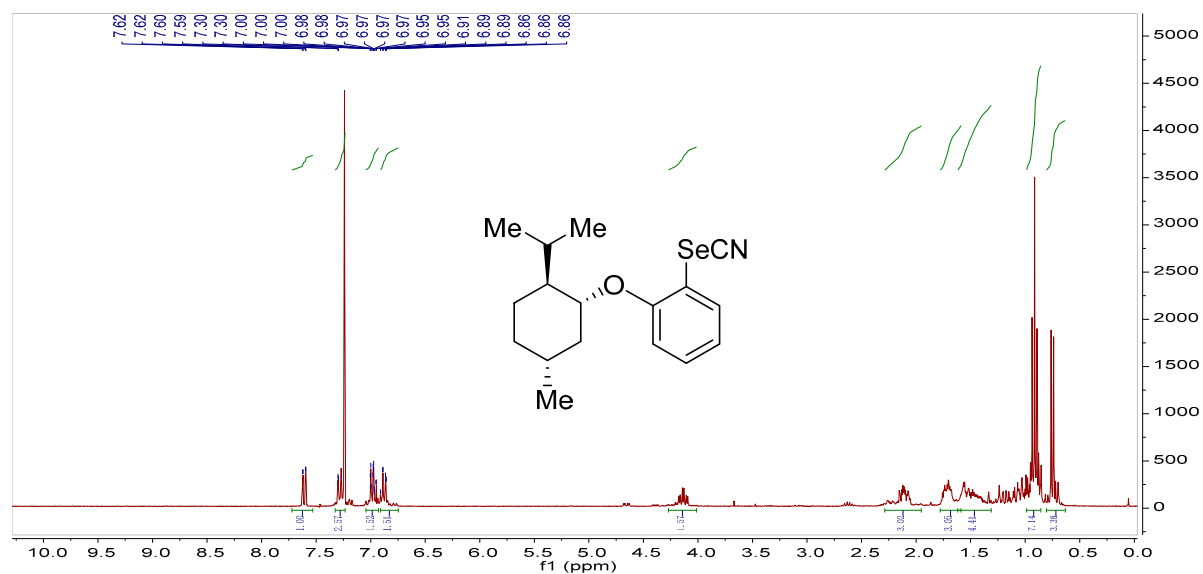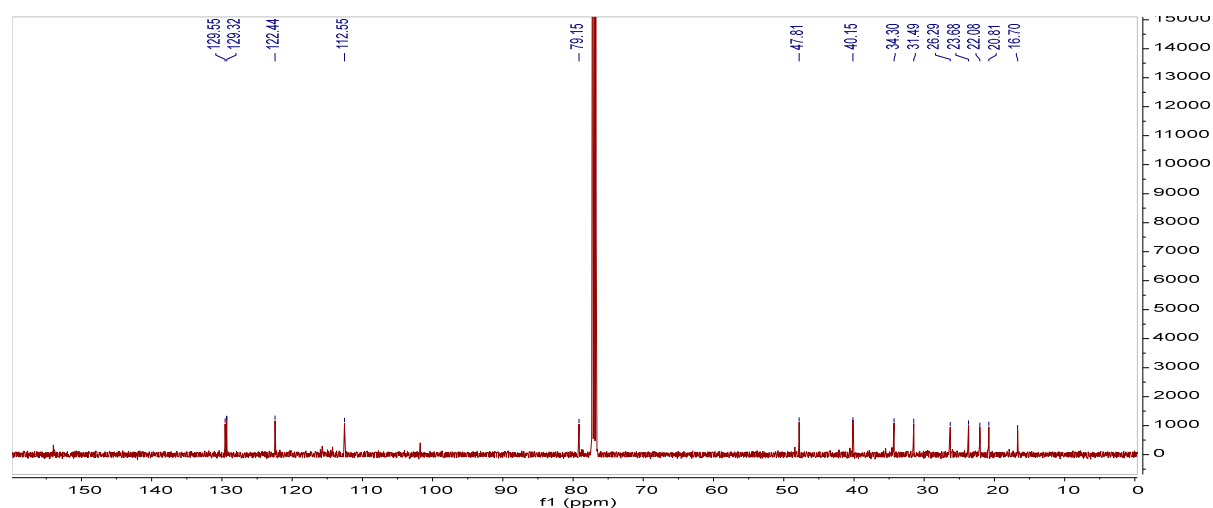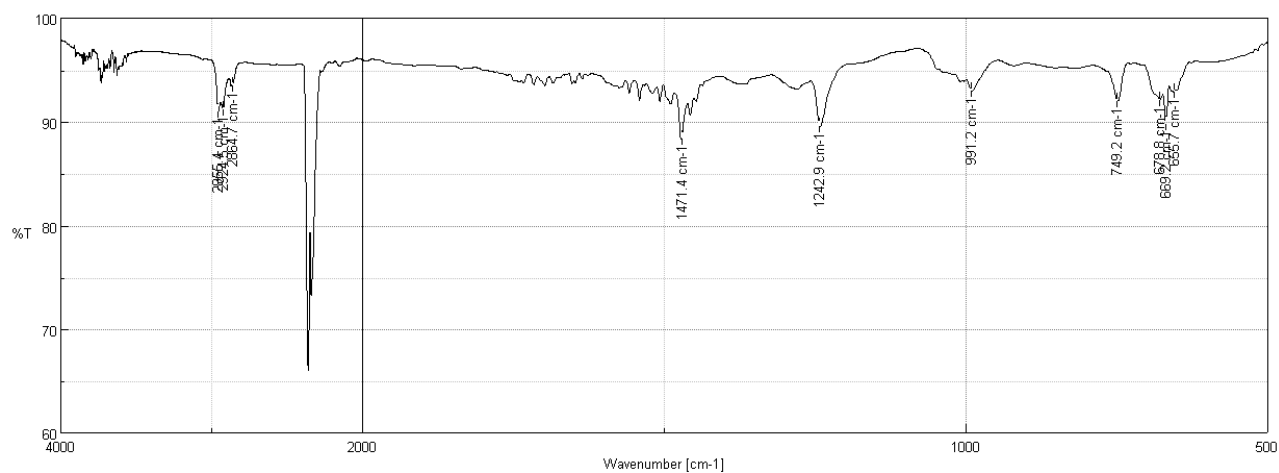

### 5.3.4 1,2-Bis(2-(((1S,2R,5S)-2-isopropyl-5-methylcyclohexyl)oxy)-phenyl)diselane (11b)

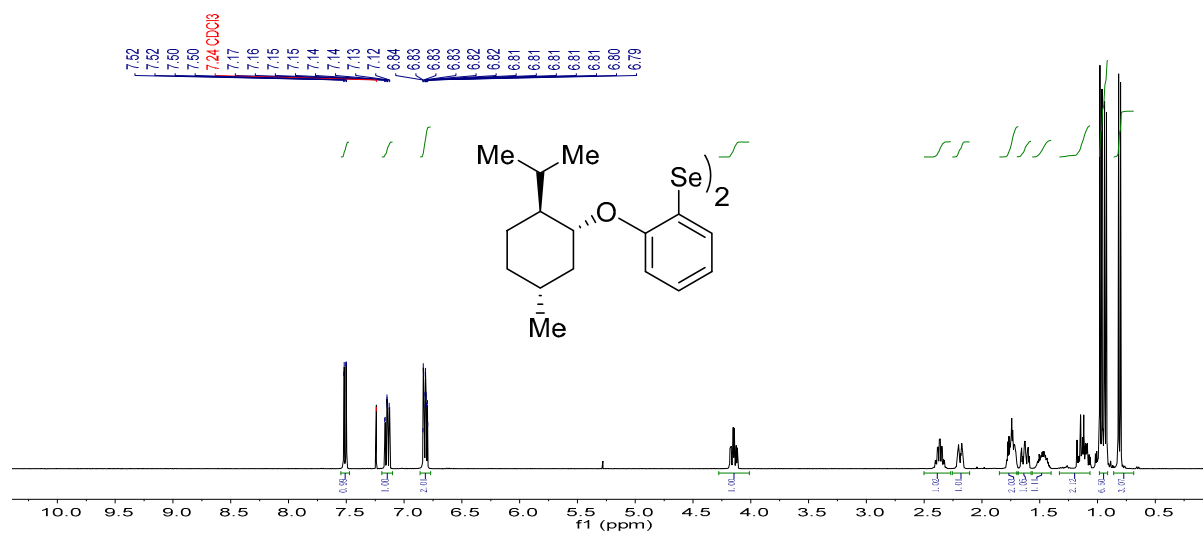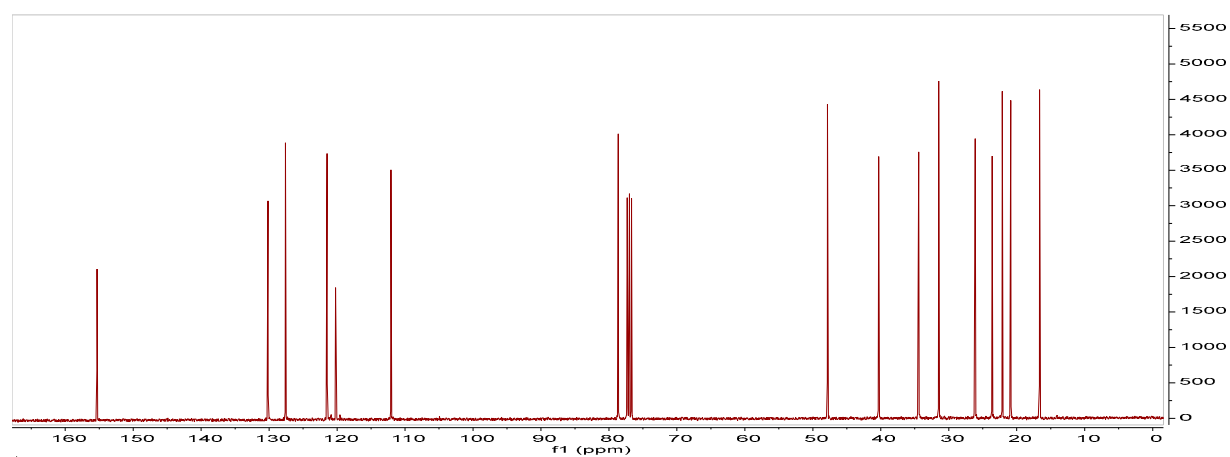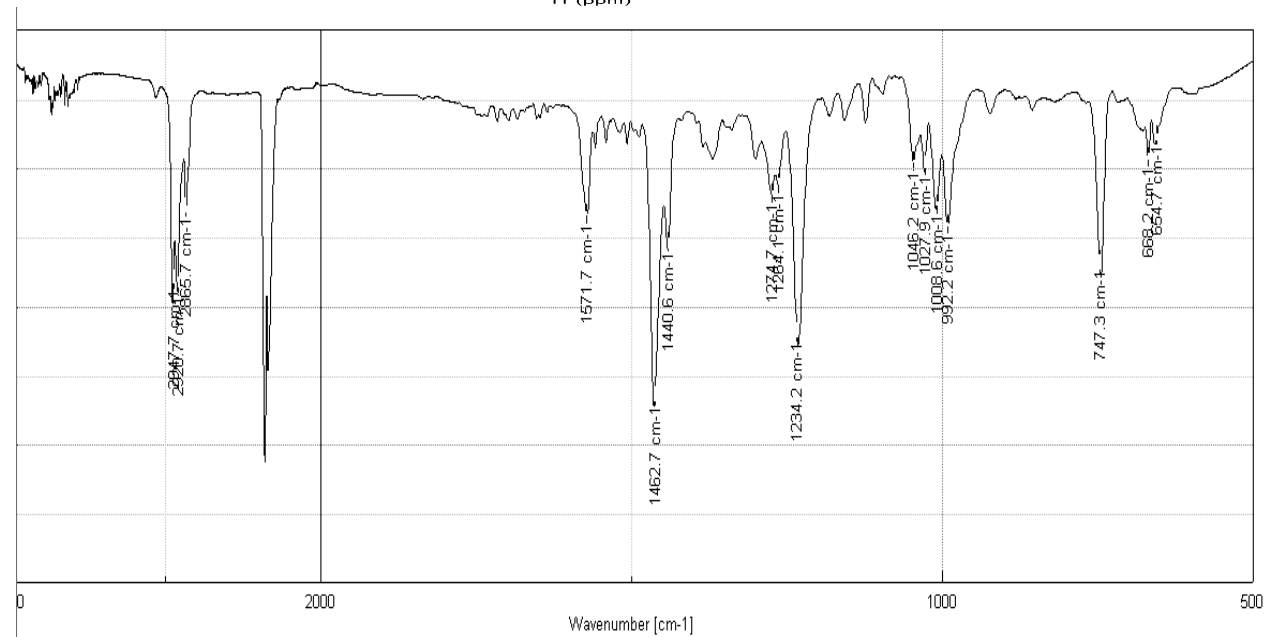

### 5.3.5 1-(((1S,2R,5S)-5-Methyl-2-(2-phenylpropan-2-yl)cyclohexyl)oxy)-2-nitrobenzol

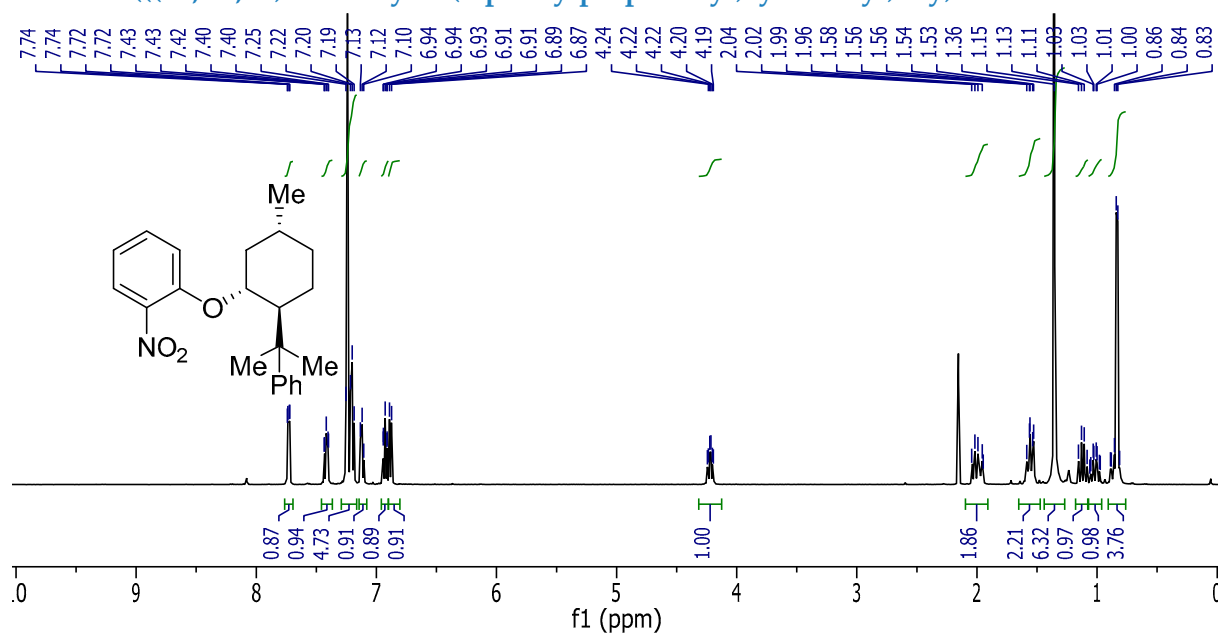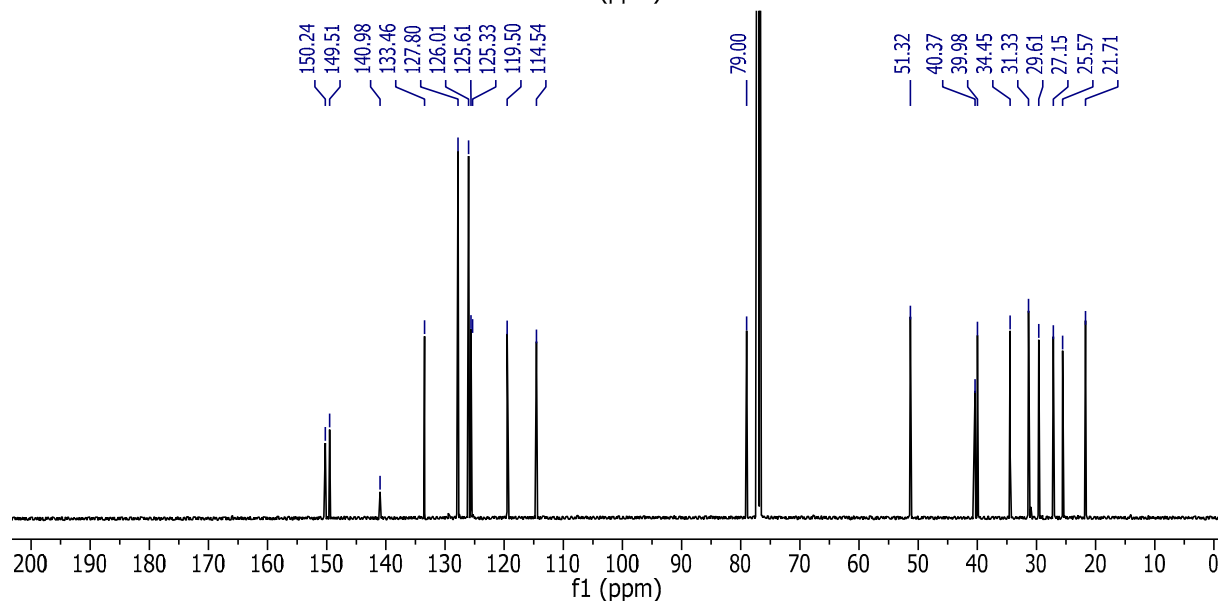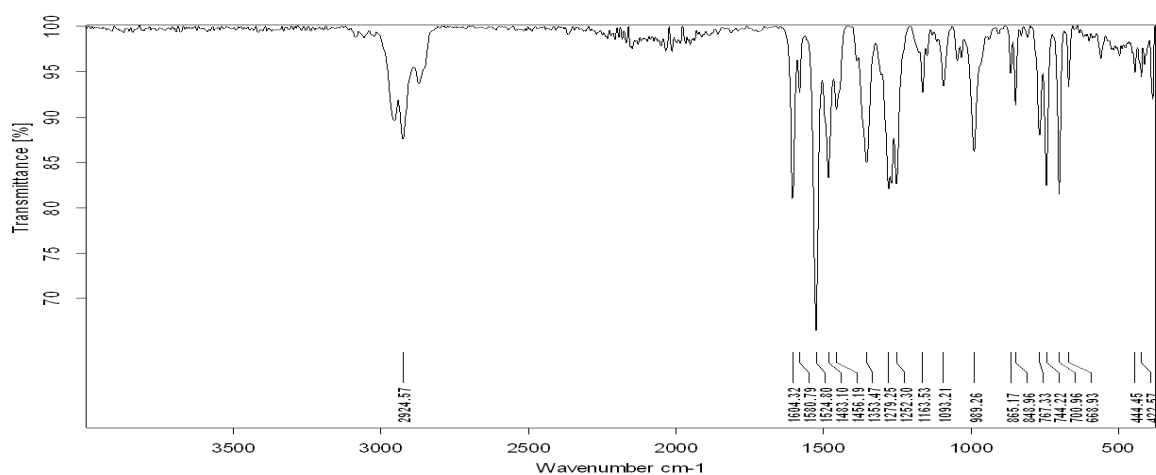

D:\Data\fkraetzsc\FK215-01\_0

FK215-01

12/02/2016

### 5.3.6 2-(((1S,2R,5S)-5-Methyl-2-(2-phenylpropan-2-yl)cyclohexyl)oxy)aniline (9c)

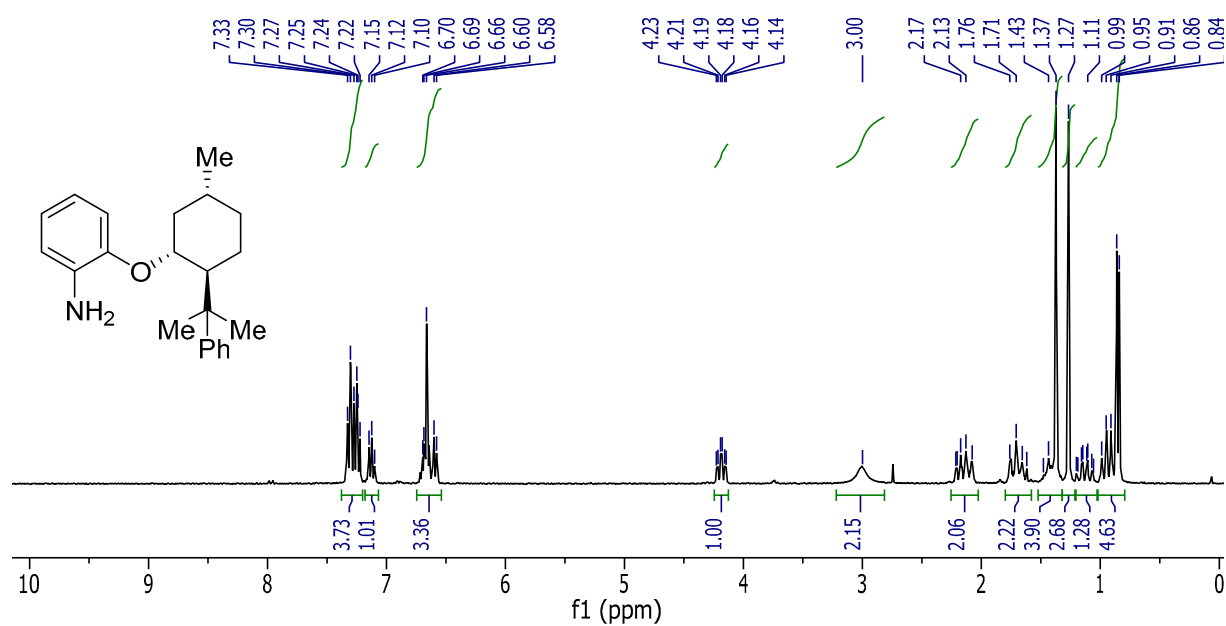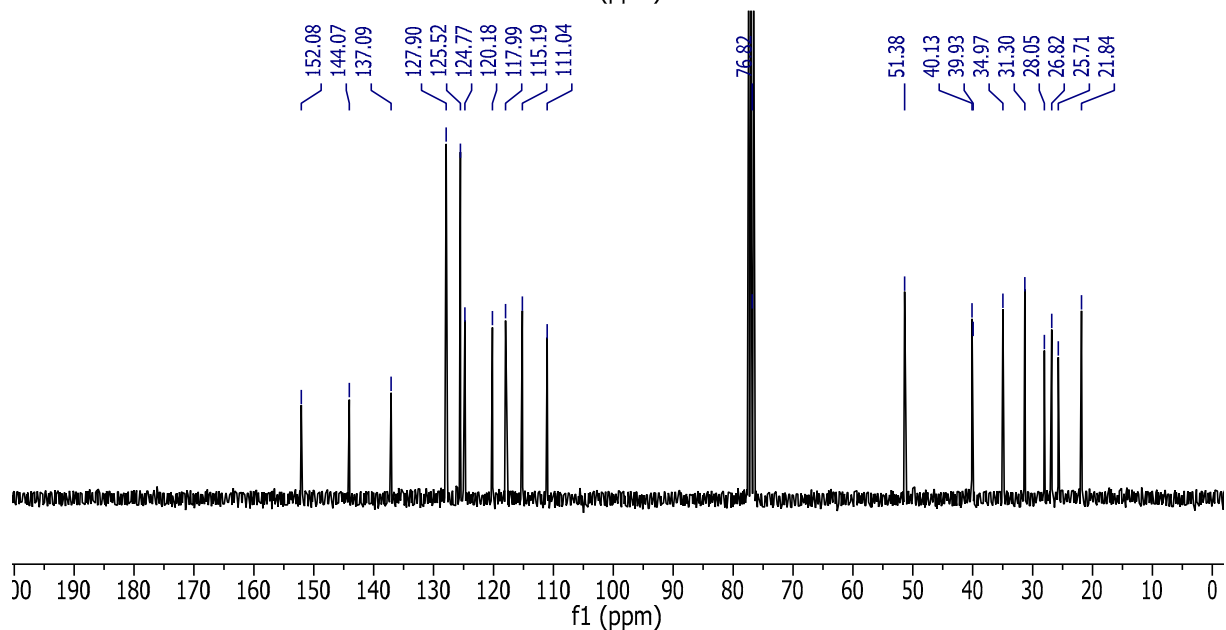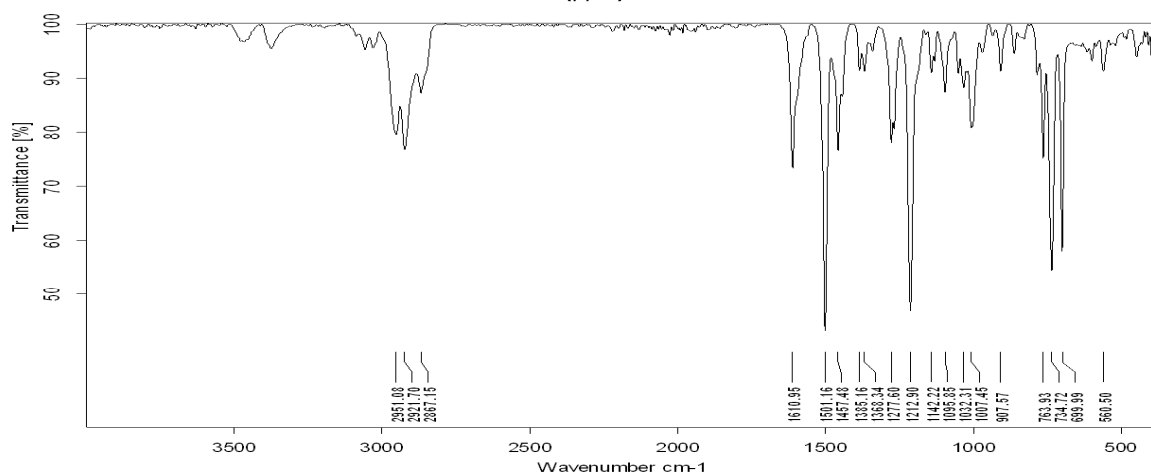

5.3.7 1-(((1*S*,2*R*,5*S*)-5-Methyl-2-(2-phenylpropan-2-yl)cyclohexyl)oxy)-2-selenocyanatobenzene (10c)

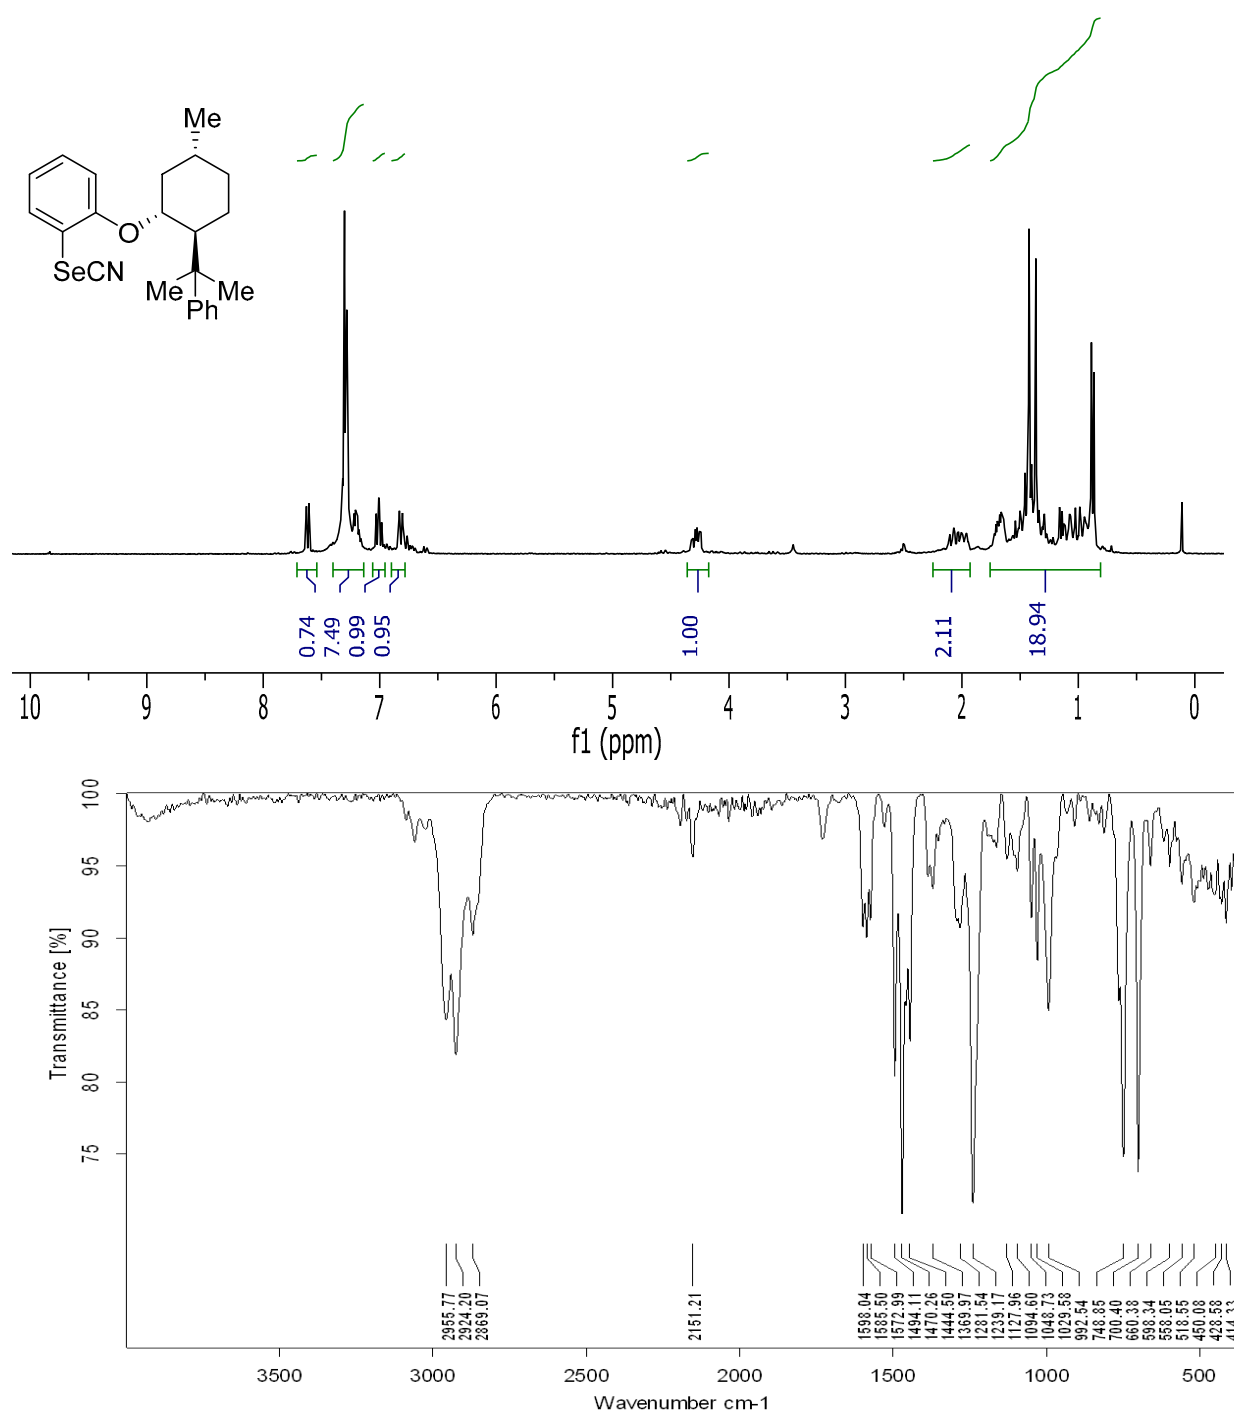

D:\Data\kraetzsc\FK218-01cr\_0

FK218-01cr

19/02/2016

5.3.8 1,2-Bis(2-(((1*S*,2*R*,5*S*)-5-methyl-2-(2-phenylpropan-2-yl)cyclohexyl)oxy)-phenyl)diselane (11c)

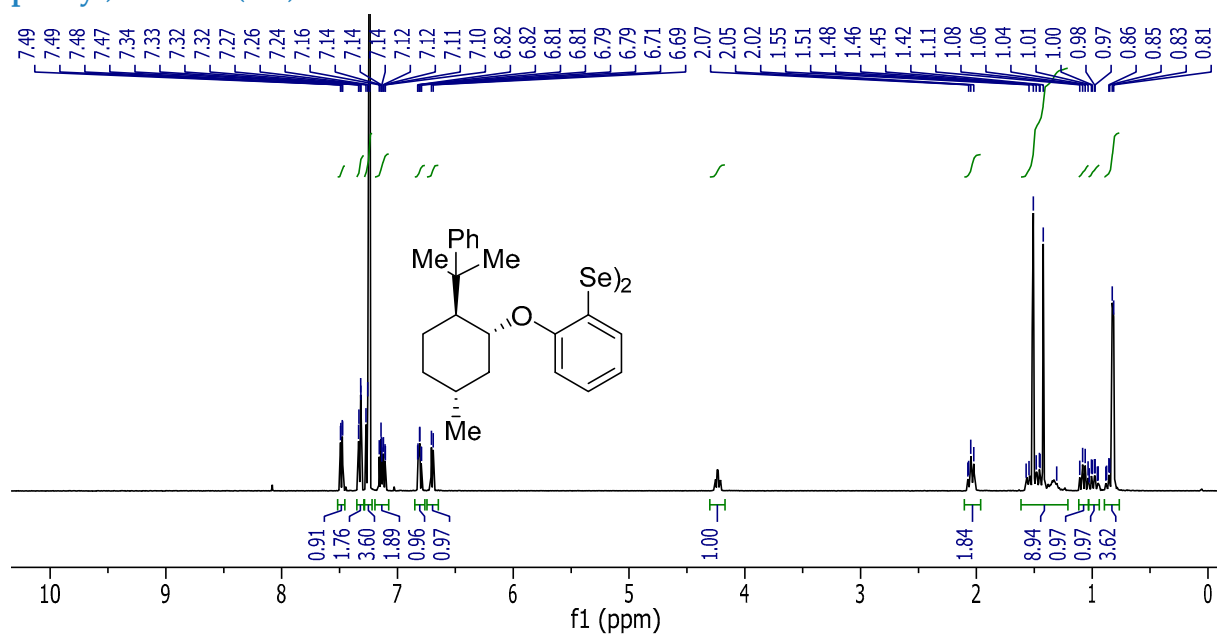

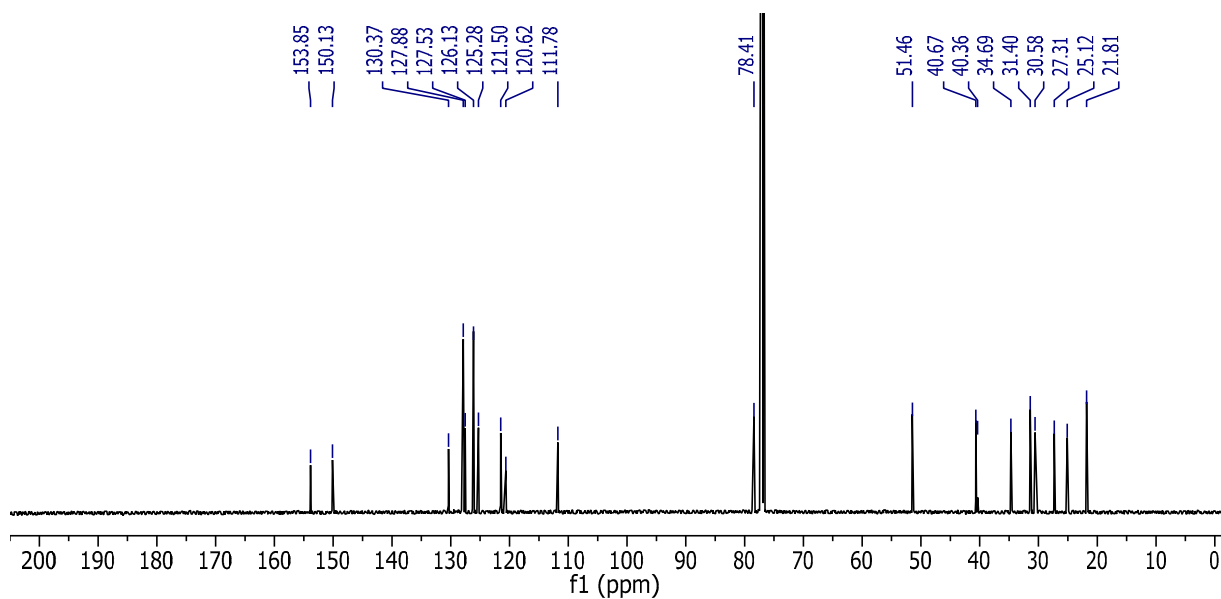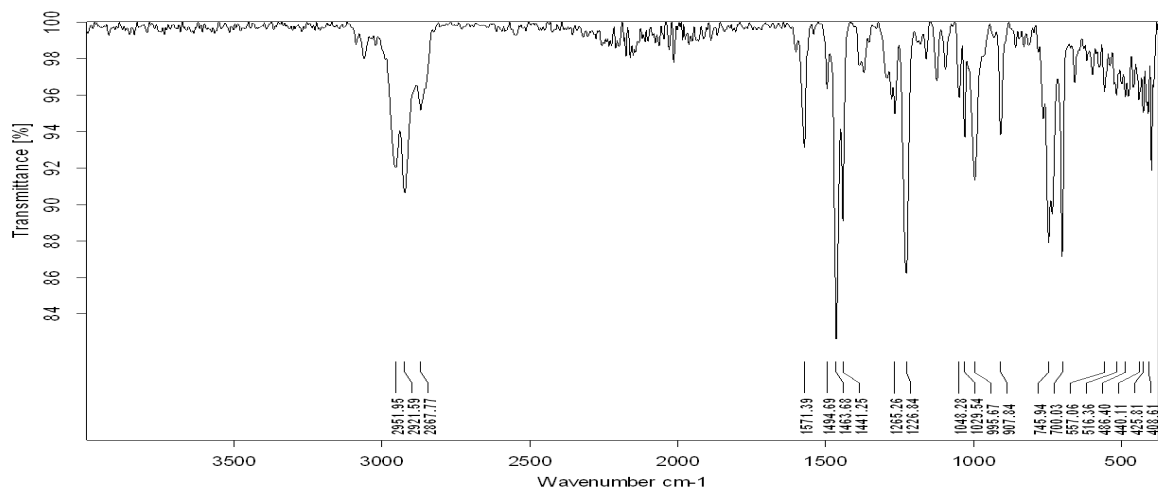

D:\Data\fkraetzsc\FK219-02\_1

FK219-02

04/03/2016

### 5.3.9 (1S,4aR,8R,8aR)-8-phenyldecahydronaphthalen-1-ol

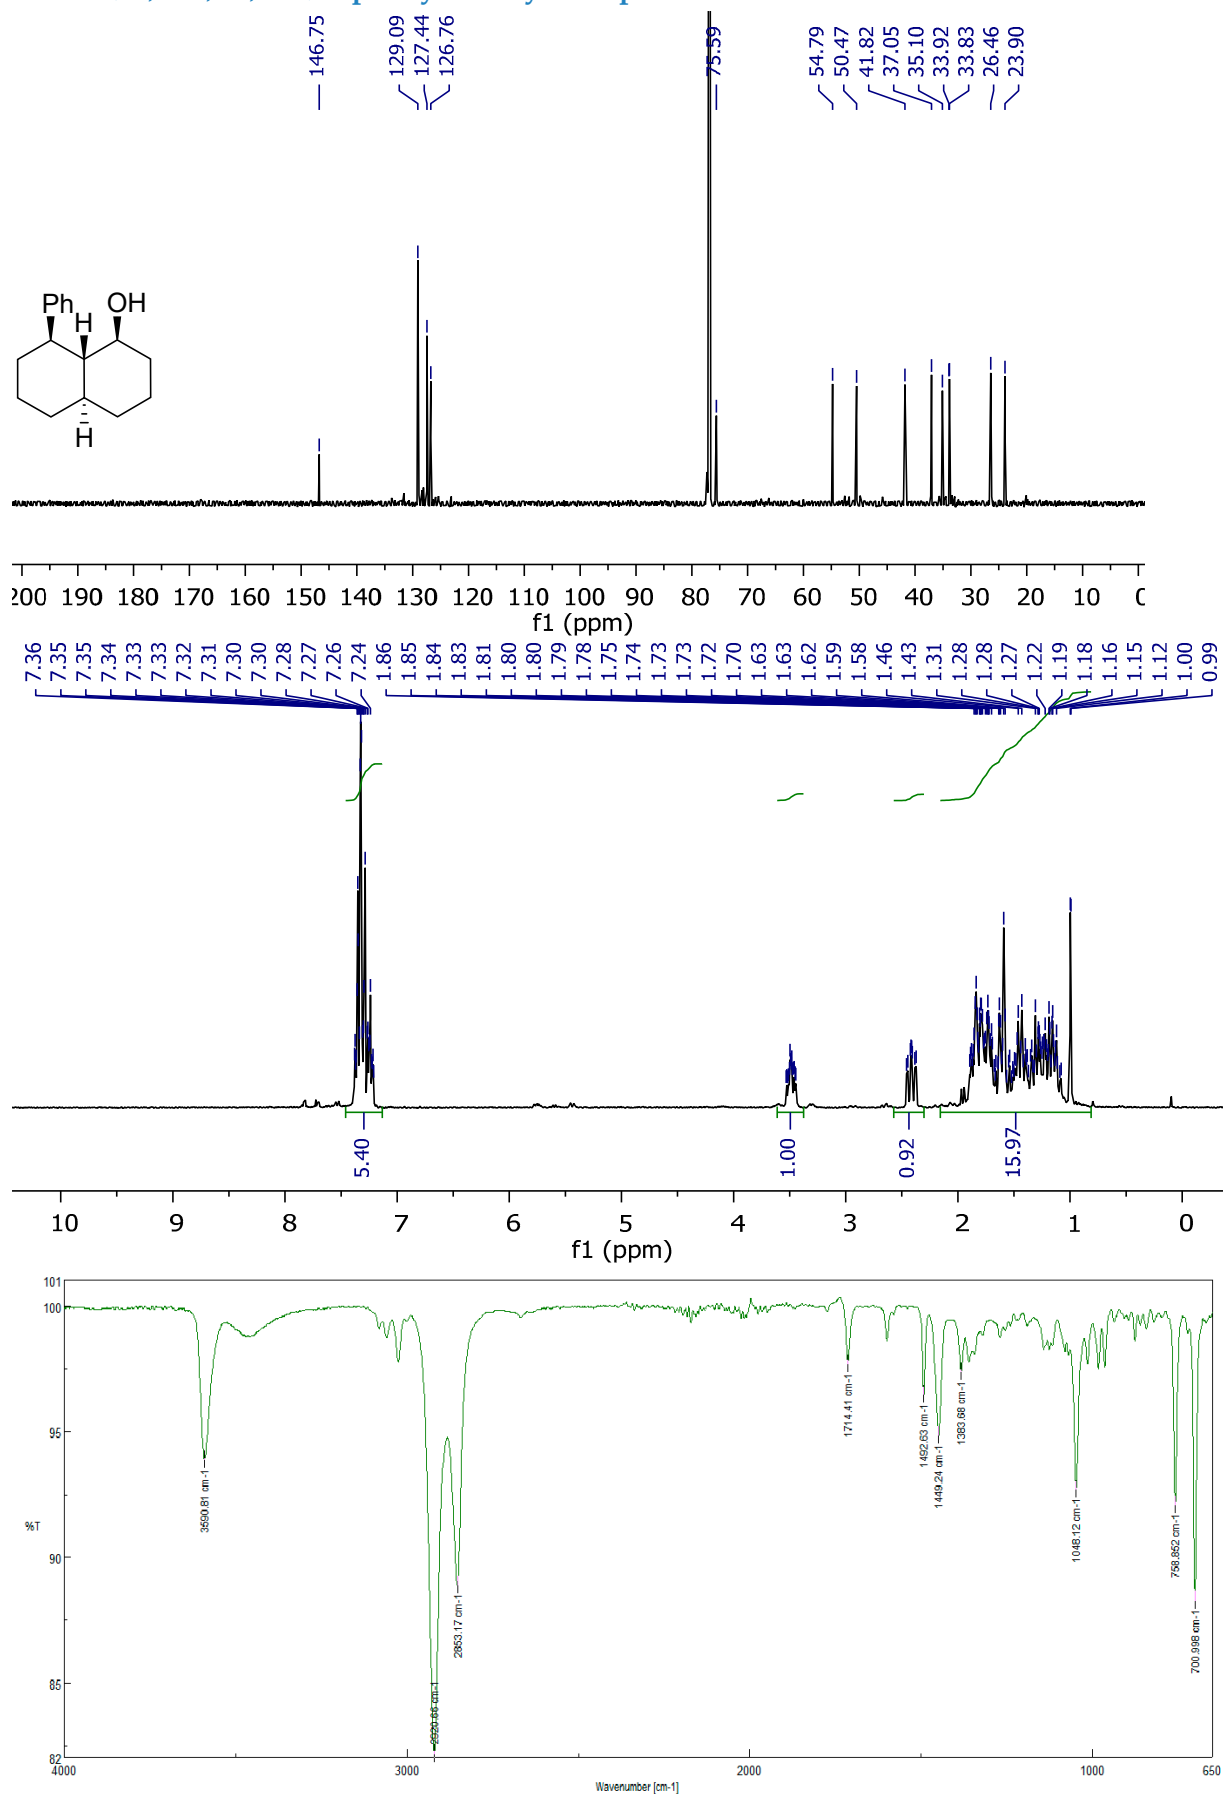

### 5.3.10 (1S,4aR,8R,8aR)-1-(2-bromophenoxy)-8-phenyldecahydronaphthalene (16)

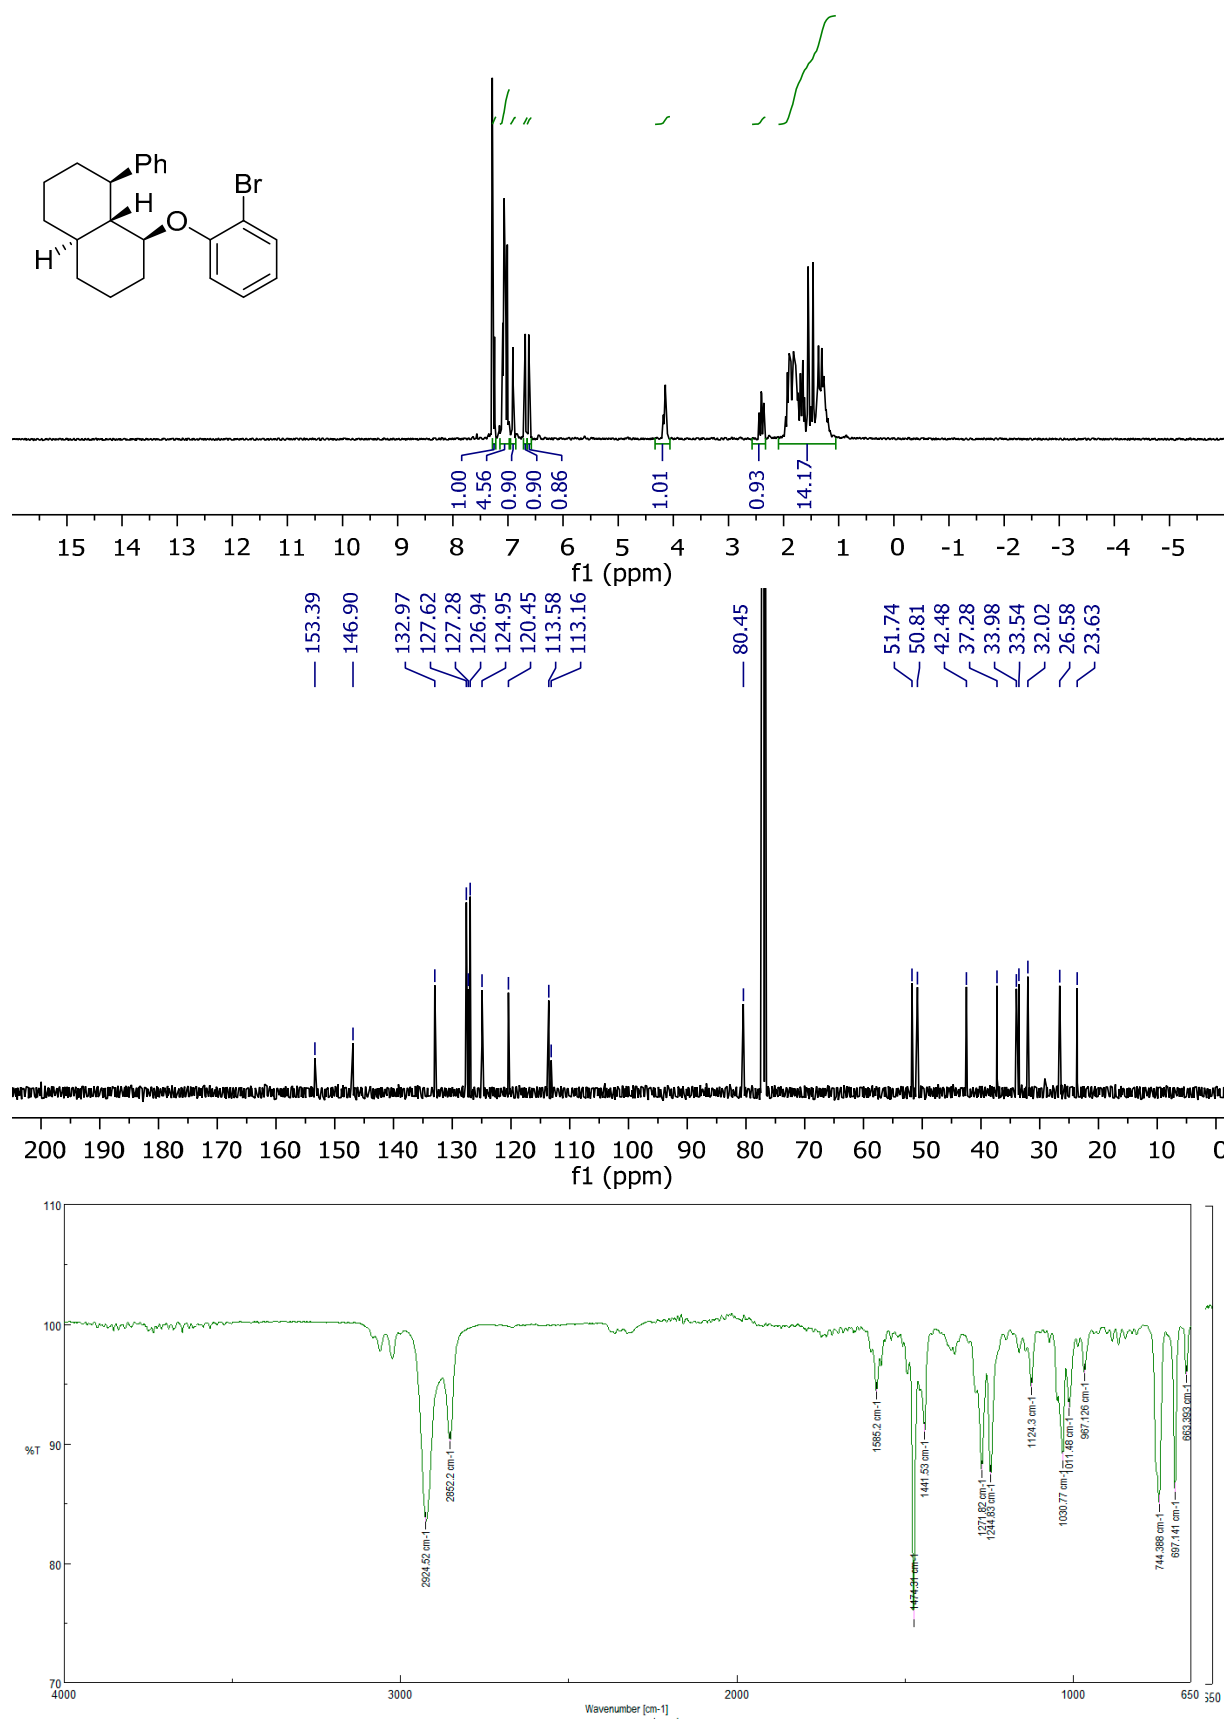

5.3.11 Butyl(2-(((1*S*,4*aR*,8*R*,8*aR*)-8-phenyldecahydronaphthalen-1-yl)oxy)phenyl)selane  
(11d)

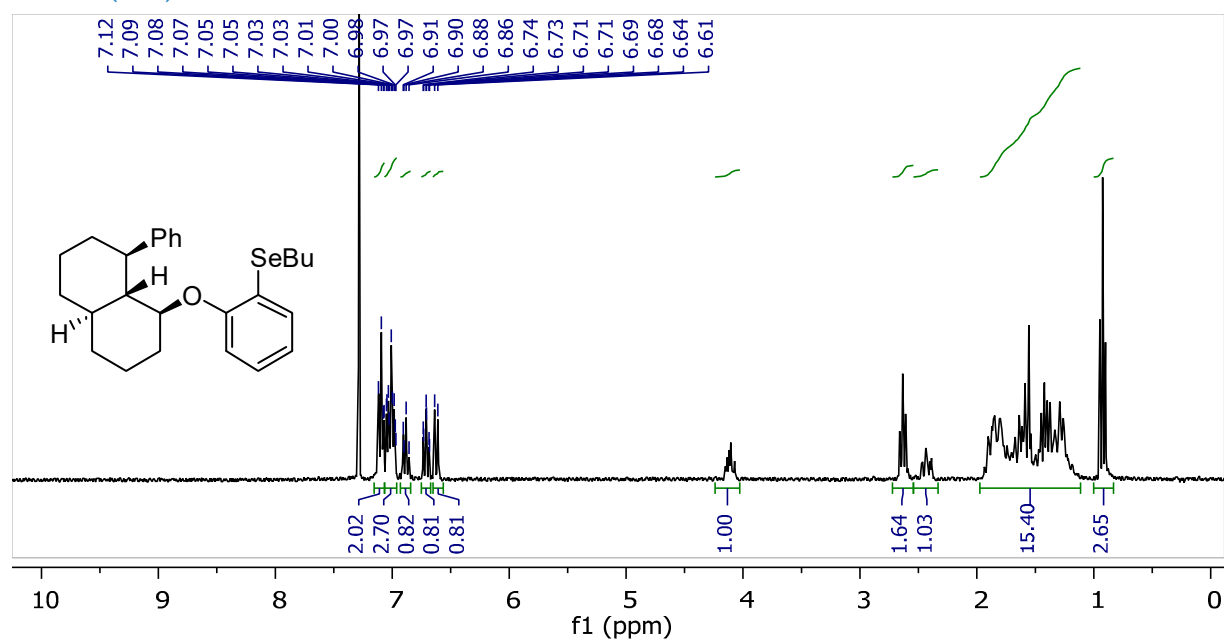

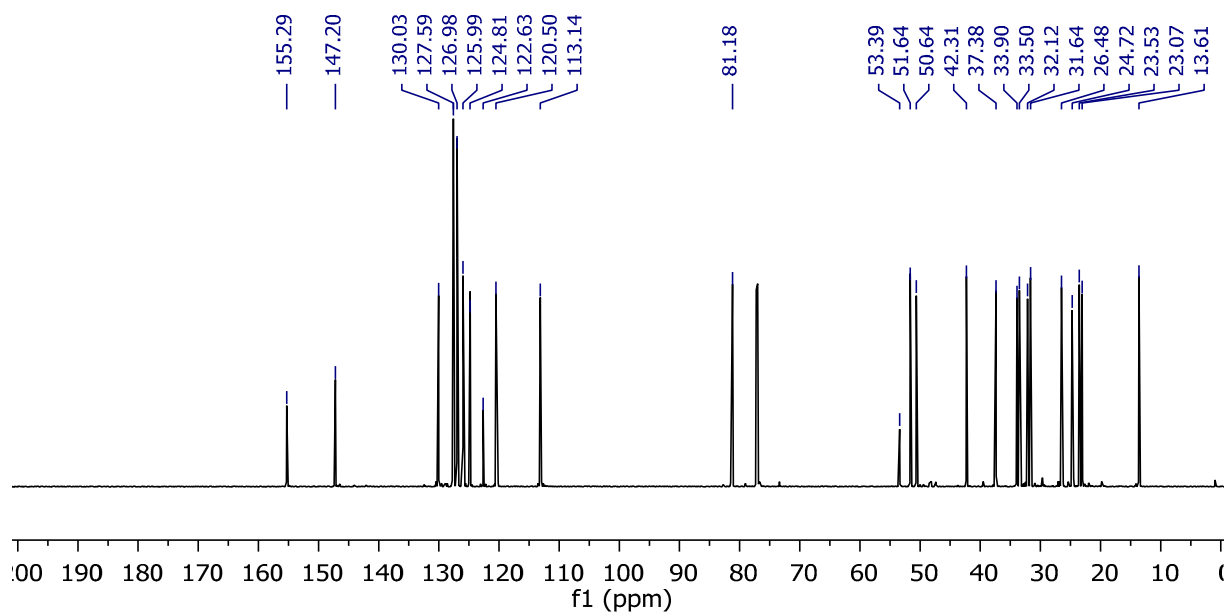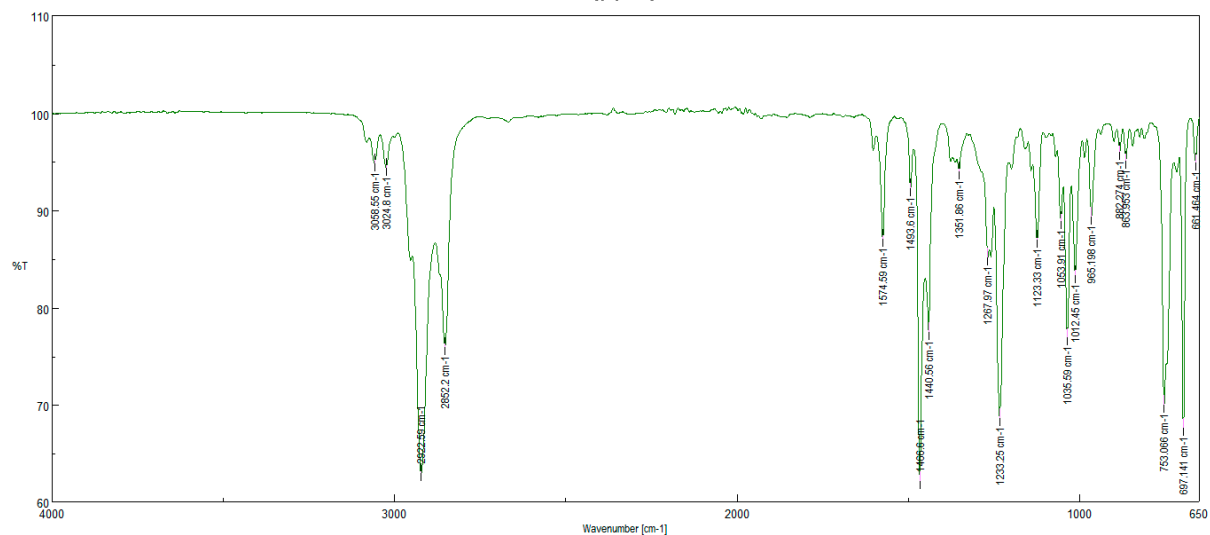

### 5.3.12 (1S)-1,7,7-Trimethyl-2-(2-nitrophenoxy)bicyclo[2.2.1]heptane

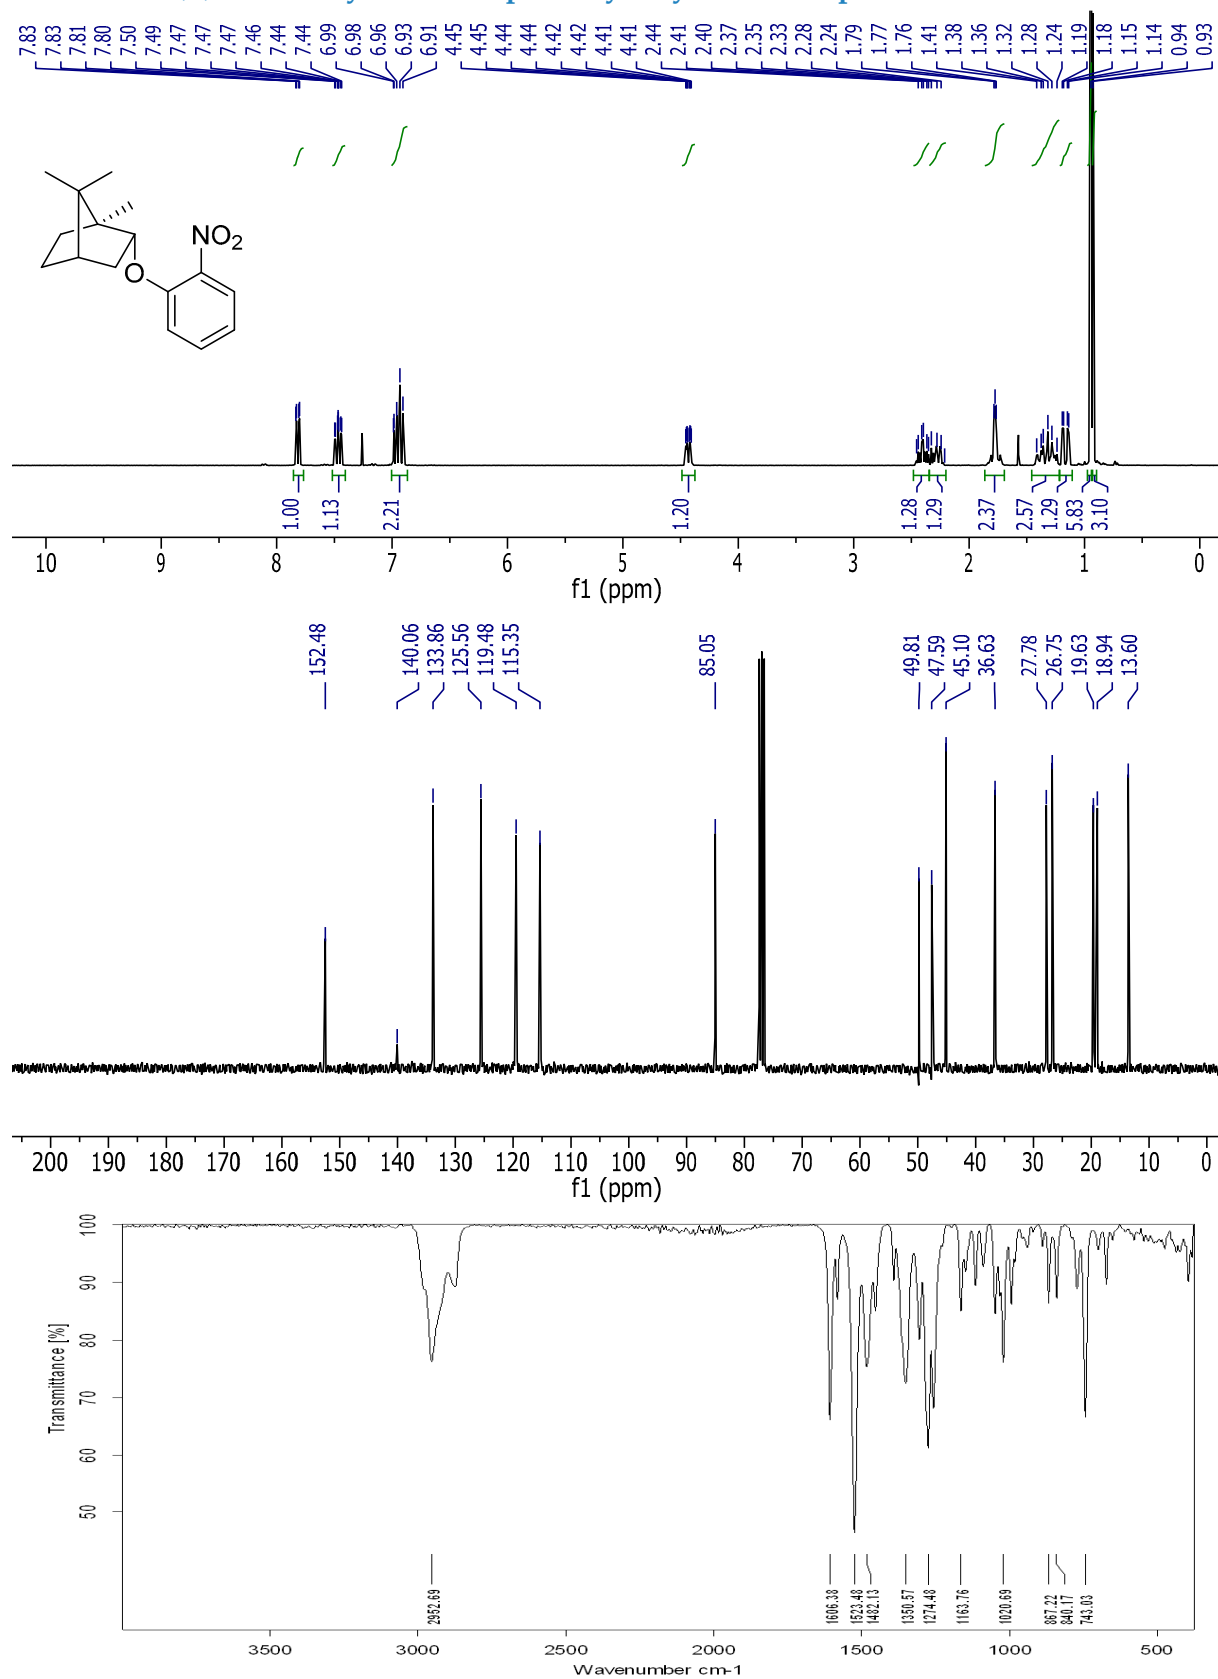

D:\Data\fkraetzsc\FK233-01\_0

FK233-01

20/05/2016

### 5.3.13 2-(((1S,2R,4S)-1,7,7-Trimethylbicyclo[2.2.1]heptan-2-yl)oxy)-aniline (9a)

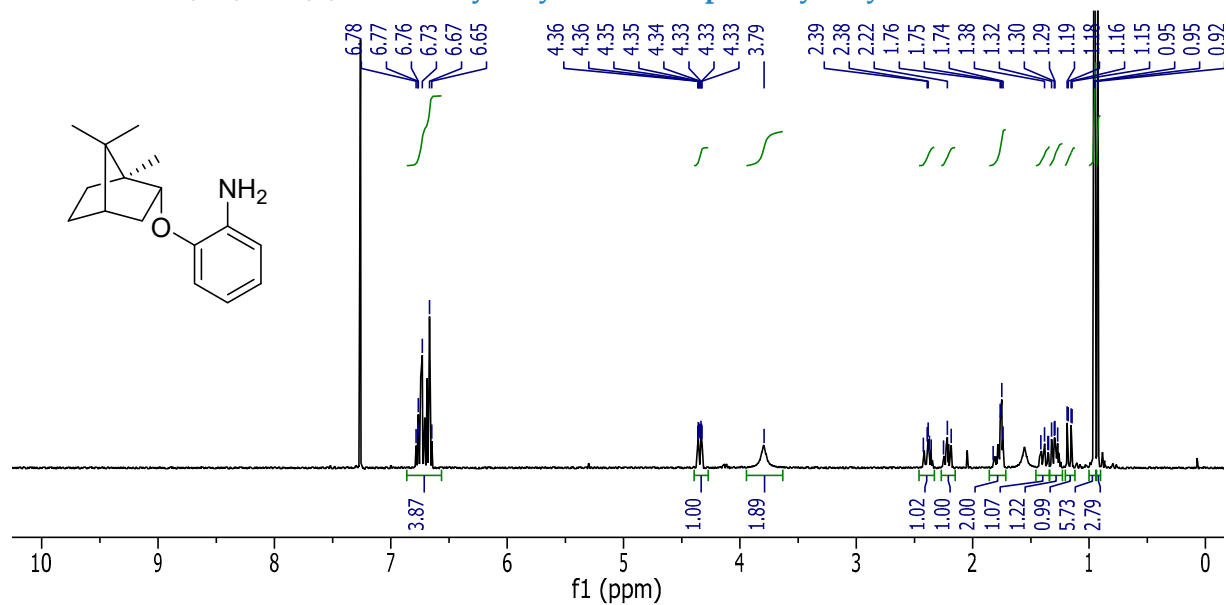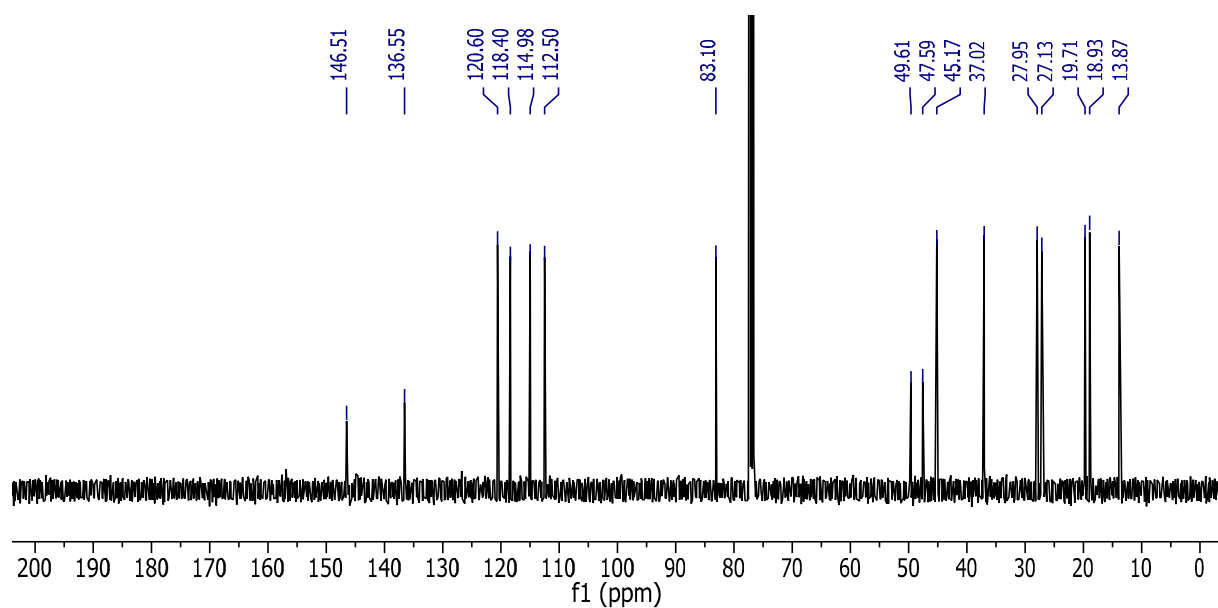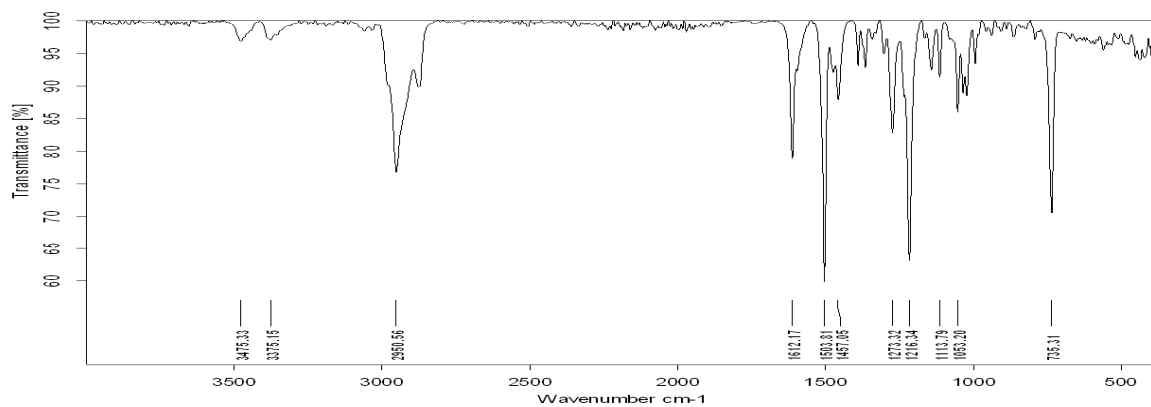

D:\Data\fkraetzsc\FK234-01\_0

FK234-01

20/05/2016

### 5.3.14 (1S)-1,7,7-trimethyl-2-(2-selenocyanatophenoxy)bicyclo[2.2.1]-heptane (10a)

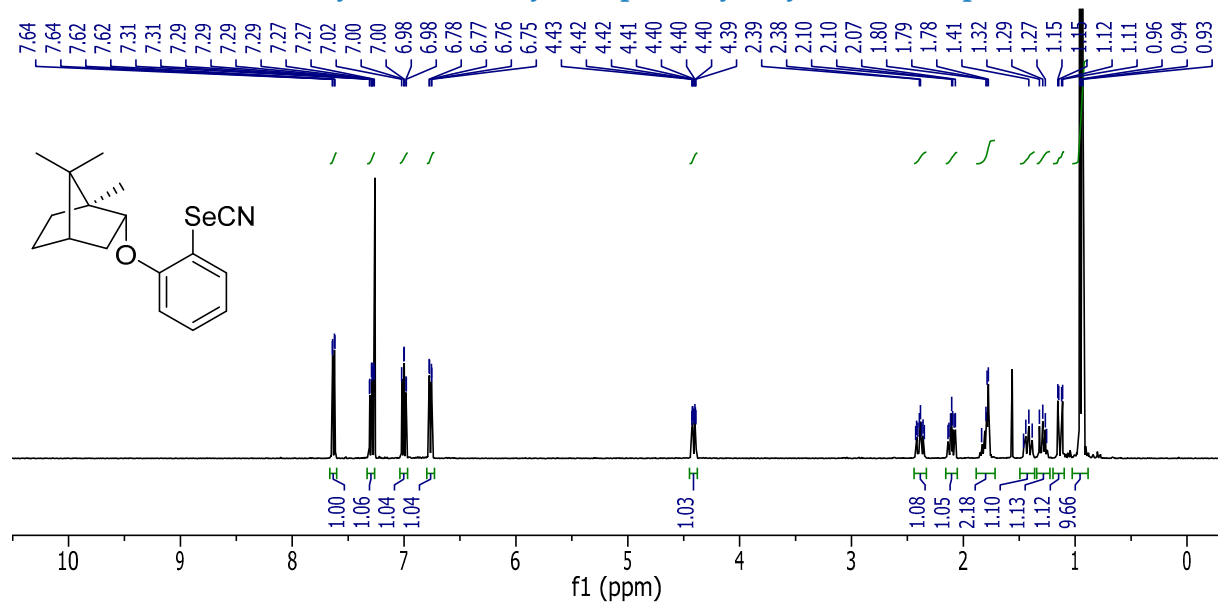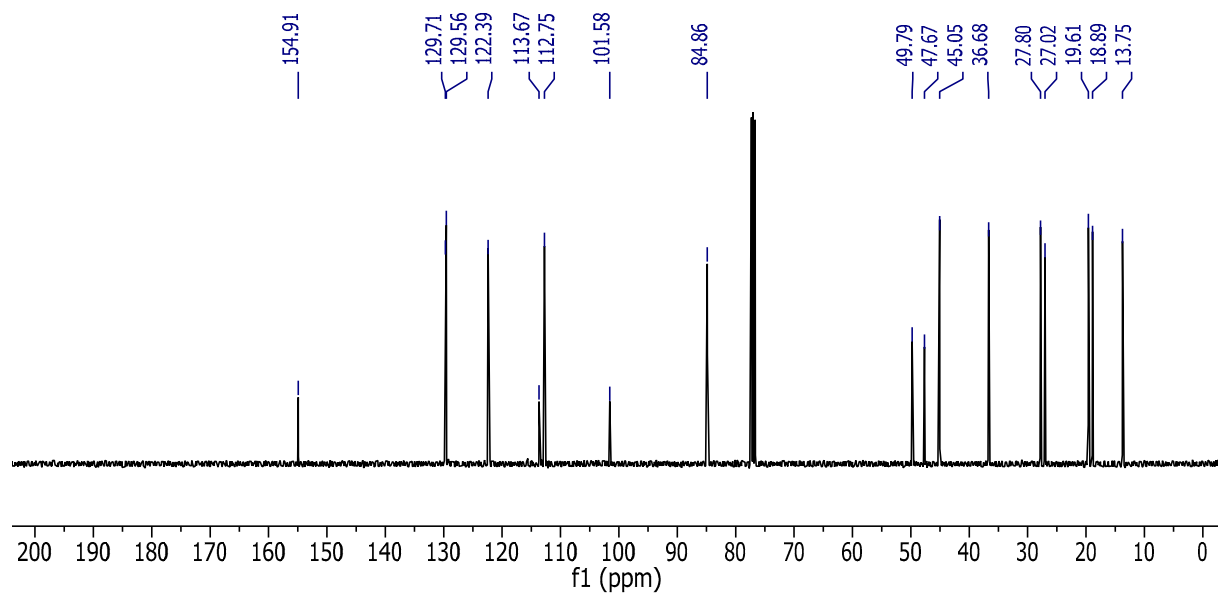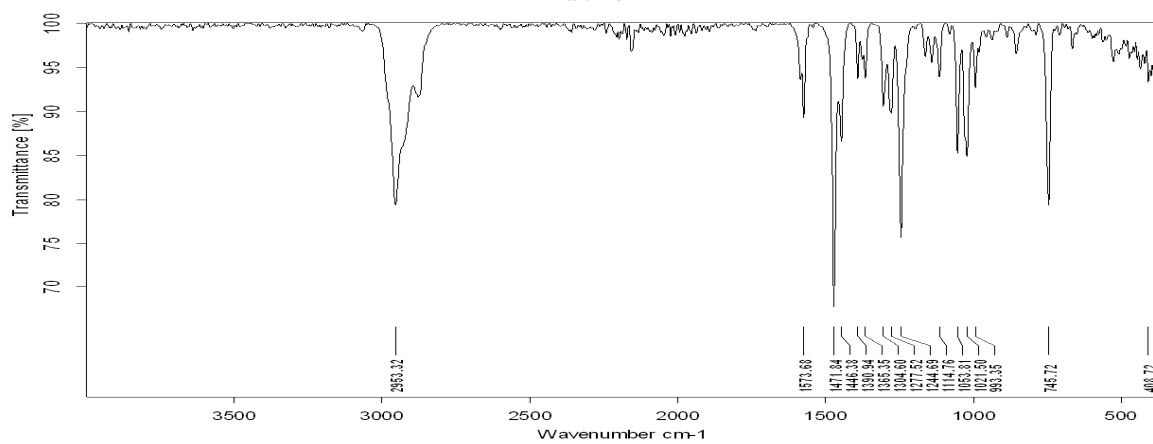

5.3.15 1,2-Bis(2-(((1S,2R,4S)-1,7,7-trimethylbicyclo[2.2.1]heptan-2-yl)oxy)phenyl)  
diselenide (11a)

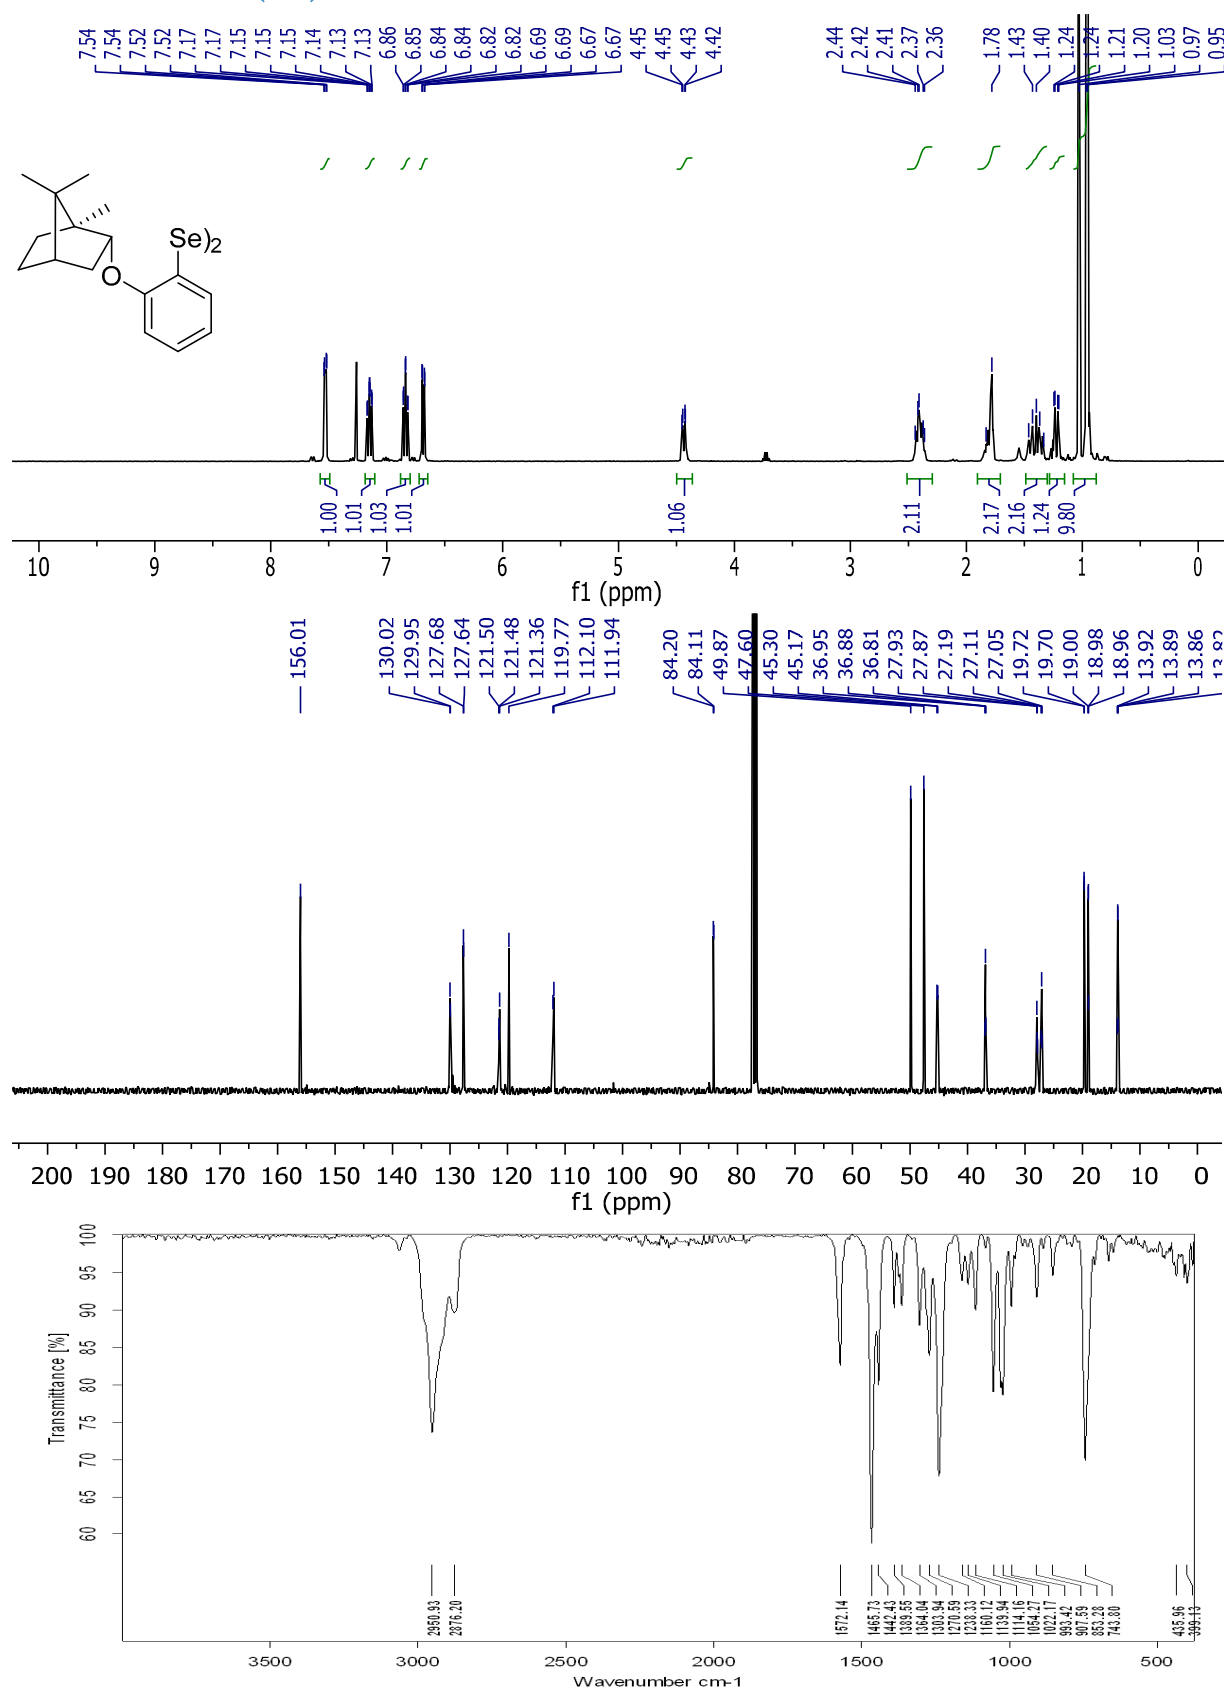

D:\Data\fkraetzsc\FK236-01\_0

FK236-01

20/09/2016

### 5.3.16 (R)-4-Chlorodinaphtho[2,1-d:1',2'-f][1,3,2]dioxaphosphepine 4-oxide (18)

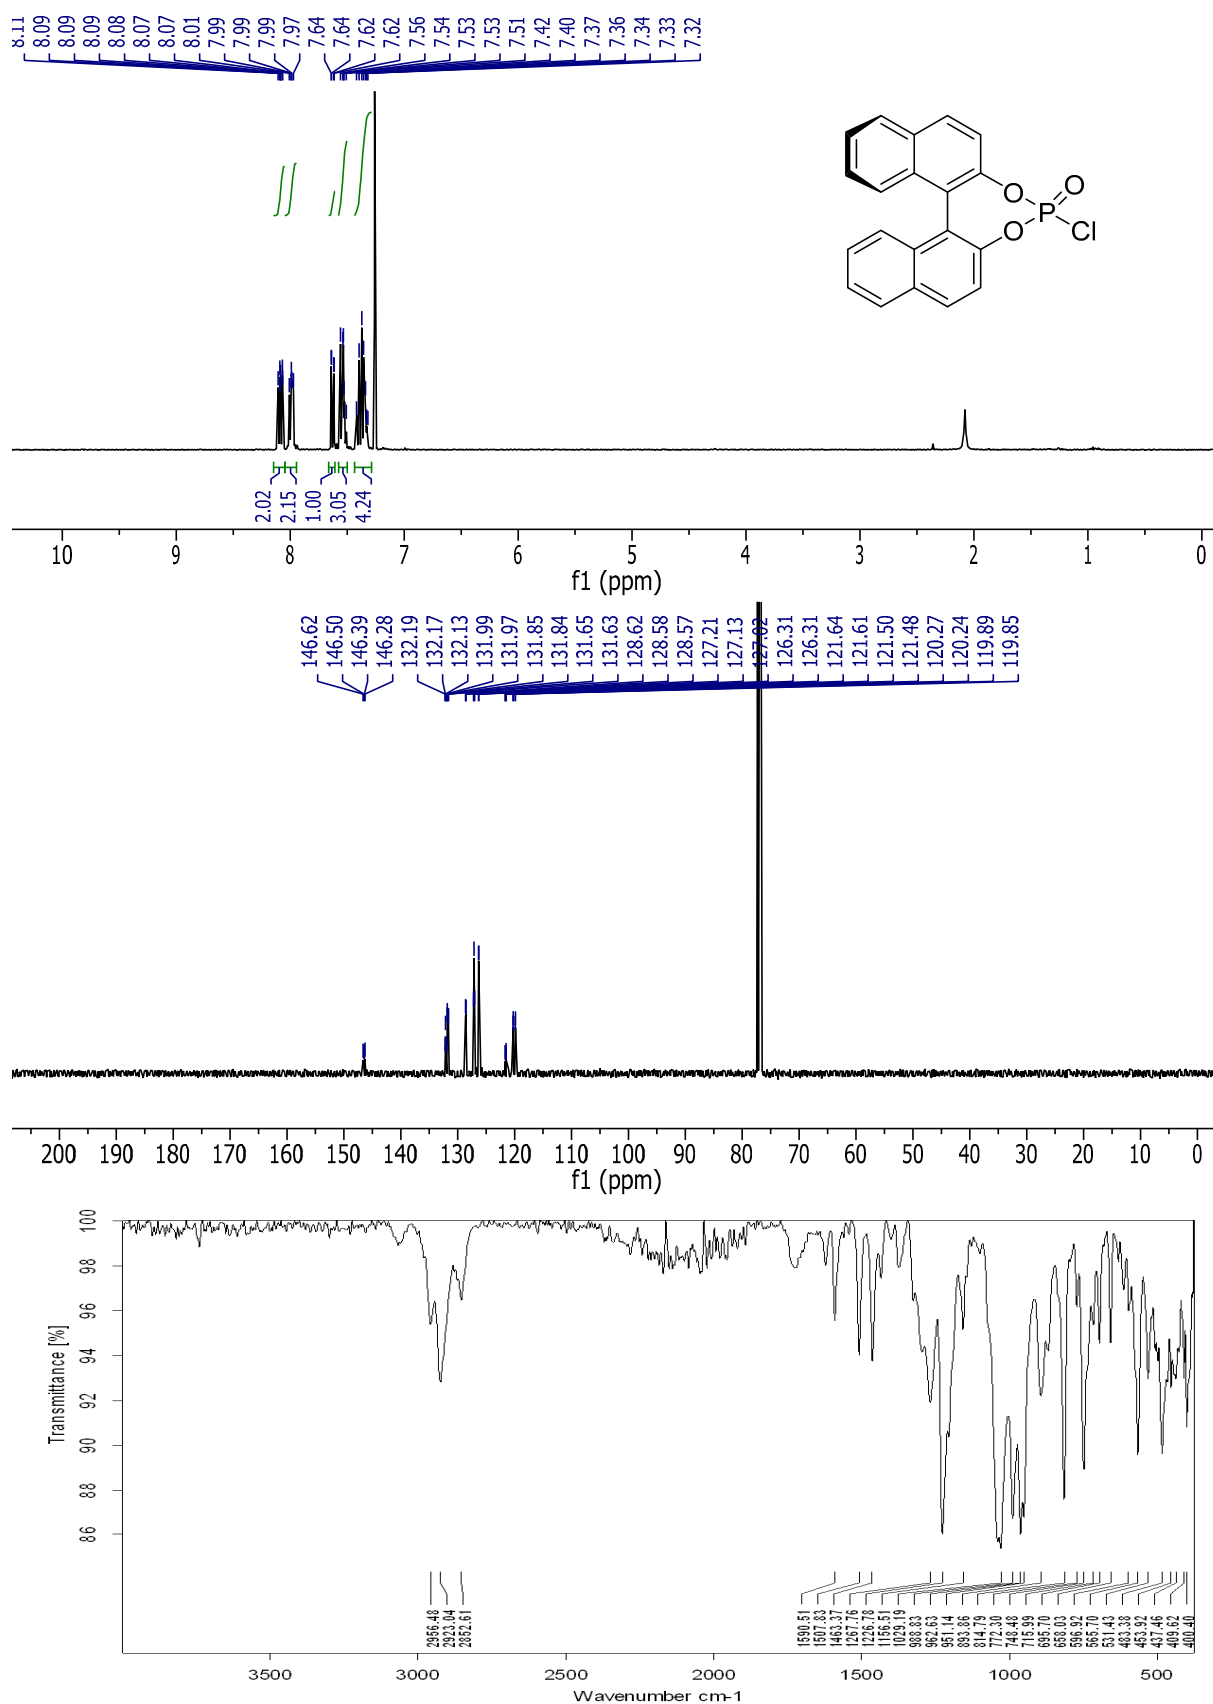

D:\Data\fkraetzsc\FK246-01\_0

FK246-01

20/09/2016

### 5.3.17 2,2'-Diphenol diselenide (19)

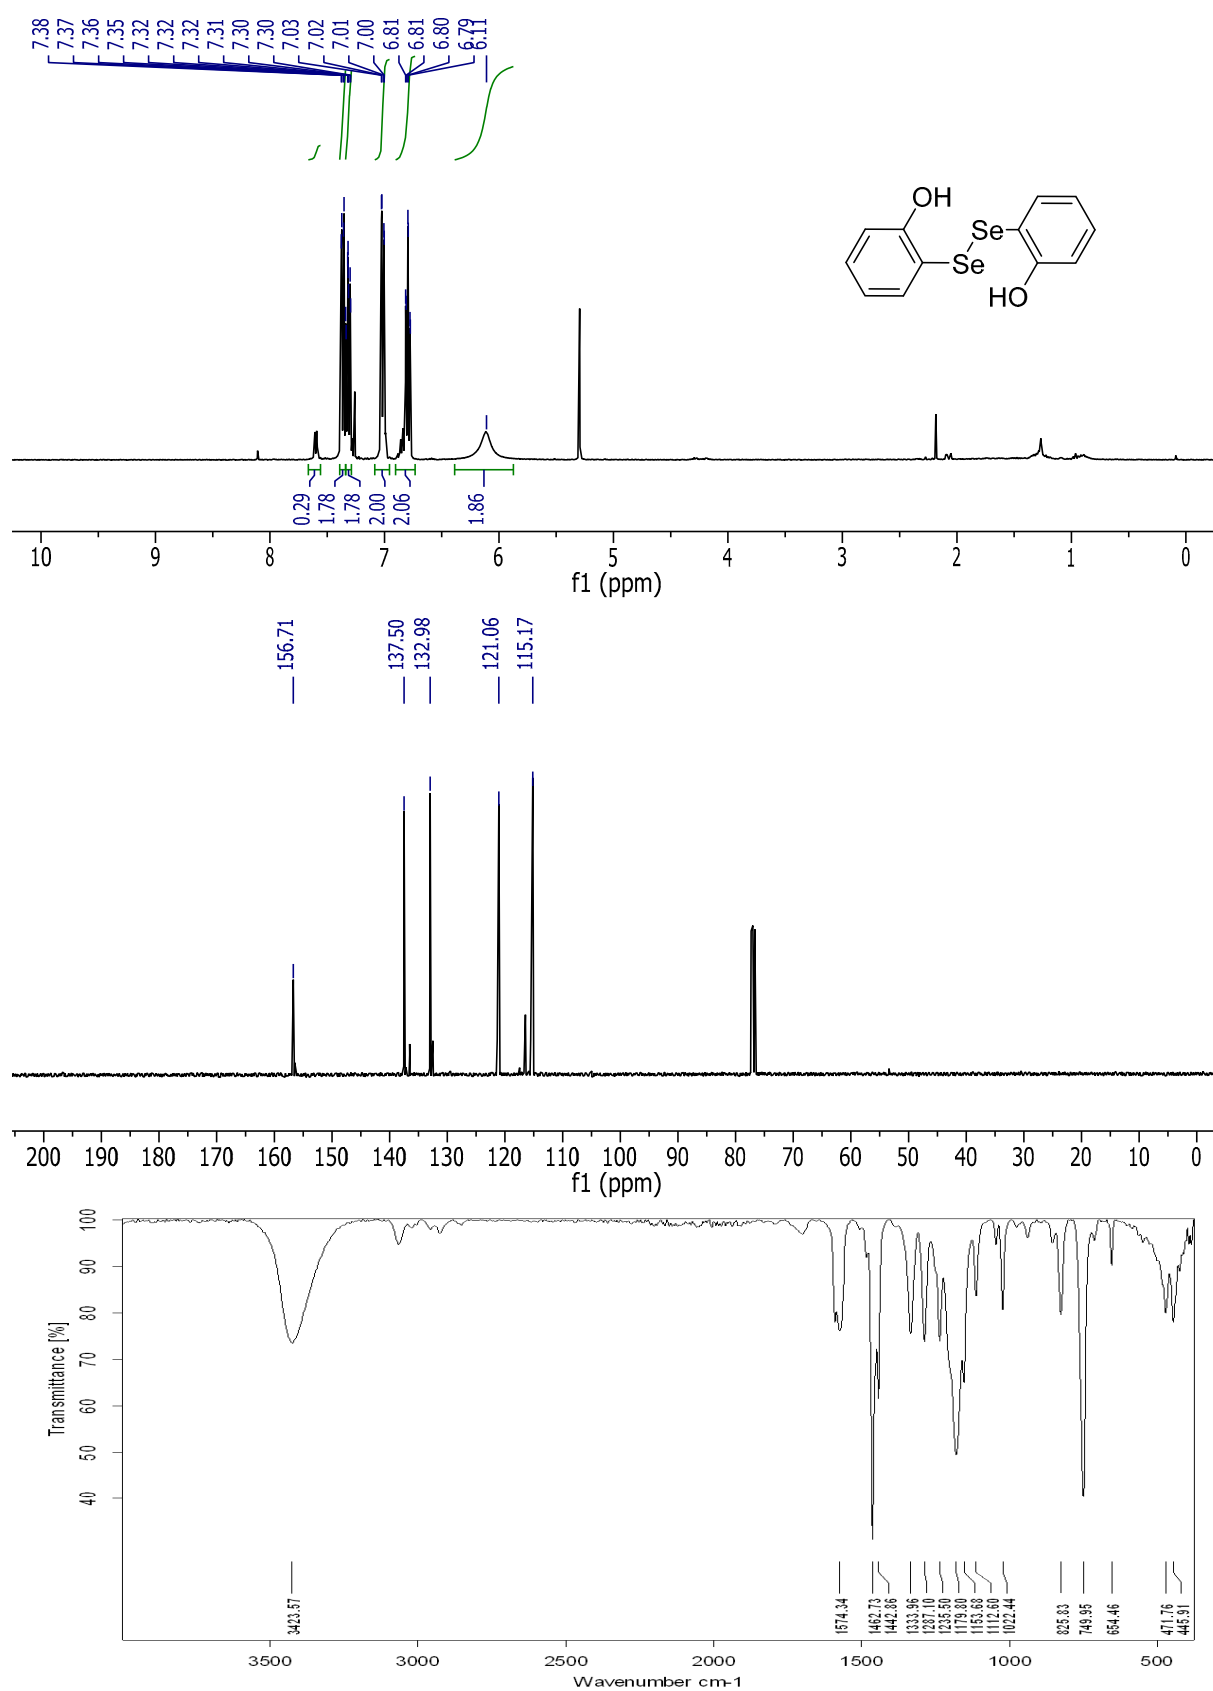

5.3.18 (R)-4,4'-((Diselenidylbis(2,1-phenylene))bis(oxy))bis-(dinaphtho-[2,1-d:1',2'-f][1,3,2]dioxaphosphepine 4-oxid) (20)

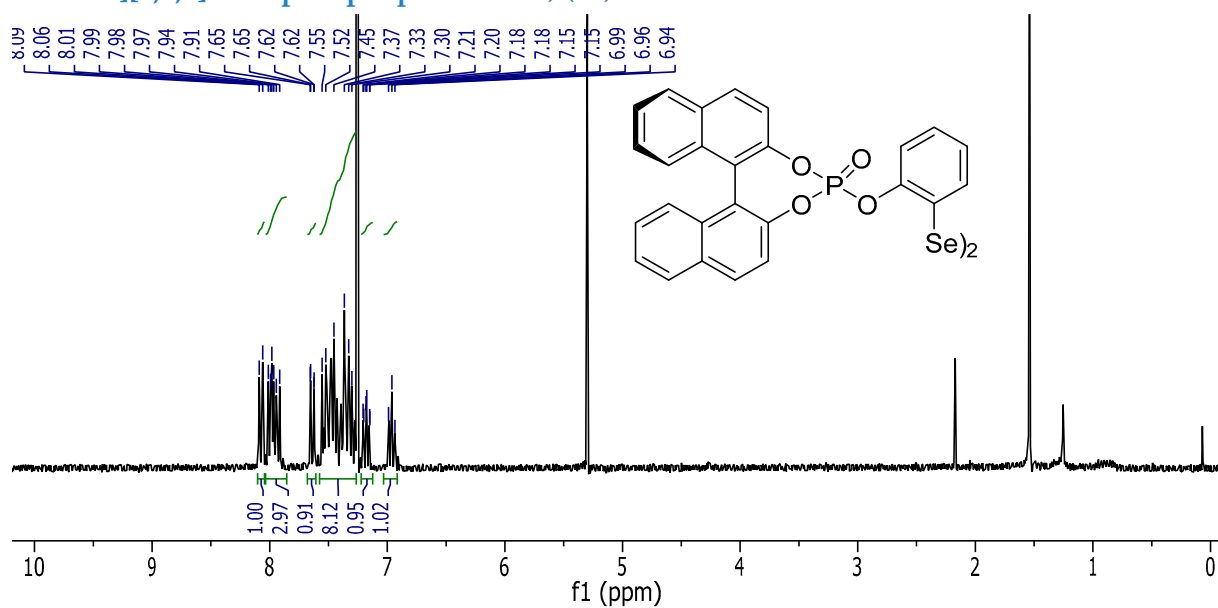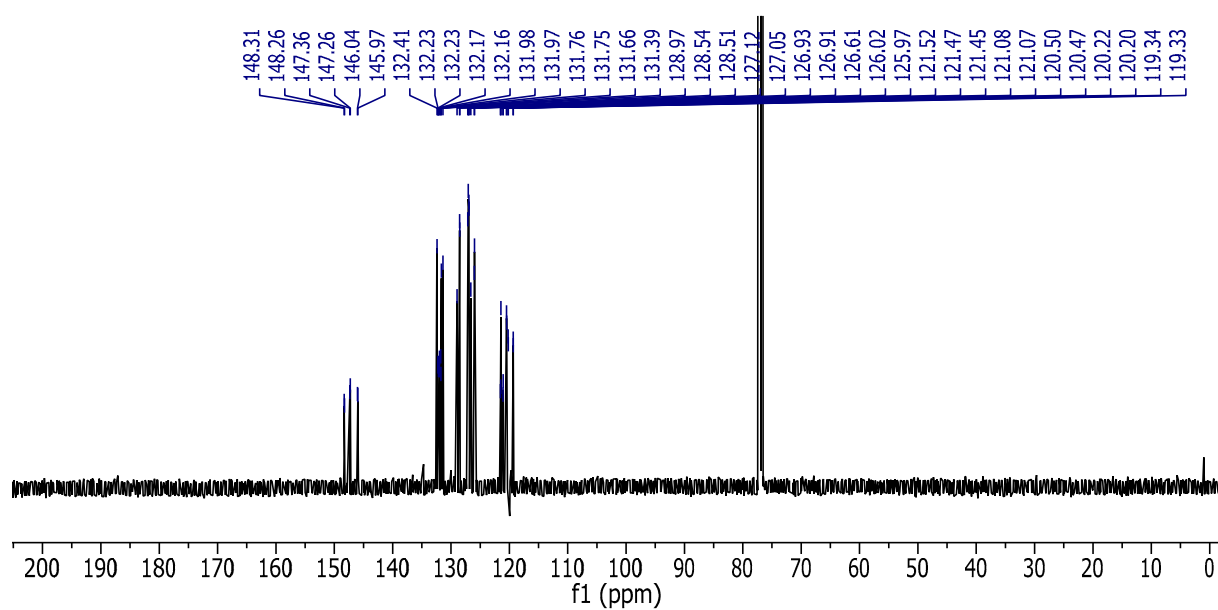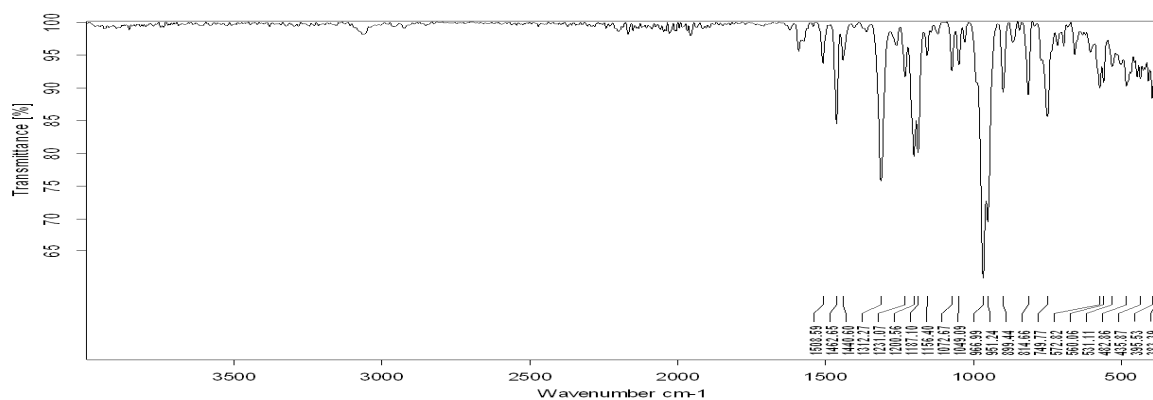

D:\Data\fkraetzsc\FK250-01\_0

FK250-01

20/09/2016

5.3.19 (1S,1'S,2R,2'R,4R,4'R)-2,2'-((2-bromo-1,3-phenylene)bis(oxy))bis(1-isopropyl-4-methylcyclohexane) (13a)

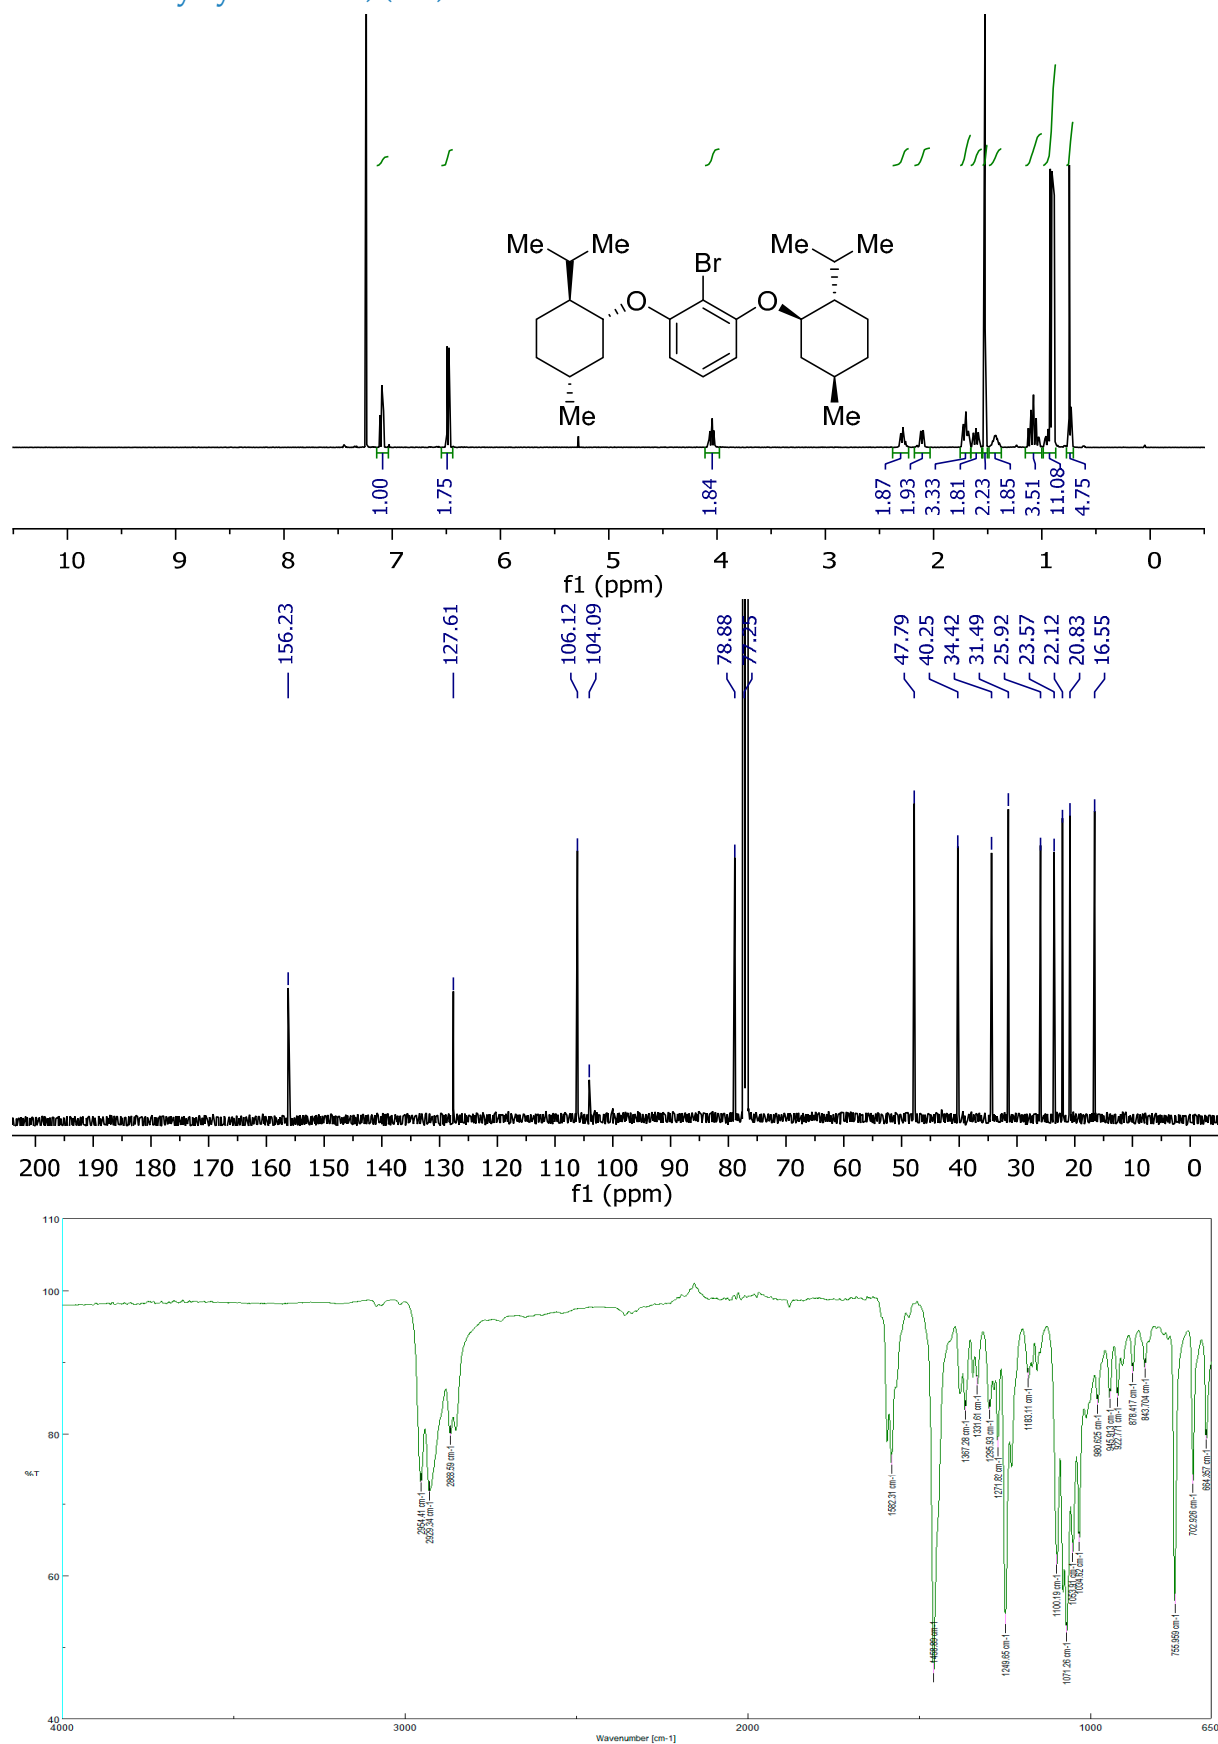

5.3.20 Bis-2,6-bis(((1R,2S,5R)-2-isopropyl-5-methylcyclohexyl)oxy)benzene diselenide  
(14a)

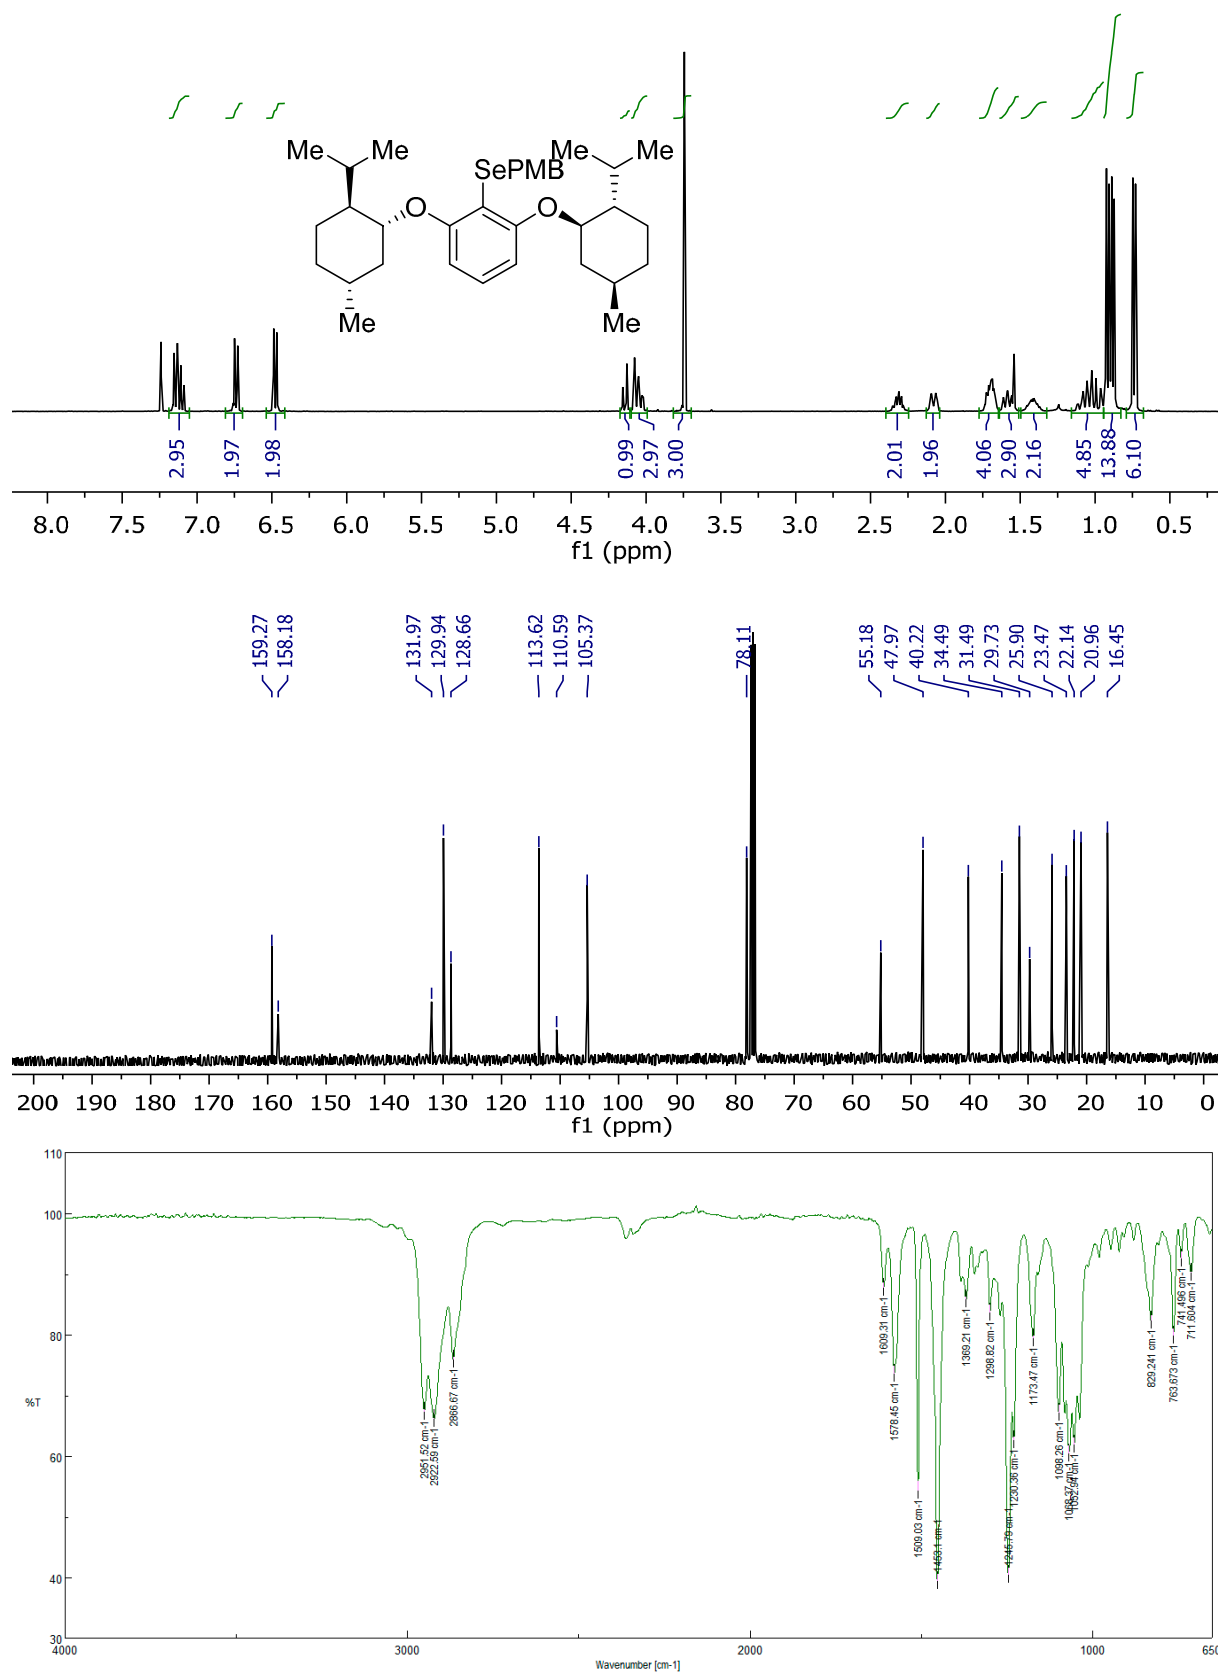

5.3.21 (((1*S*,1'*S*,2*R*,2'*R*,4*R*,4'*R*)-((2-bromo-1,3-phenylene)bis(oxy))bis(4-methylcyclohexane-2,1-diyl))bis(propane-2,2-diyl)dibenzene (13b)

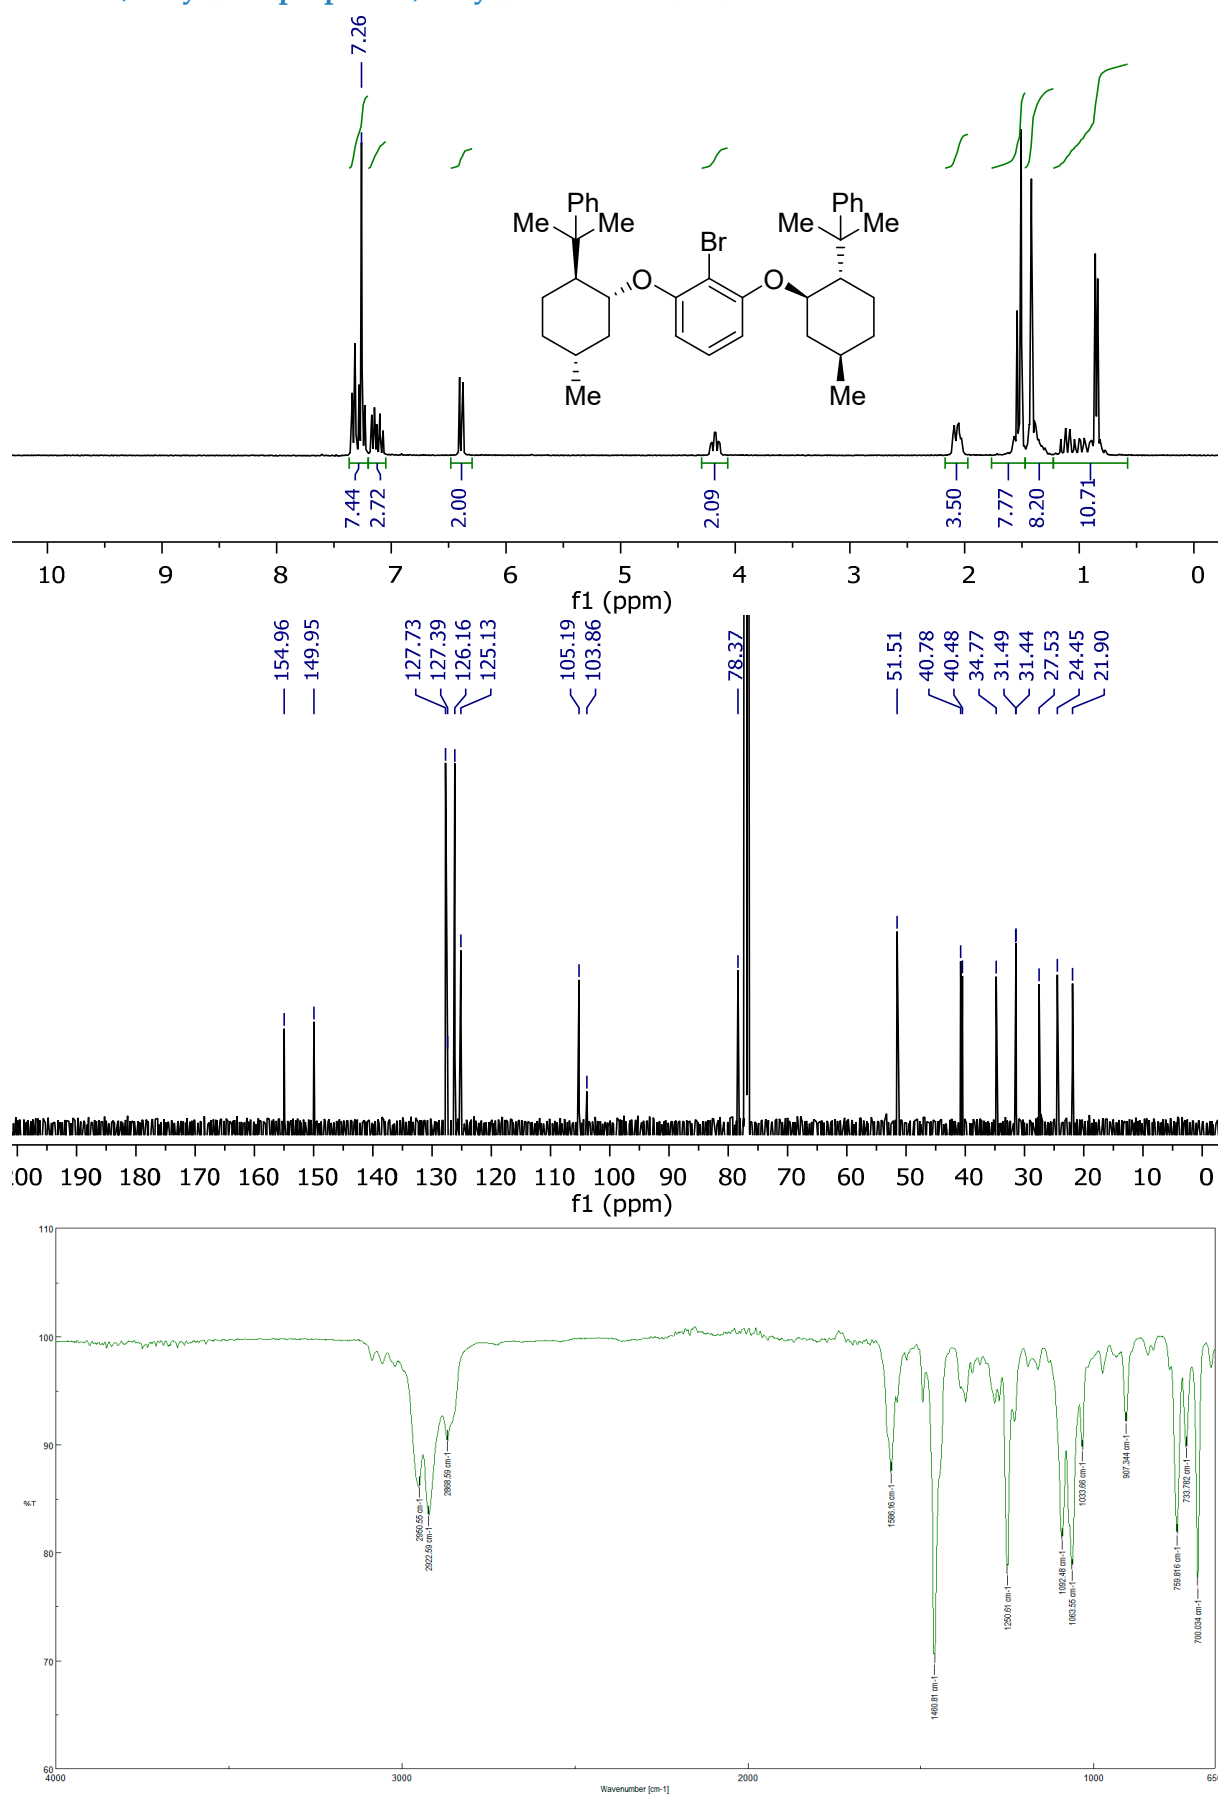

5.3.22 (2,6-bis(((1R,2S,5R)-5-methyl-2-(2-phenylpropan-2-yl)cyclohexyl)oxy)phenyl)(4-methoxybenzyl)selane (14b)

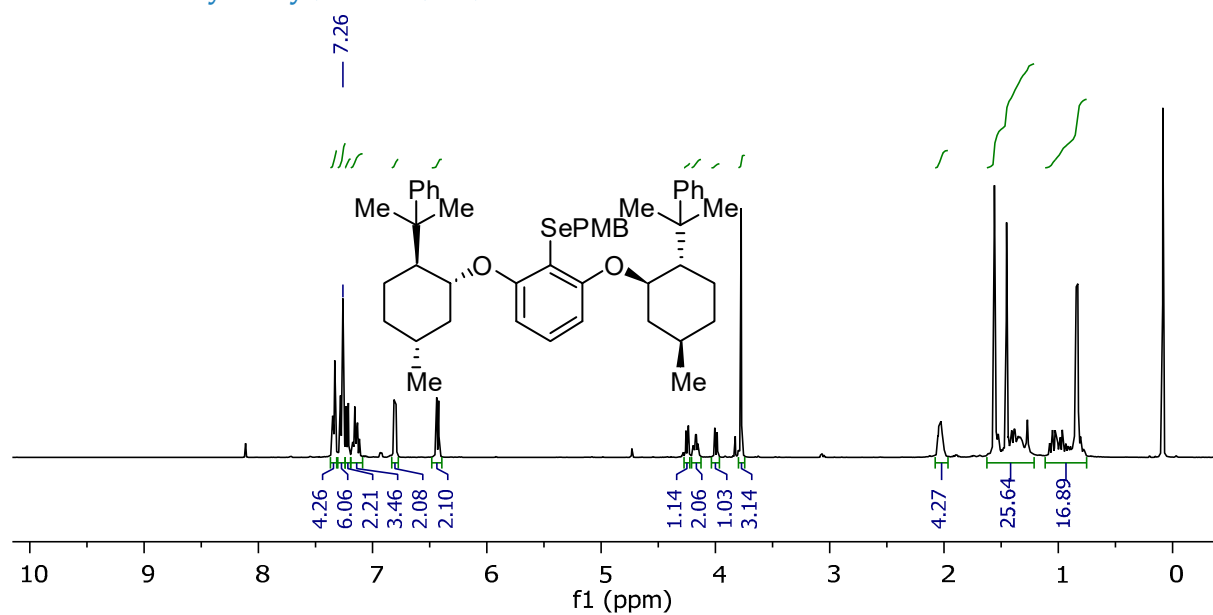

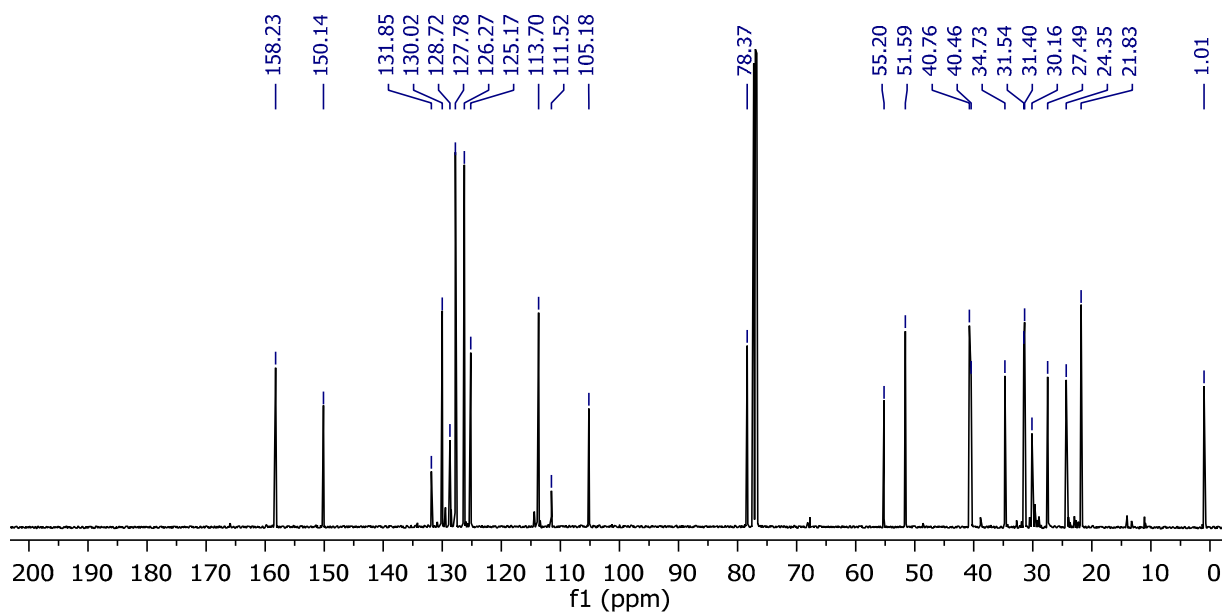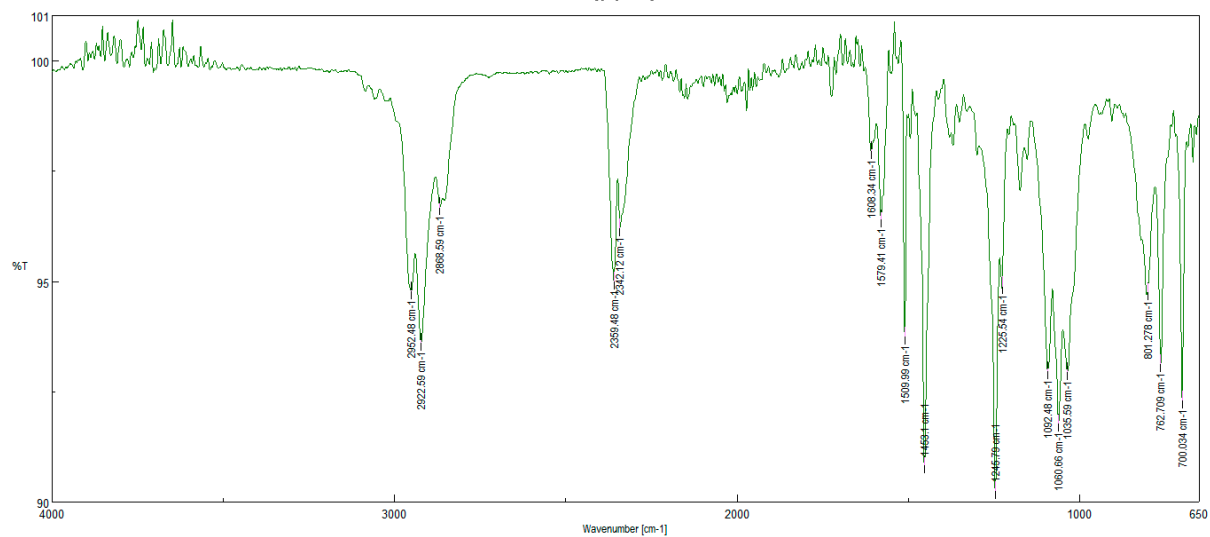

### 5.3.23 1,2-Bis(2-((S)-4-isopropyl-4,5-dihydrooxazol-2-yl)phenyl)diselane(4)

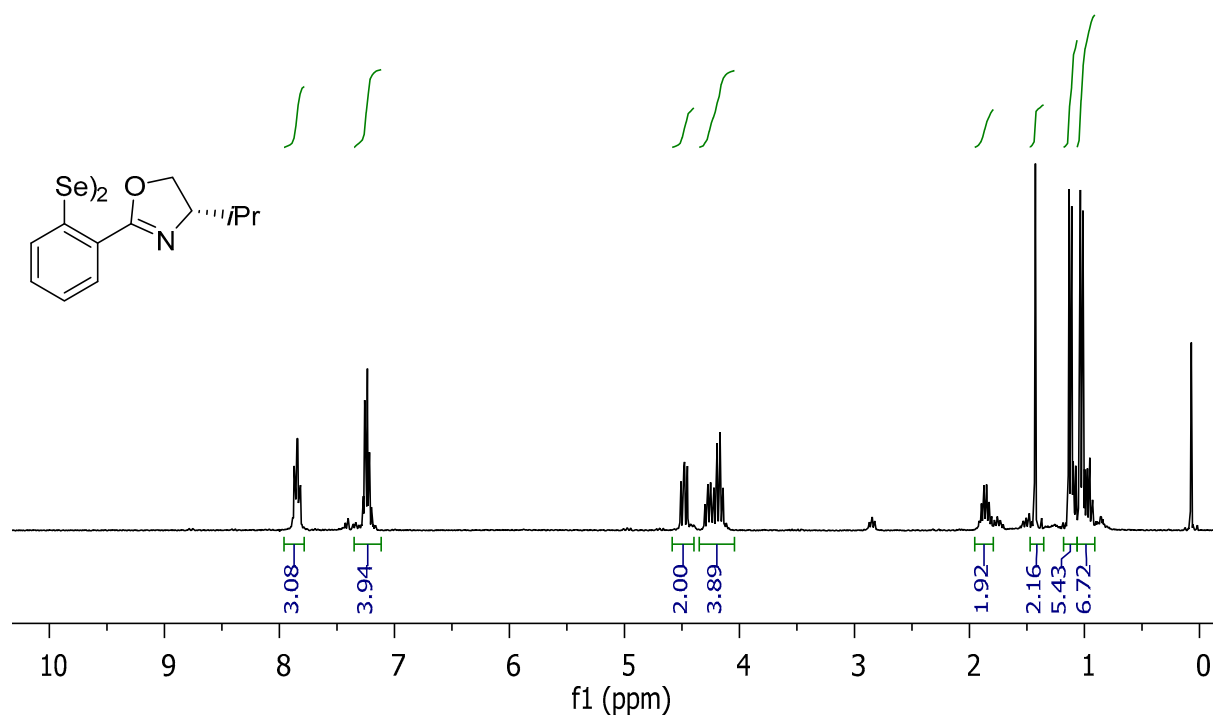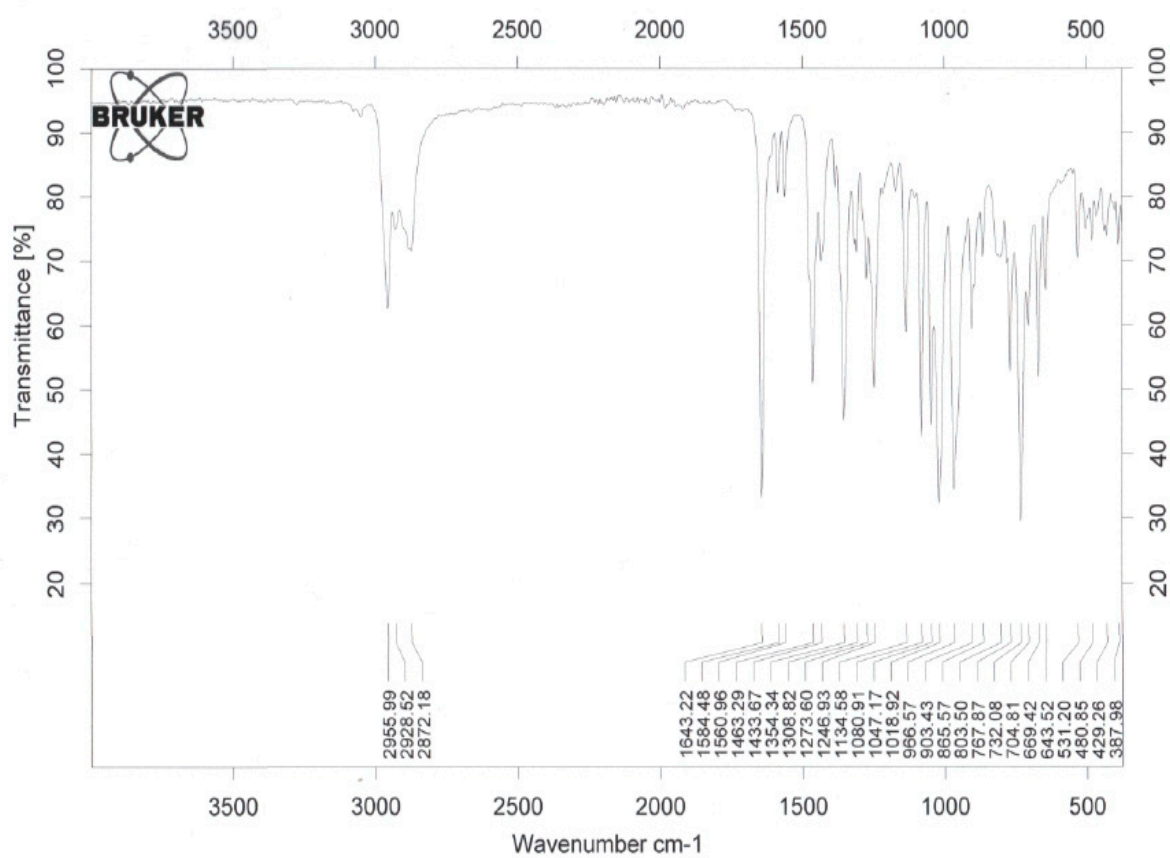

5.3.24 (R)-tert-butyl((6-methoxy-7-((4-methoxybenzyl)selanyl)-2,2-dimethyl-2,3-dihydro-1H-inden-1-yl)oxy)dimethylsilane (23)

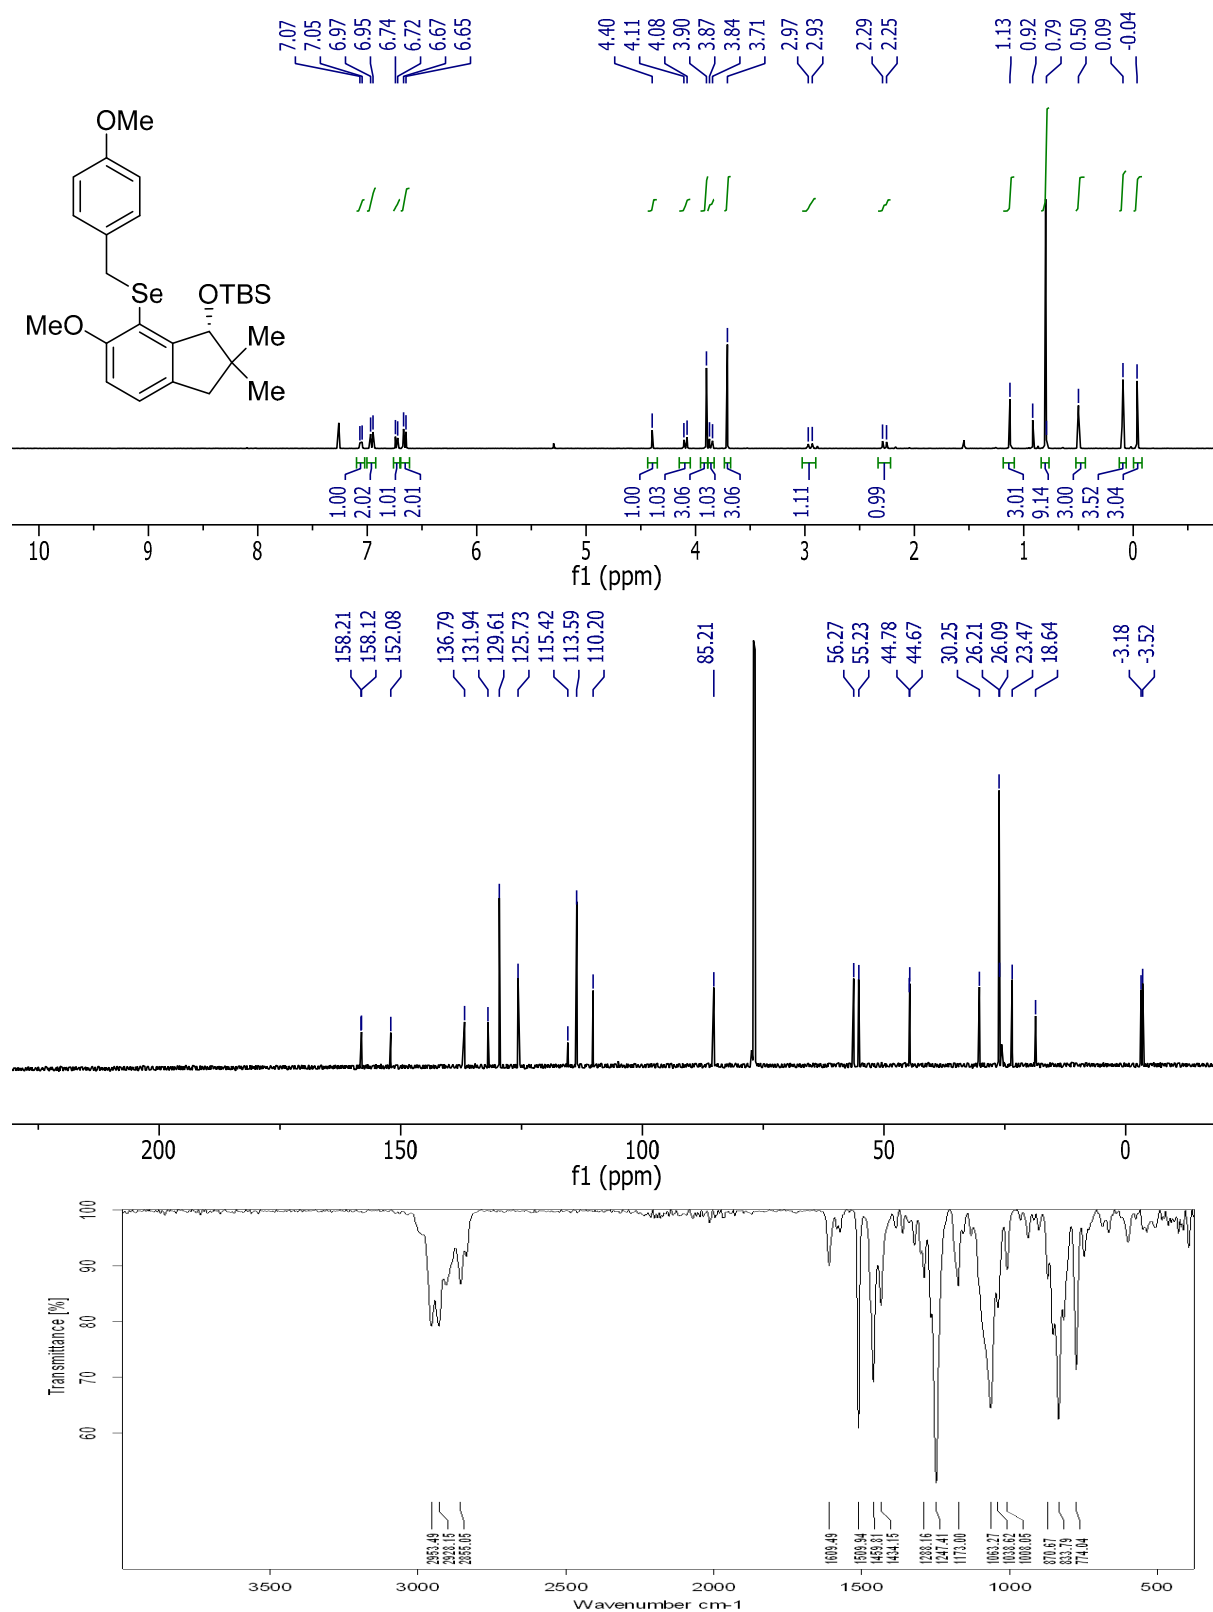

## 5.4 Photocatalysts

### 5.4.1 2,4,6-tris(4-methoxyphenyl)pyrylium tetrafluoroborate (TAPT)

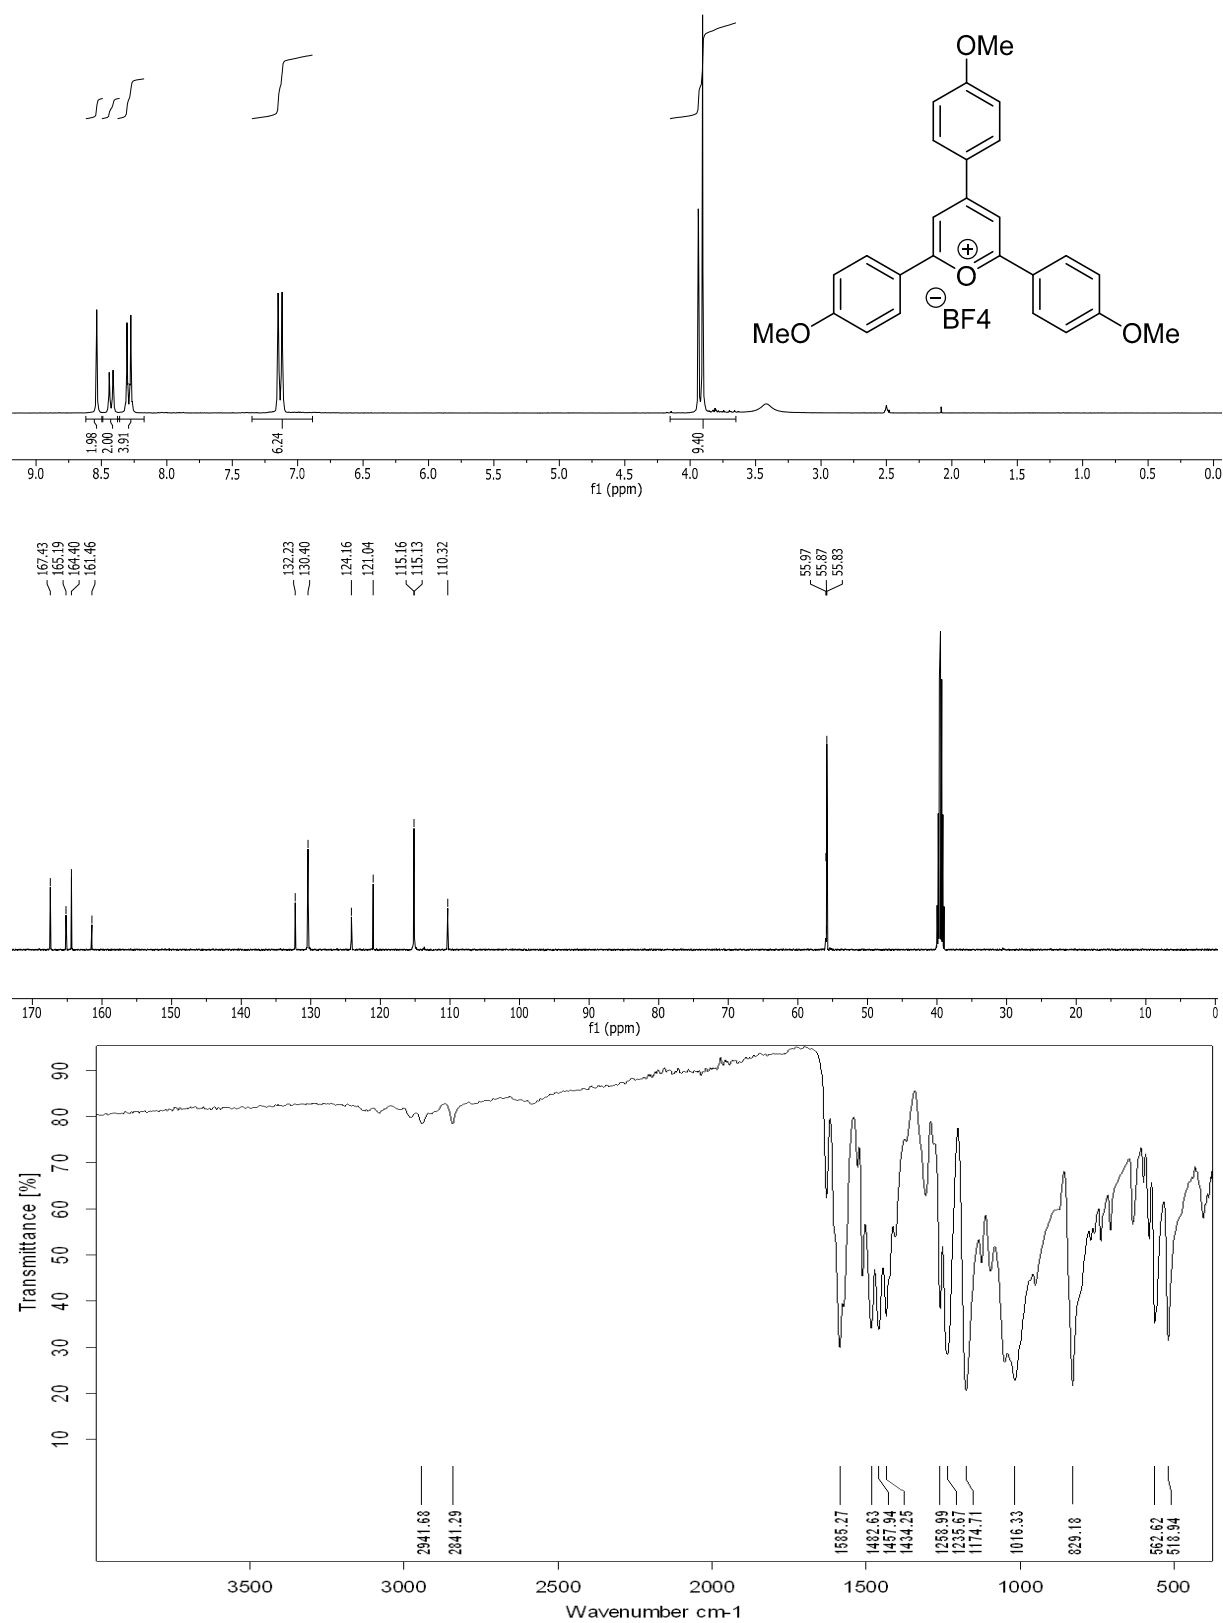

### 5.4.2 2,4,6-tris(4-methoxyphenyl)pyrylium tetraphenylborate (TABTP)

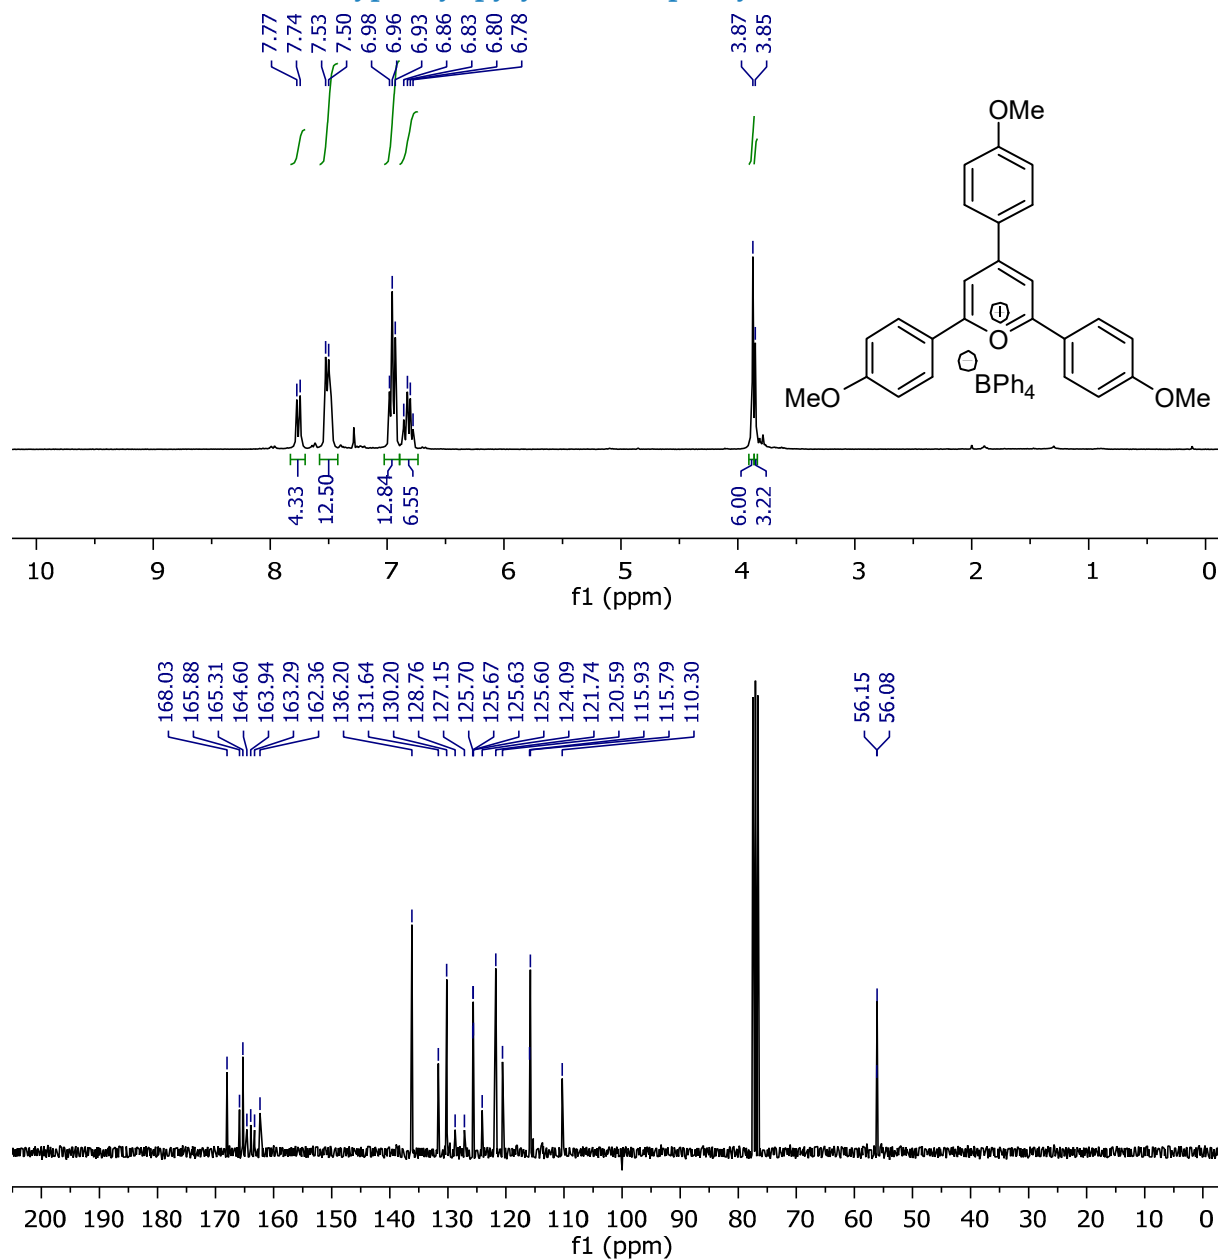

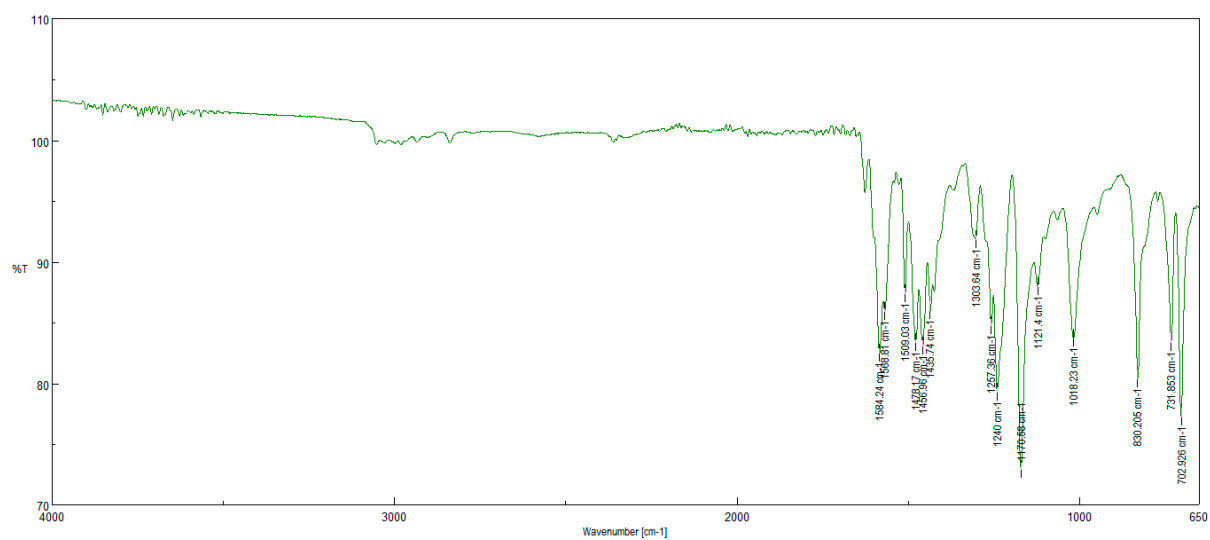

### 5.4.3 10-(3,5-dimethoxyphenyl)-9-mesityl-1,3,6,8-tetramethoxyacridin-10-ium tetrafluoroborate (DMTA)

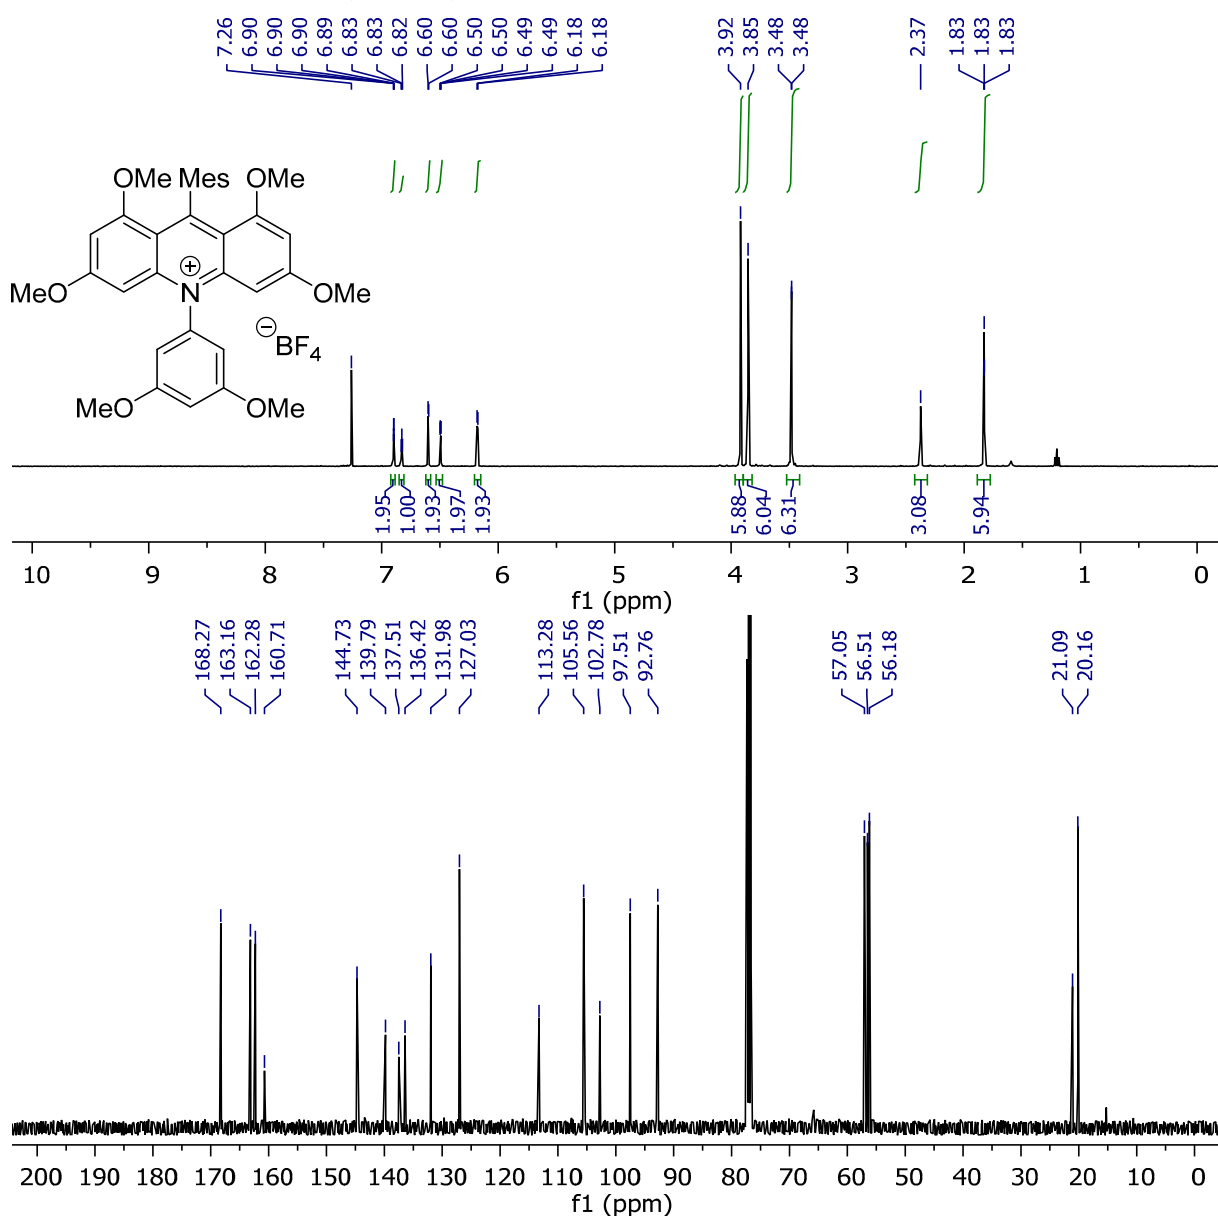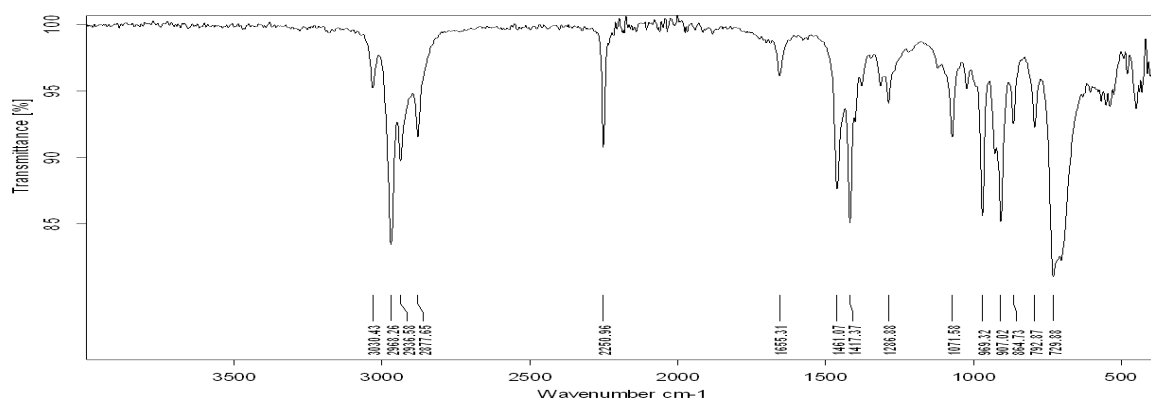

D:\Data\stefan.orgles\so-674-1\_ATR platinum Diamond 1 Refl.0

so-674-1

ATR platinum Diamond 1 Refl

13/01/2017

## 5.5 Asymmetric lactonization

### 5.5.1 5-Benzylfuran-2(5H)-on (22)

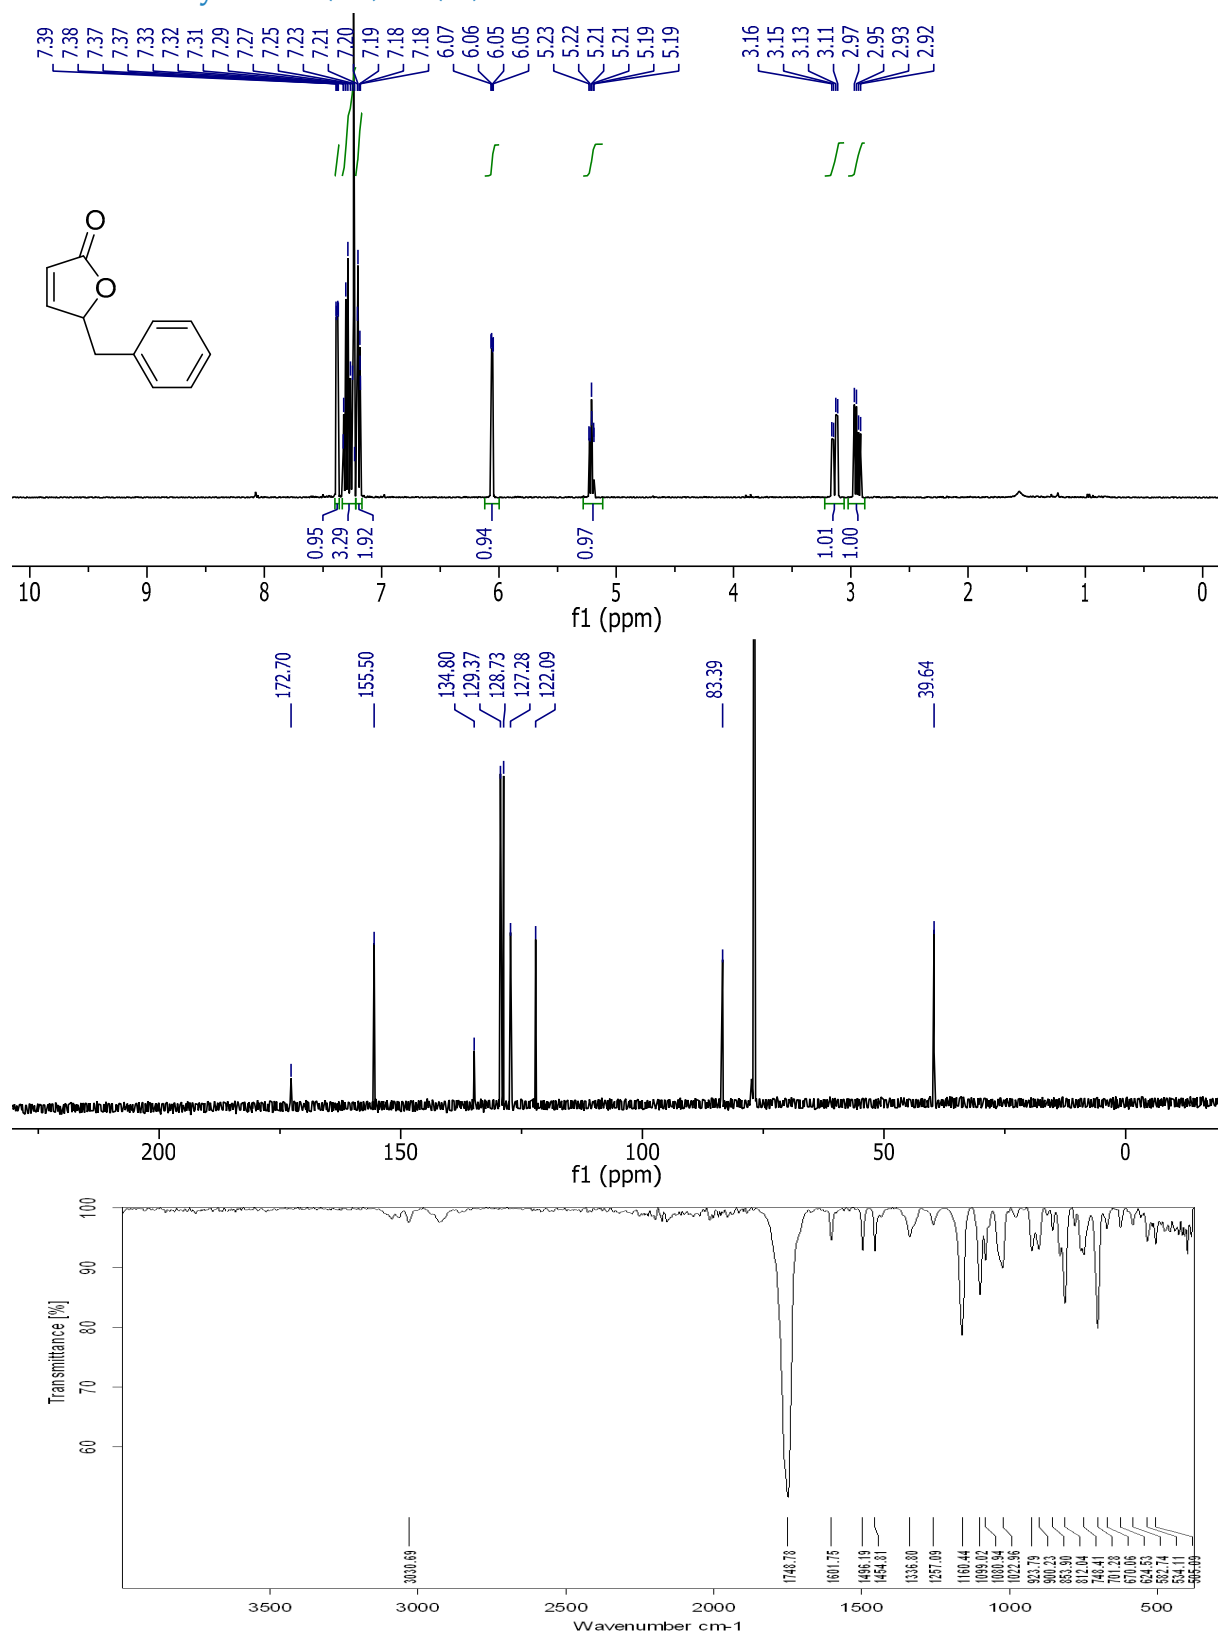

D:\Data\fkraetzsc\FK221-01\_0

FK221-01

04/03/2016

## 6 HPLC Chromatograms

### 6.1 Imidation

#### 6.1.1 Racemate

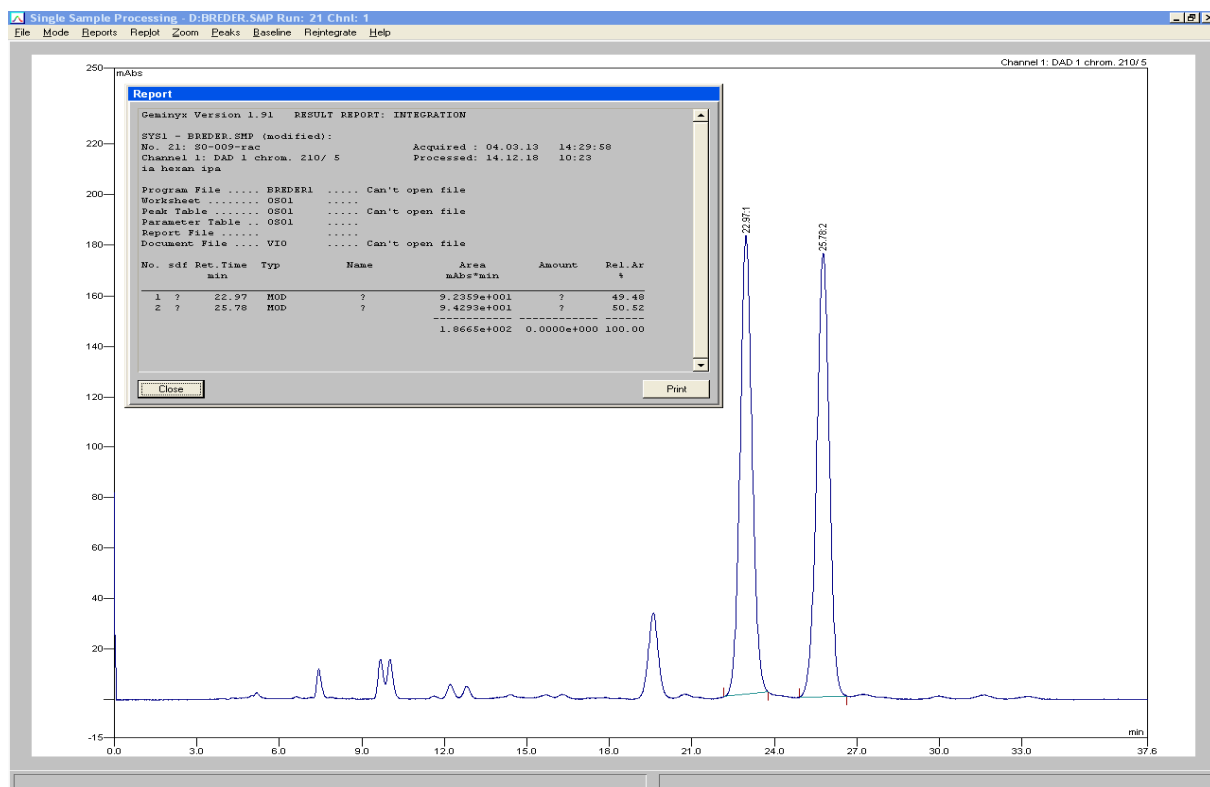

#### 6.1.2 Entry 1

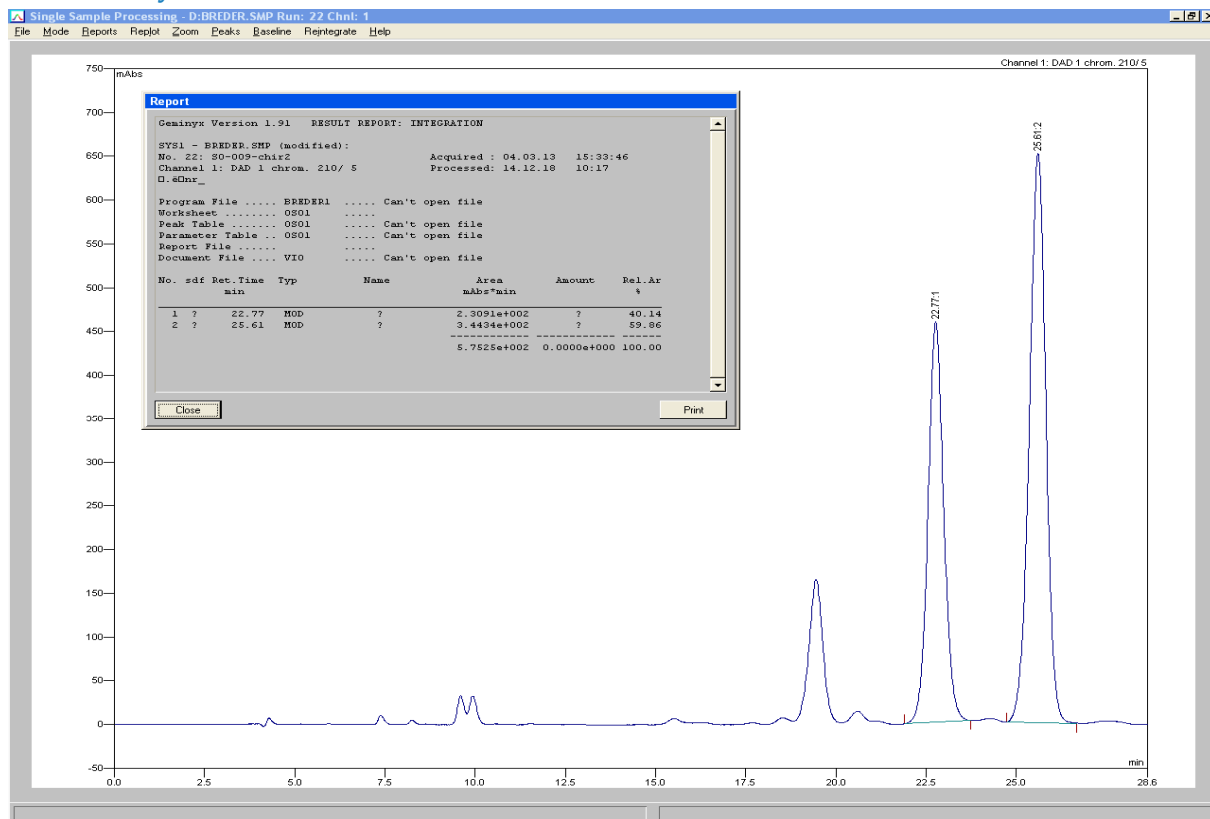

### 6.1.3 Entry 2

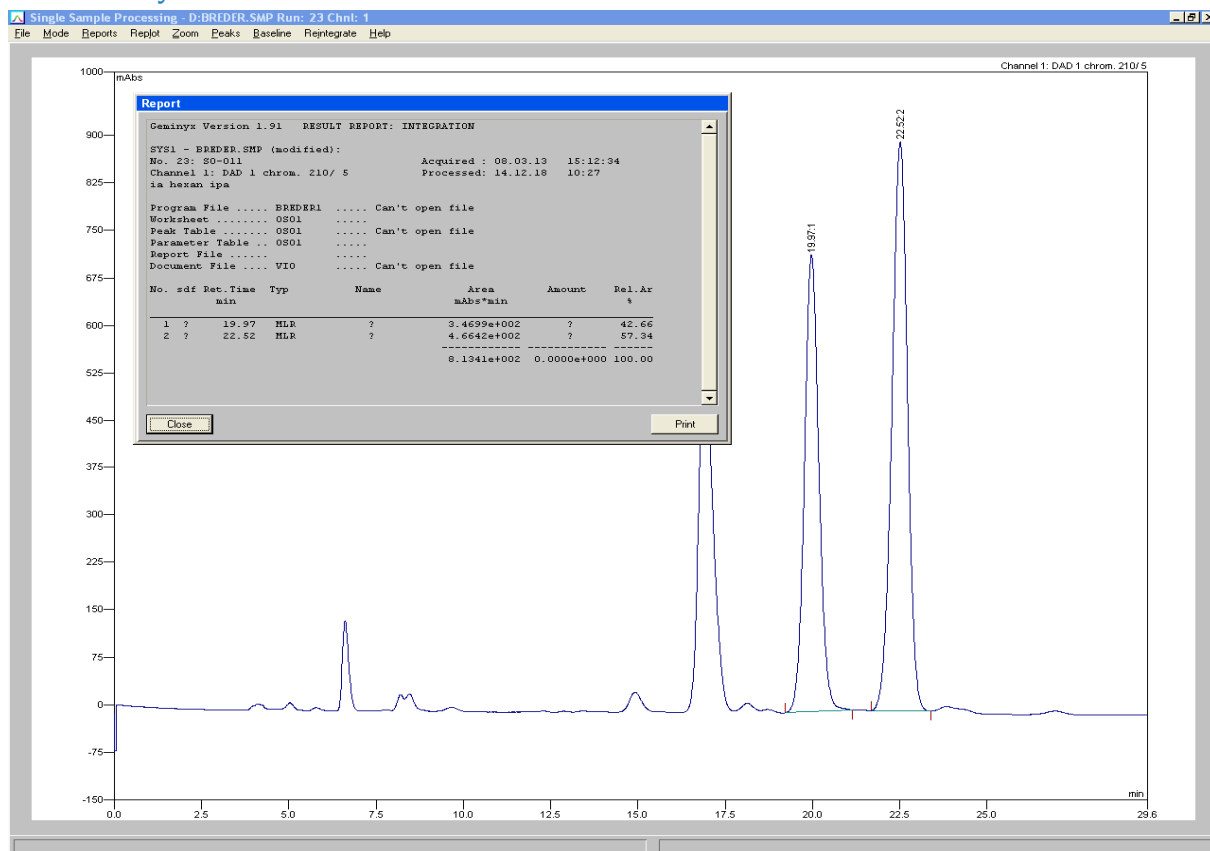

### 6.1.4 Entry 3

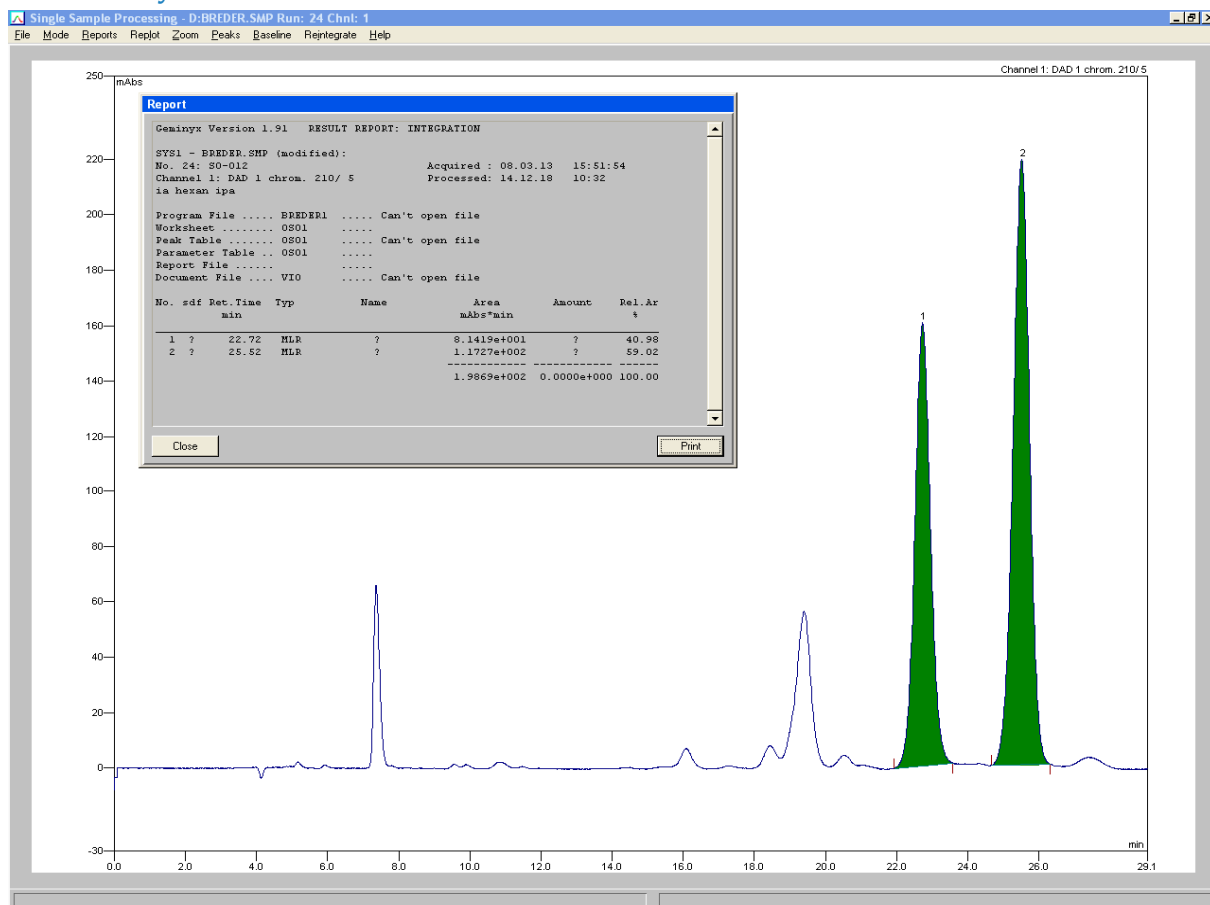

## 6.1.5 Entry4

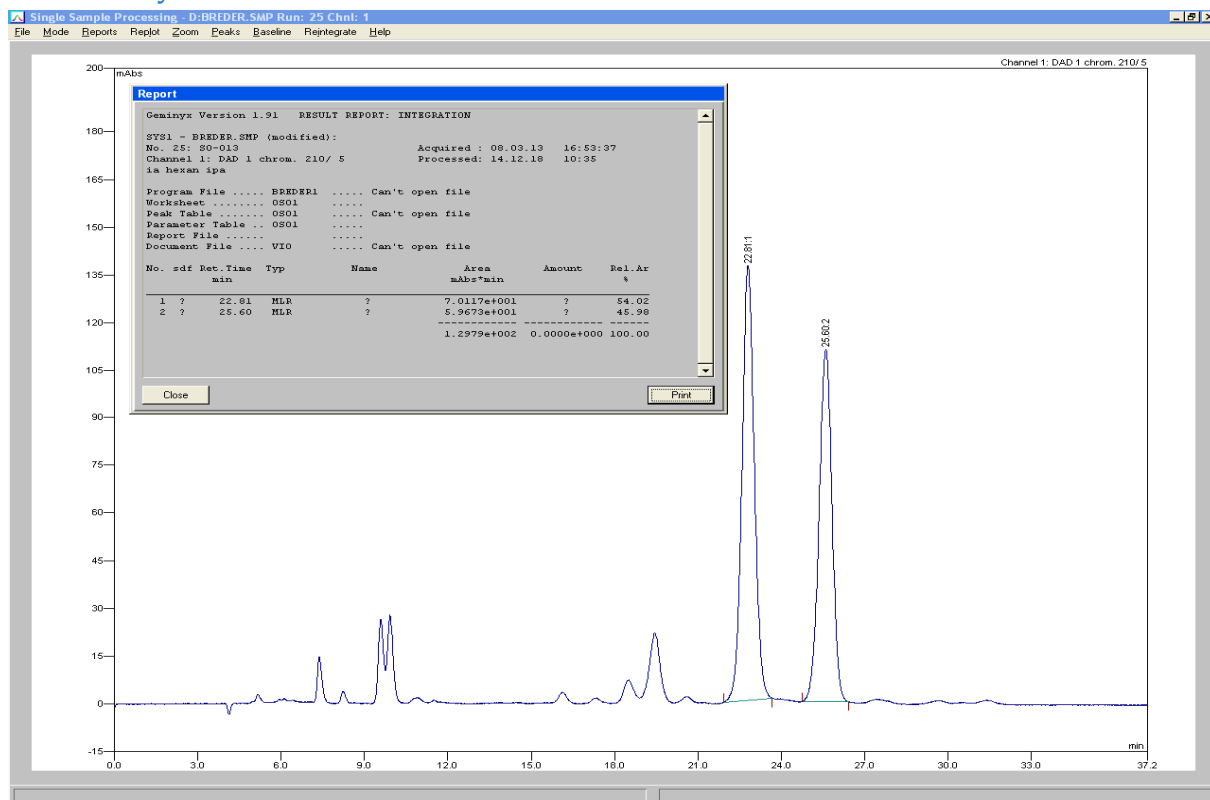

## 6.1.6 Entry 5

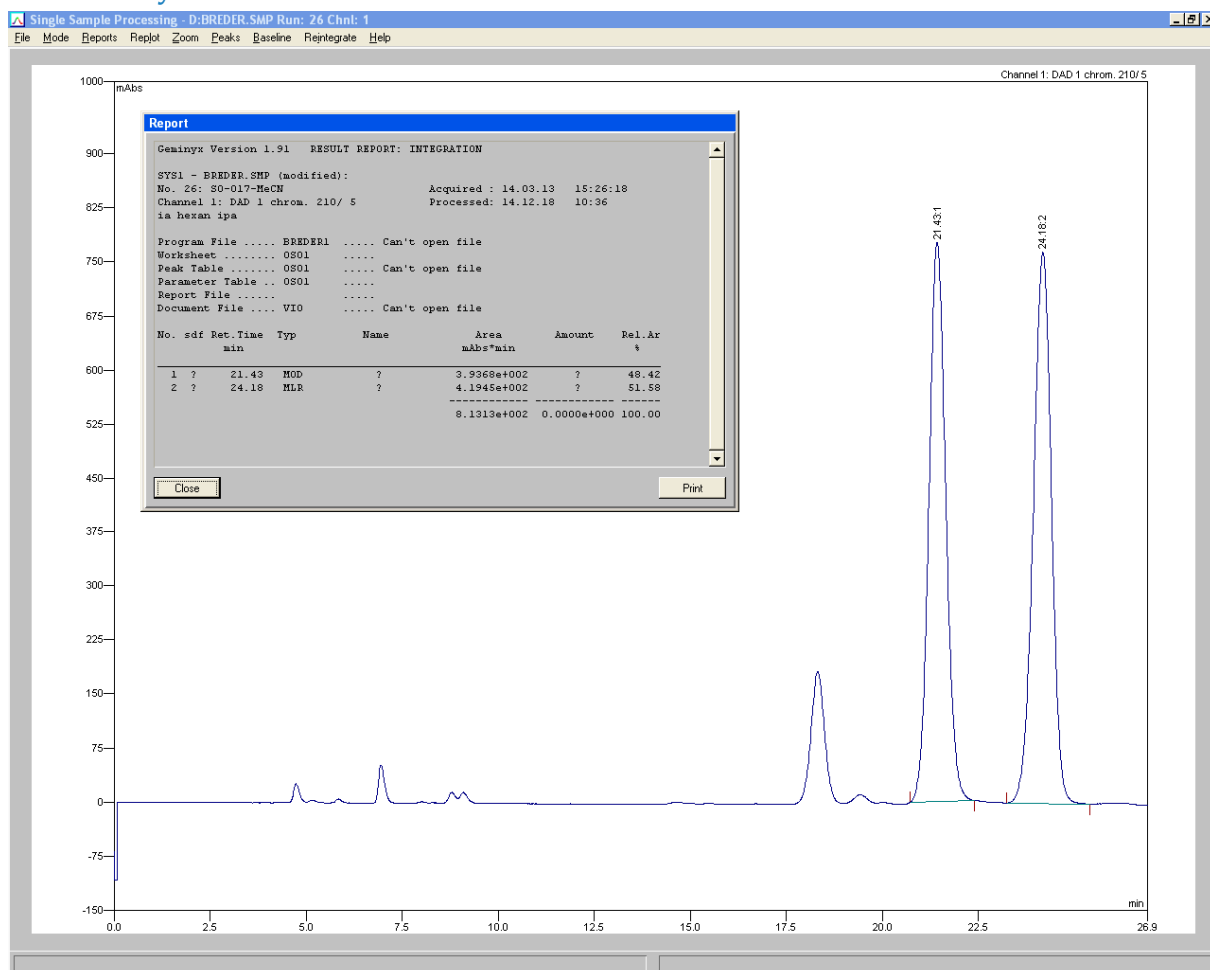

## 6.1.7 Entry 6

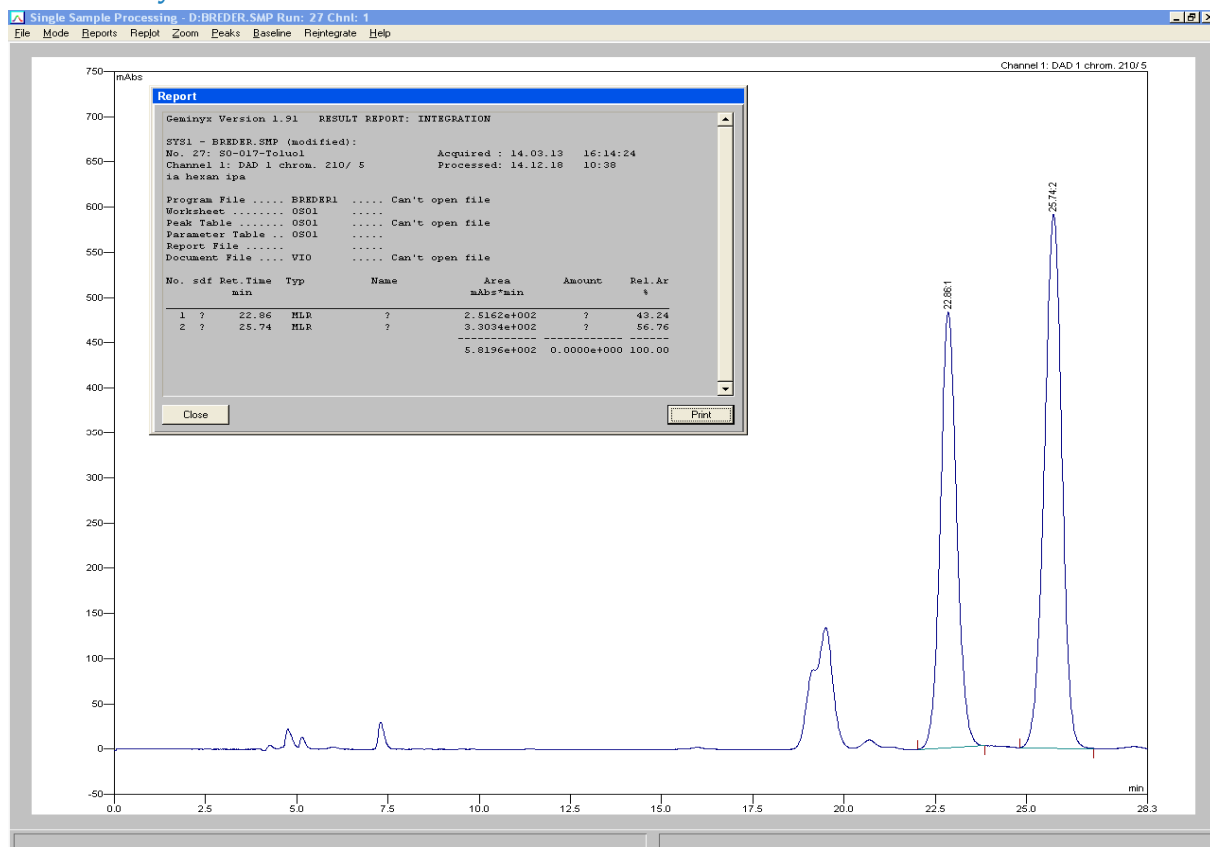

## 6.1.8 Entry 7

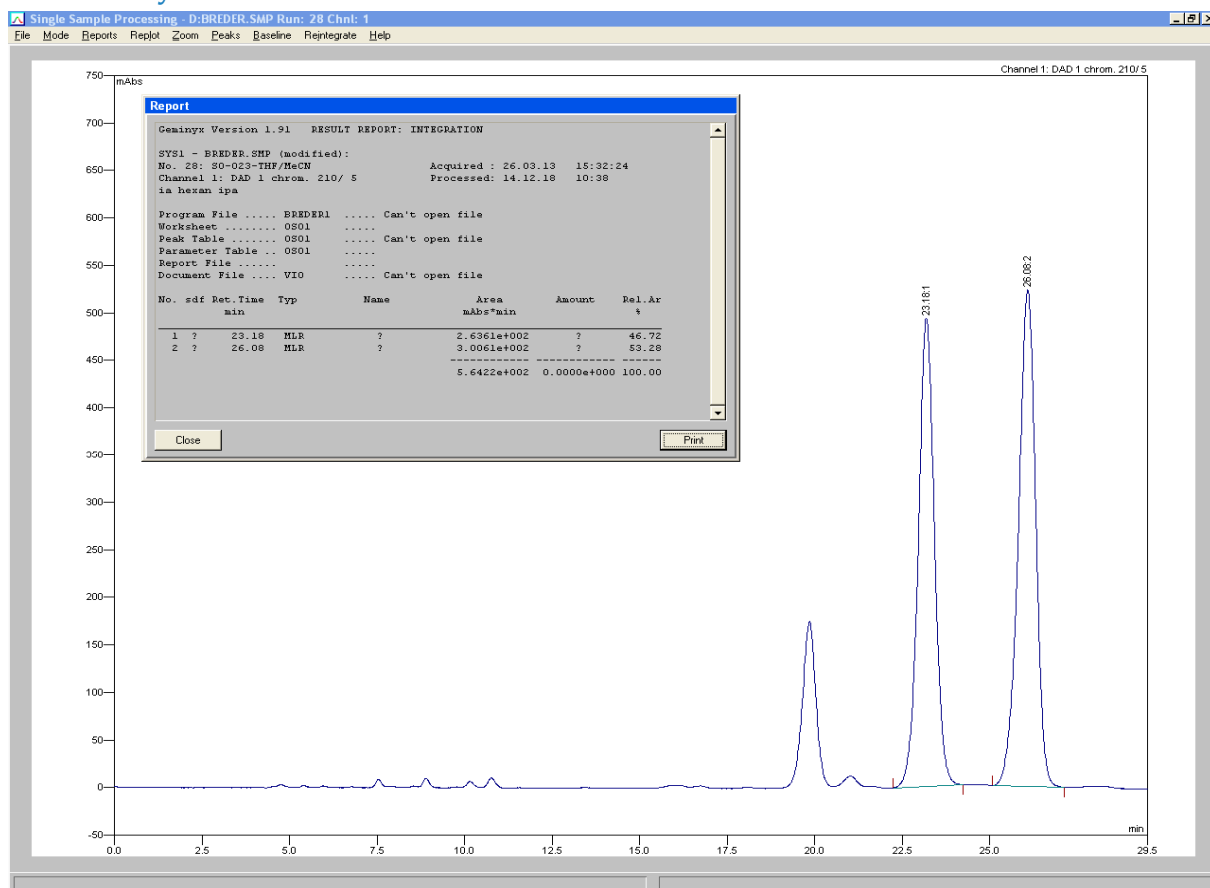

## 6.1.9 Entry 8

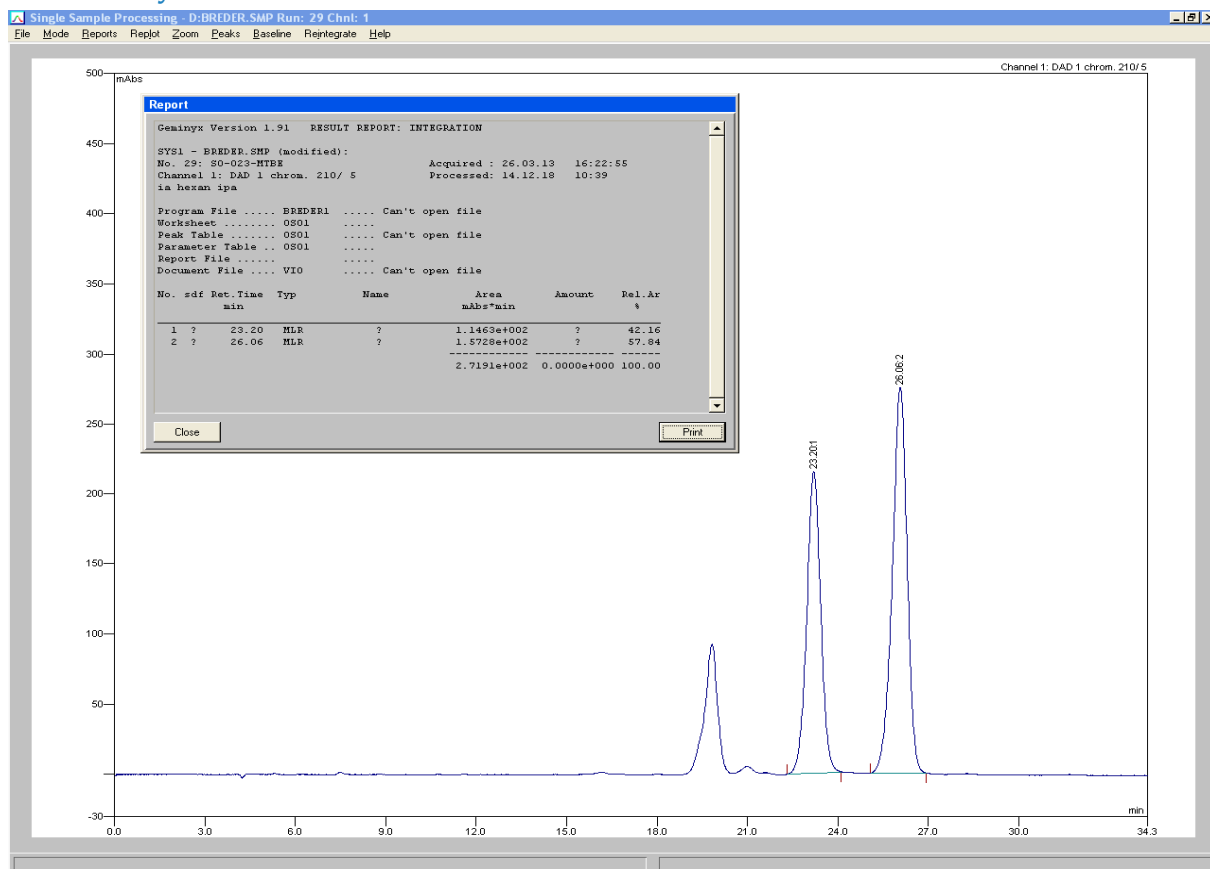

## 6.1.10 Entry 9

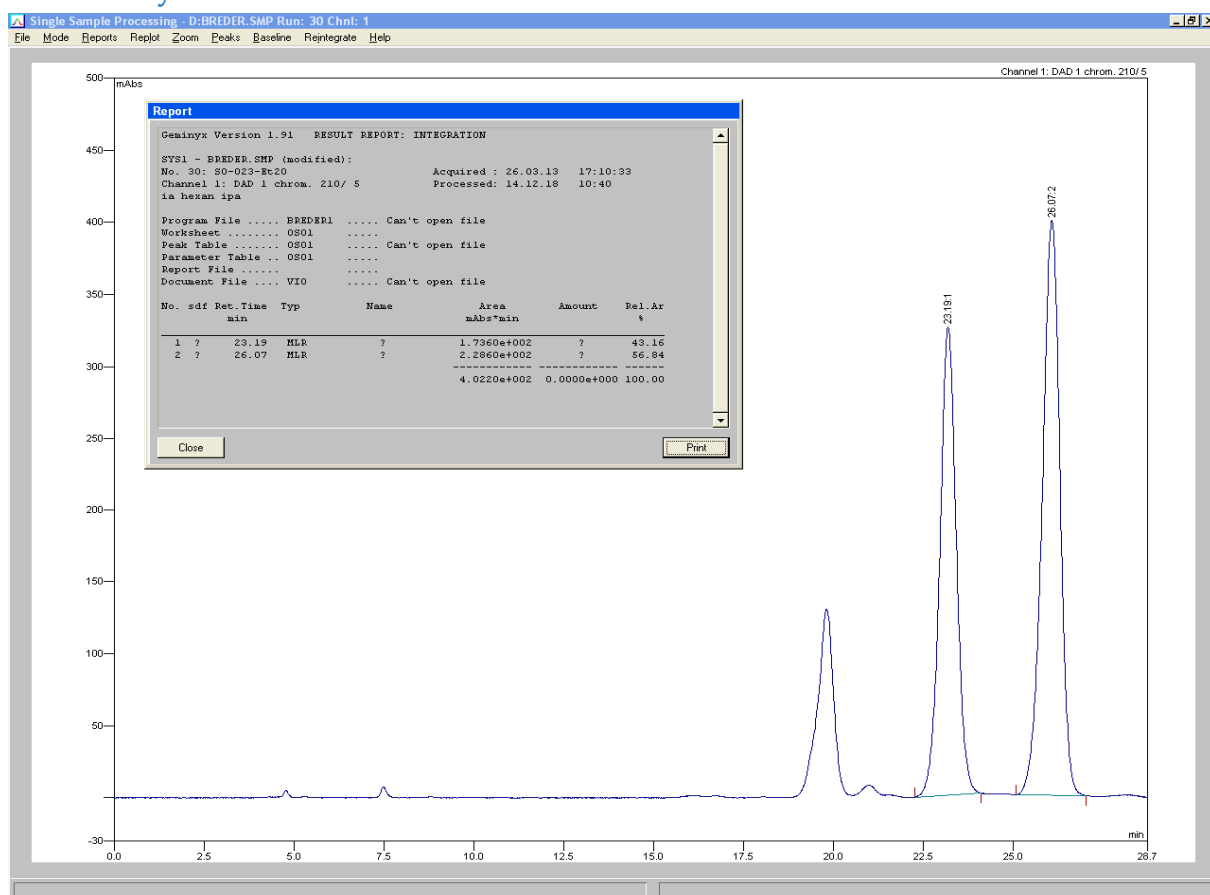

## 6.1.11 Entry 11

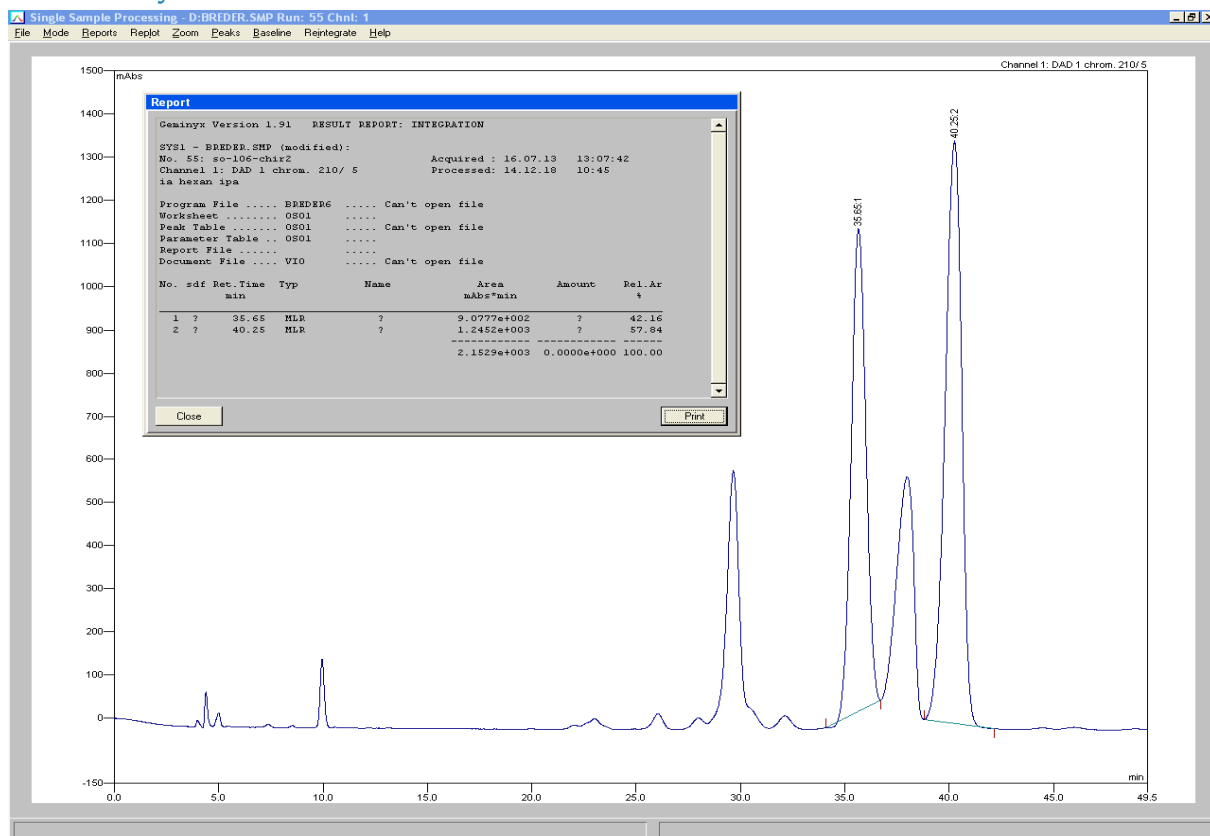

## 6.1.12 Entry 12

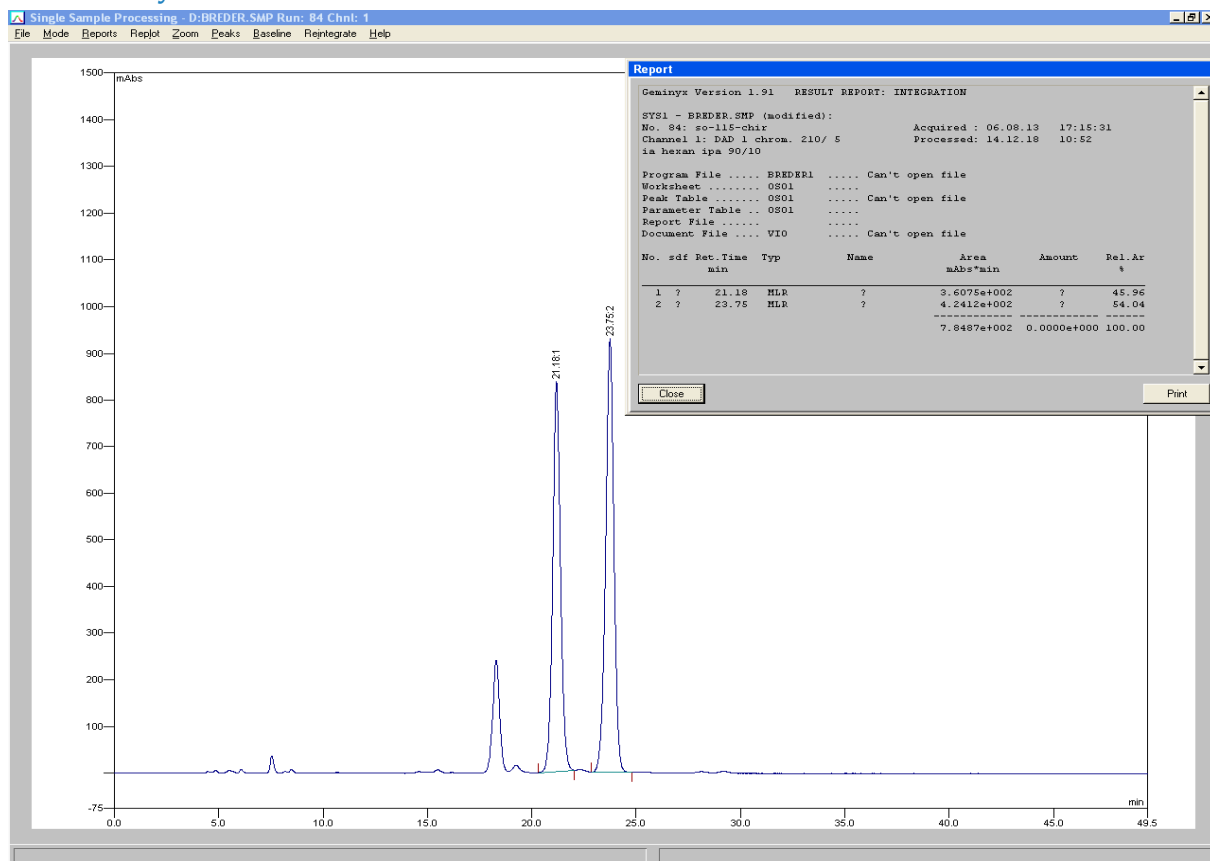

## 6.1.13 Entry 13

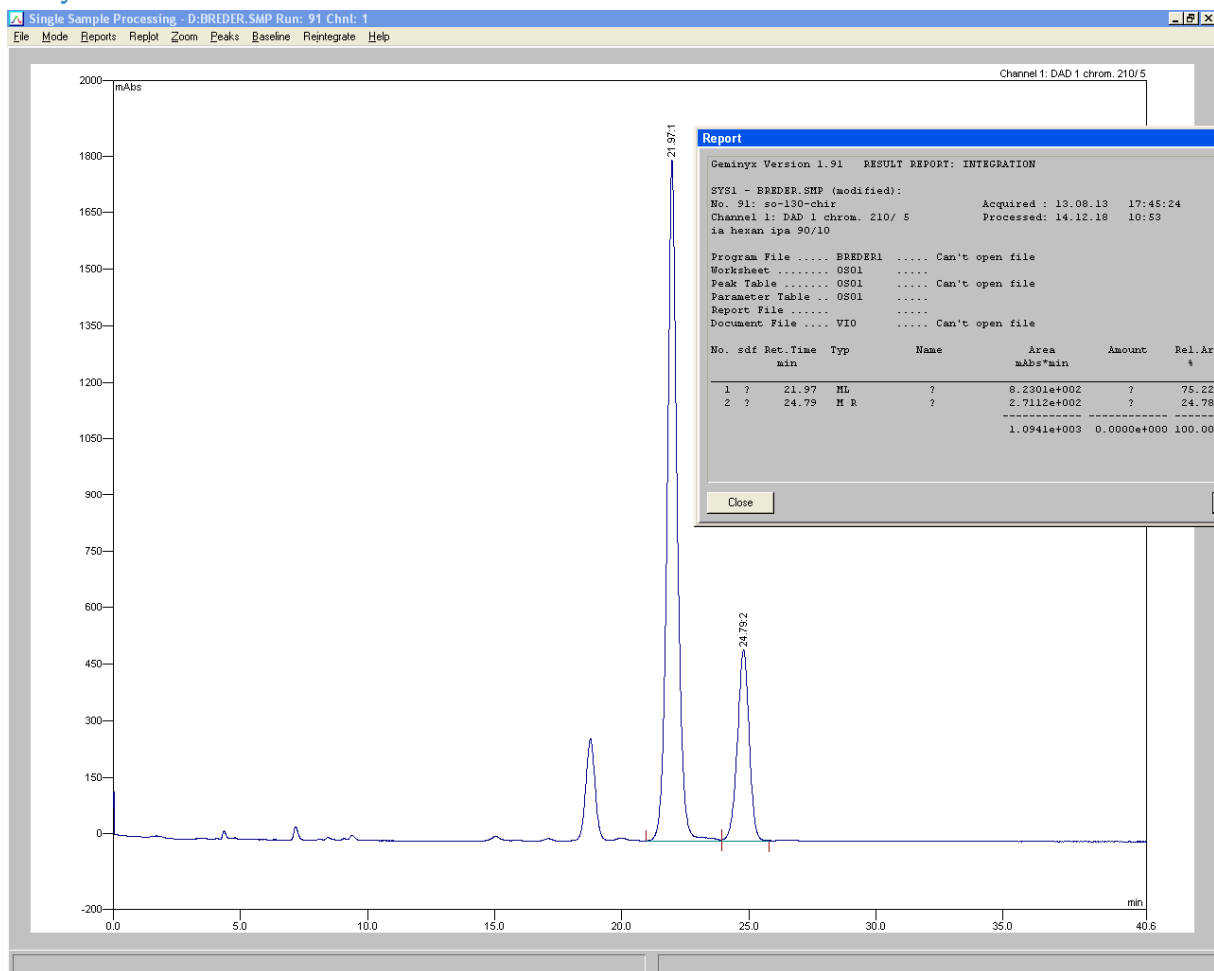

## 6.2 Lactonisation

### 6.2.1 Racemate

#### Single Injection Report

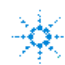

Agilent Technologies

Data file: C:\Data\Felix\Praktikum\FK-Bre04.D  
Sample name: FK-Bre04  
Description: FK-Bre04\_Racemat  
Instrument: LC1260  
Injection date: 11/2/2017 2:40:54 PM  
Acq. method: 10\_90.1\_1.0\_25\_IDM  
Analysis method: 10\_90.1\_1.0\_25\_IDM  
Last changed: 9/16/2016 3:57:01 PM  
Column name: CHIRALPAK ID-3  
Serial #: 555

Injection volume: 10.000  
Acq. operator: SYSTEM  
Sample type: Sample  
Dilution: 1

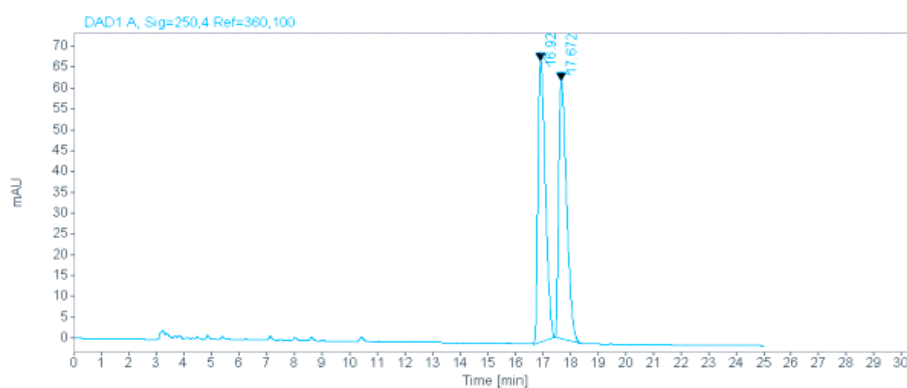

Signal: DAD1 A, Sig=250,4 Ref=360,100

| RT [min] | Type | Width [min] | Area      | Height  | Area%   | Name |
|----------|------|-------------|-----------|---------|---------|------|
| 16.920   | MM   | 0.3071      | 1242.6899 | 67.4498 | 50.2540 |      |
| 17.672   | MM   | 0.3316      | 1230.1281 | 61.8351 | 49.7460 |      |
|          |      | Sum         | 2472.8180 |         |         |      |

### 6.2.2 Entry 1

# Single Injection Report

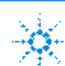

Agilent Technologies

**Data file:** C:\Data\Felix\Praktikum\FK-Bre04\_Gruppe12.D  
**Sample name:** FK-Bre04\_Gruppe12  
**Description:** FK-Bre04\_Menthol-Kat  
**Instrument:** LC1260  
**Injection date:** 11/17/2017 3:15:14 PM  
**Acq. method:** 10\_90.1\_1.0\_25\_IDM  
**Analysis method:** 10\_90.1\_1.0\_25\_IDM  
**Last changed:** 9/16/2016 3:57:01 PM  
**Column name:** CHIRALPAK ID-3  
**Serial #:** 555  
**Injection volume:** 10.000  
**Acq. operator:** SYSTEM  
**Sample type:** Sample  
**Dilution:** 1

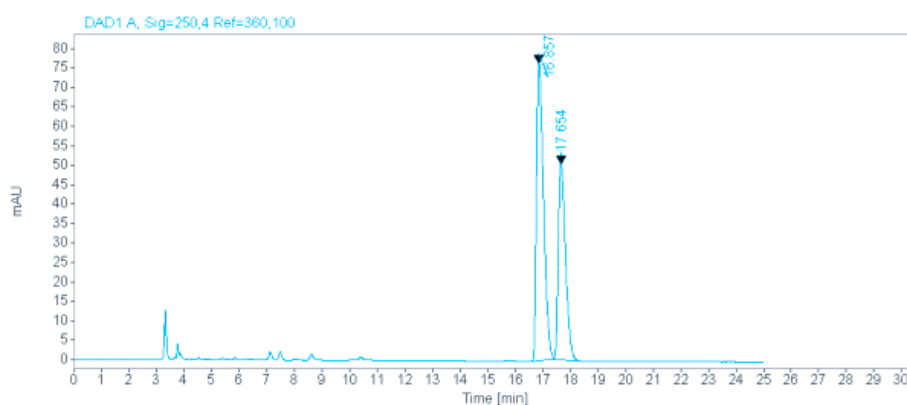

Signal: DAD1 A, Sig=250,4 Ref=360,100

| RT [min] | Type | Width [min] | Area      | Height  | Area%   | Name |
|----------|------|-------------|-----------|---------|---------|------|
| 16.857   | MM   | 0.2969      | 1362.2036 | 76.4608 | 59.6493 |      |
| 17.654   | MM   | 0.3042      | 921.4839  | 50.4820 | 40.3507 |      |
| Sum      |      |             | 2283.6875 |         |         |      |

## 6.2.3 Entry 2

### Single Injection Report

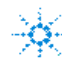

Agilent Technologies

**Data file:** C:\Data\Felix\Induktion\_neuerKat\_221\Induktion\_neuerKat\_221 2016-03-01 18-13  
**Sample name:** -37\FK221-01.D  
**Description:** FK221-01  
**Instrument:** LC1260  
**Injection date:** 3/1/2016 6:14:37 PM  
**Acq. method:** 20\_99\_0.9\_70\_ODM  
**Analysis method:** 20\_99\_0.9\_70\_OD  
**Last changed:** 3/1/2016 5:50:23 PM  
**Column name:** CHIRALCELOD-3  
**Serial #:** 444

**Injection volume:** 20.000  
**Acq. operator:** SYSTEM  
**Sample type:** Sample  
**Dilution:** 1

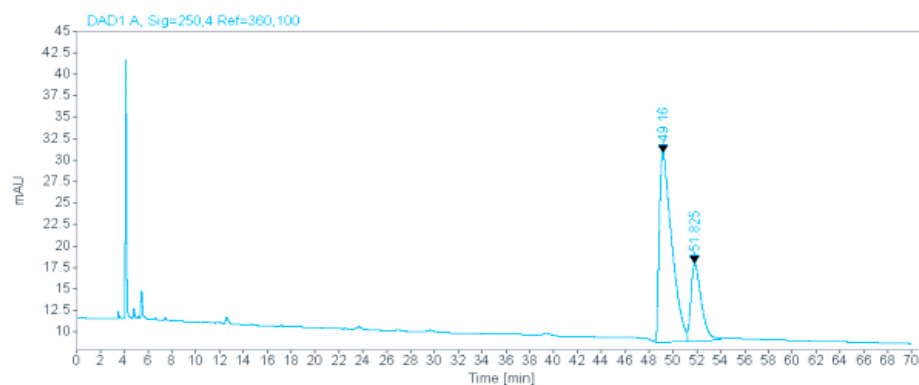

**Signal:** DAD1 A, Sig=250,4 Ref=360,100

| RT [min] | Type | Width [min] | Area      | Height  | Area%   | Name |
|----------|------|-------------|-----------|---------|---------|------|
| 49.160   | MF   | 1.2046      | 1590.5411 | 22.0060 | 74.2714 |      |
| 51.825   | FM   | 1.0229      | 550.9844  | 8.9779  | 25.7286 |      |
| Sum      |      |             | 2141.5256 |         |         |      |

#### 6.2.4 Entry 4

## Single Injection Report



Agilent Technologies

**Data file:** C:\Data\Felix\Induktion\_neuerKat\_221\Induktion\_neuerKat\_221 2016-03-01 18-13  
-37\FK221-03.D  
**Sample name:** FK221-03  
**Description:**  
**Instrument:** LC1260  
**Injection date:** 3/1/2016 8:36:43 PM  
**Acq. method:** 20\_99\_0.9\_70\_ODM  
**Analysis method:** 20\_99\_0.9\_70\_OD.M  
**Last changed:** 3/1/2016 5:50:23 PM  
**Column name:** CHIRALCELOD-3  
**Serial #:** 444

**Injection volume:** 20.000  
**Acq. operator:** SYSTEM  
**Sample type:** Sample  
**Dilution:** 1

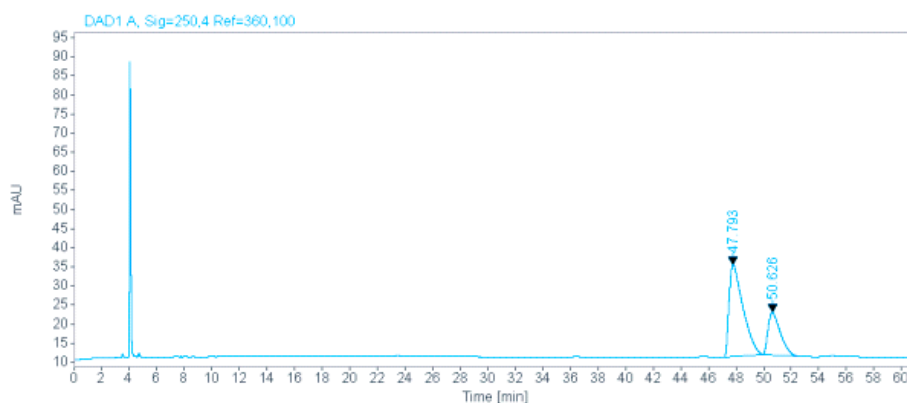

Signal: DAD1 A, Sig=250,4 Ref=360,100

| RT [min] | Type | Width [min] | Area      | Height  | Area%   | Name |
|----------|------|-------------|-----------|---------|---------|------|
| 47.793   | BB   | 1.0049      | 1689.7697 | 24.1333 | 71.0134 |      |
| 50.626   | BB   | 0.8932      | 689.7393  | 11.0654 | 28.9866 |      |
| Sum      |      |             | 2379.5090 |         |         |      |

### 6.2.5 Entry 5

# Single Injection Report



Agilent Technologies

Data file: C:\Data\Felix\Induktion\_neuerKat\_221\FK221-15\_Ph-Menth\_0°C.D

Sample name: FK221-15\_Ph-Menth\_0°C

Description: 10\_90.1\_1.0\_25\_ID FK221-15\_Ph-Menth\_0°C

Instrument: LC1260

Injection date: 9/16/2016 6:03:34 PM

Acq. method: 10\_90.1\_1.0\_25\_ID.M

Analysis method: 10\_90.1\_1.0\_25\_ID.M

Last changed: 6/5/2018 5:13:20 PM

Column name: CHIRALPAK ID-3

Serial #: 555

Injection volume: 10.000

Acq. operator: SYSTEM

Sample type: Sample

Dilution: 1

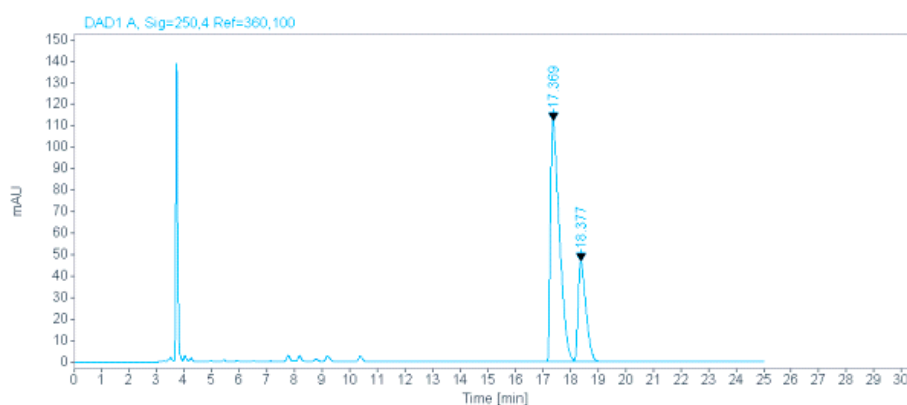

Signal: DAD1 A, Sig=250,4 Ref=360,100

| RT [min] | Type | Width [min] | Area      | Height   | Area%   | Name |
|----------|------|-------------|-----------|----------|---------|------|
| 17.369   | BV   | 0.3374      | 2534.8894 | 112.2577 | 73.2480 |      |
| 18.377   | VB   | 0.3059      | 925.8031  | 46.5747  | 26.7520 |      |
|          |      | Sum         | 3460.6925 |          |         |      |

### 6.2.6 Entry 6

# Single Injection Report



Agilent Technologies

**Data file:** C:\Data\Felix\Induktion\_neuerKat\_221\FK221-41.D  
**Sample name:** FK221-41  
**Description:** FK221-40 Decalinol Kat  
**Instrument:** LC1260  
**Injection date:** 11/2/2018 4:29:30 PM  
**Acq. method:** 10\_90.1\_1.0\_25\_IDM  
**Analysis method:** 10\_90.1\_1.0\_25\_IDM  
**Last changed:** 6/5/2018 5:13:20 PM  
**Column name:** CHIRALPAK ID-3  
**Serial #:** 555

**Injection volume:** 10.000  
**Acq. operator:** SYSTEM  
**Sample type:** Sample  
**Dilution:** 1

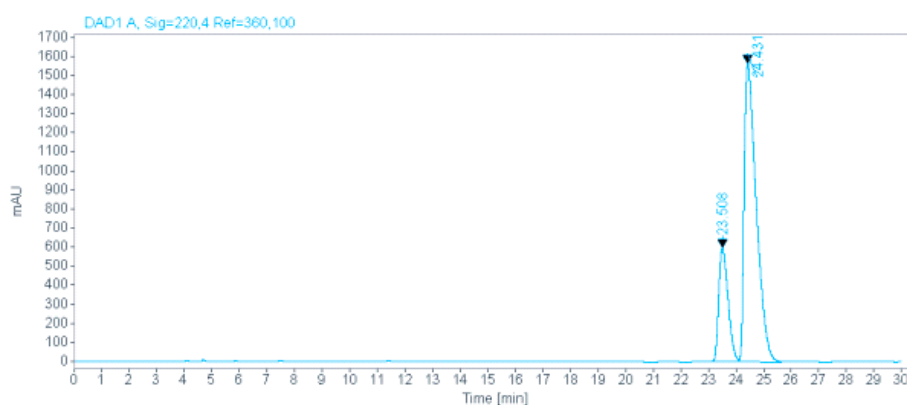

**Signal:** DAD1 A, Sig=220,4 Ref=360,100

| RT [min] | Type | Width [min] | Area       | Height    | Area%   | Name |
|----------|------|-------------|------------|-----------|---------|------|
| 23.508   | MM   | 0.3921      | 14020.5664 | 595.9428  | 22.7235 |      |
| 24.431   | MM   | 0.5080      | 47680.1875 | 1564.3646 | 77.2765 |      |
| Sum      |      |             | 61700.7539 |           |         |      |

### 6.2.7 Entry 7

# Single Injection Report



Agilent Technologies

**Data file:** C:\Data\Felix\Induktion\_neuerKat\_221\FK221-42.D  
**Sample name:** FK221-42  
**Description:** FK221-42 Decalinol Kat DCE  
**Instrument:** LC1260  
**Injection date:** 11/8/2018 10:59:48 AM  
**Acq. method:** 10\_90.1\_1.0\_25\_IDM  
**Analysis method:** 10\_90.1\_1.0\_25\_IDM  
**Last changed:** 6/5/2018 5:13:20 PM  
**Column name:** CHIRALPAK ID-3  
**Serial #:** 555

**Injection volume:** 10.000  
**Acq. operator:** SYSTEM  
**Sample type:** Sample  
**Dilution:** 1

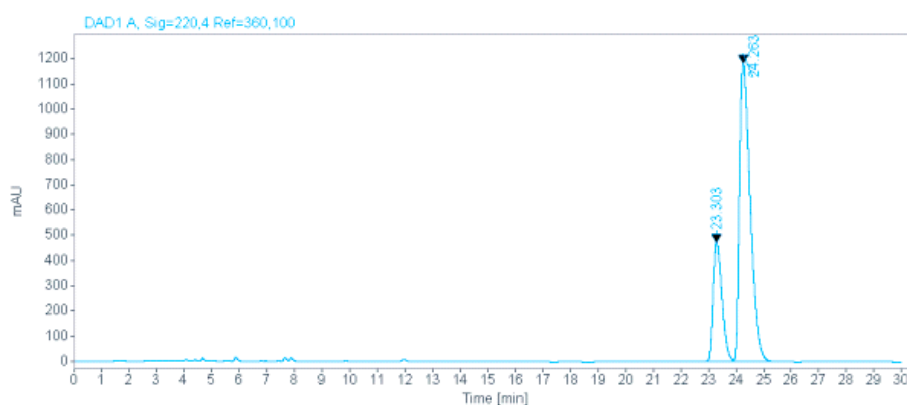

**Signal:** DAD1 A, Sig=220,4 Ref=360,100

| RT [min] | Type | Width [min] | Area       | Height    | Area%   | Name |
|----------|------|-------------|------------|-----------|---------|------|
| 23.303   | BV   | 0.3480      | 10534.7627 | 472.6717  | 25.0152 |      |
| 24.263   | VB   | 0.4141      | 31578.7324 | 1180.6094 | 74.9848 |      |
| Sum      |      |             | 42113.4951 |           |         |      |

### 6.2.8 Entry 8

# Single Injection Report



Agilent Technologies

**Data file:** C:\Data\Felix\Induktion\_neuerKat\_221\FK221-46.D

**Sample name:** FK221-46

**Description:** FK221-46 Borneol Kat. entspricht FK221-02

**Instrument:** LC1260

**Injection date:** 12/17/2018 5:03:16 PM

**Acq. method:** 10\_90.1\_1.0\_25\_IDM

**Analysis method:** 10\_90.1\_1.0\_25\_IDM

**Last changed:** 6/5/2018 5:13:20 PM

**Column name:**

**Serial #:**

**Injection volume:** 10.000

**Acq. operator:** SYSTEM

**Sample type:** Sample

**Dilution:** 1

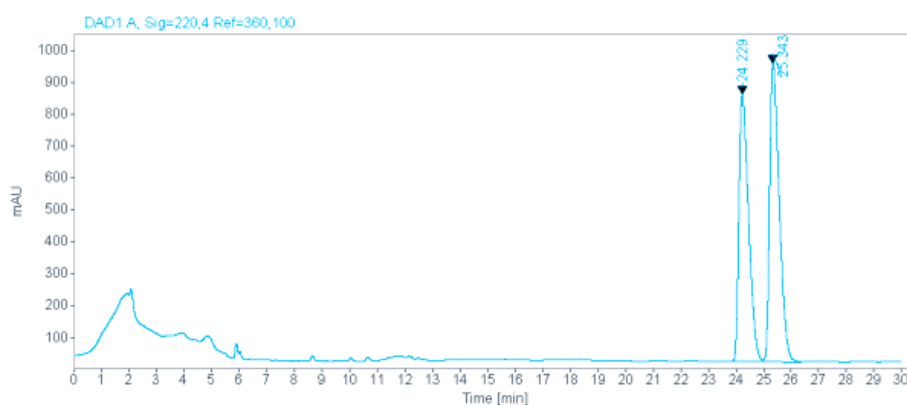

**Signal:** DAD1 A, Sig=220,4 Ref=360,100

| RT [min] | Type | Width [min] | Area       | Height   | Area%   | Name |
|----------|------|-------------|------------|----------|---------|------|
| 24.229   | MM   | 0.4034      | 20262.0078 | 837.0413 | 47.2880 |      |
| 25.343   | MM   | 0.4032      | 22586.0664 | 933.6463 | 52.7120 |      |
|          |      | Sum         | 42848.0742 |          |         |      |

### 6.2.9 Entry 9

# Single Injection Report



Agilent Technologies

Data file: C:\Data\Felix\Induktion\_neuerKat\_221\FK221-45.D

Sample name: FK221-45

Description: FK221-46 BINOL-Kat.

Instrument: LC1260

Injection date: 12/17/2018 6:15:56 PM

Acq. method: 10\_90.1\_1.0\_25\_IDM

Analysis method: 10\_90.1\_1.0\_25\_IDM

Last changed: 6/5/2018 5:13:20 PM

Column name:

Serial #:

Injection volume: 10.000

Acq. operator: SYSTEM

Sample type: Sample

Dilution: 1

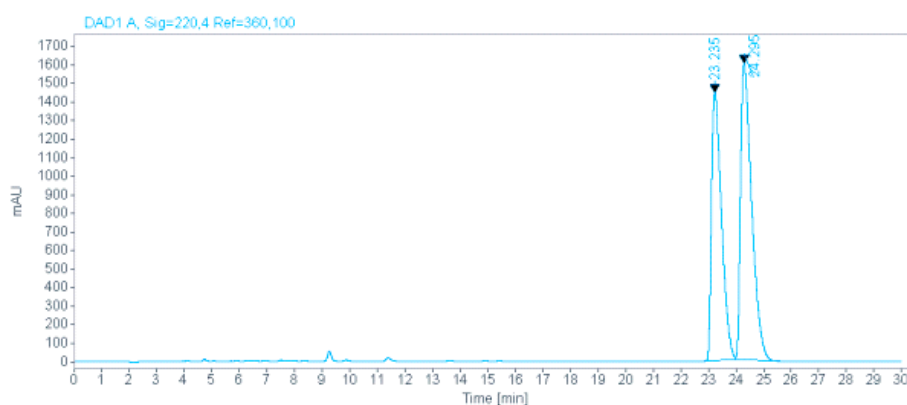

Signal: DAD1 A, Sig=220,4 Ref=360,100

| RT [min] | Type | Width [min] | Area       | Height    | Area%   | Name |
|----------|------|-------------|------------|-----------|---------|------|
| 23.235   | MM   | 0.4202      | 36434.2930 | 1445.1360 | 44.9293 |      |
| 24.295   | MM   | 0.4658      | 44658.2227 | 1597.7968 | 55.0707 |      |
| Sum      |      |             | 81092.5156 |           |         |      |

## 6.2.10 Entry 10

### Single Injection Report

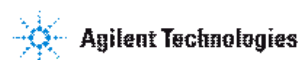

**Data file:** C:\Data\Felb\Induktion\_neuerKat\_221\iso-918 2018-05-16 17-36-03\FK221-23.D  
**Sample name:** FK221-23  
**Description:**  
**Instrument:** LC1260  
**Injection date:** 5/16/2018 5:38:12 PM  
**Acq. method:** 10\_90.1\_1.0\_25\_ID.M  
**Analysis method:** 10\_90.1\_1.0\_25\_ID.M  
**Last changed:** 9/16/2016 3:57:01 PM  
**Column name:** CHIRALPAK ID-3  
**Serial #:** 555

**Injection volume:** 10.000  
**Acq. operator:** SYSTEM  
**Sample type:** Sample  
**Dilution:** 1

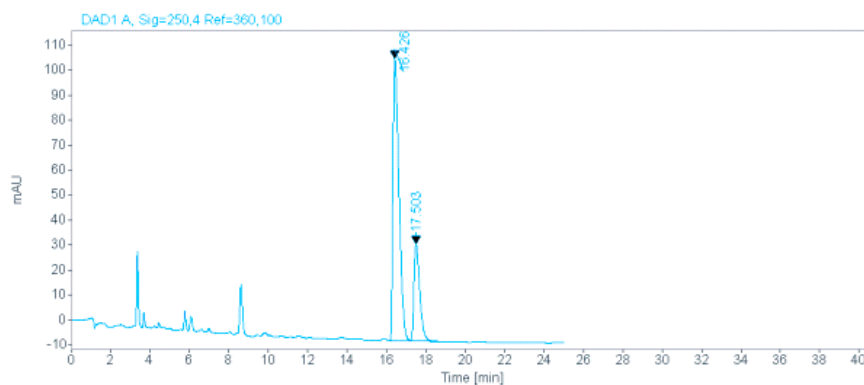

Signal: DAD1 A, Sig=250,4 Ref=360,100

| RT [min] | Type | Width [min] | Area      | Height   | Area%   | Name |
|----------|------|-------------|-----------|----------|---------|------|
| 16.426   | BV   | 0.3317      | 2397.2534 | 112.9012 | 74.7810 |      |
| 17.503   | VB   | 0.3170      | 808.4459  | 38.8092  | 25.2190 |      |
| Sum      |      |             | 3205.6993 |          |         |      |

### 6.2.11 Entry 11

# Single Injection Report



Agilent Technologies

Data file: C:\Data\Felix\Induktion\_neuerKat\_221\FK221-24.D

Sample name: FK221-24

Description: FK221-24\_DiPhenylmethyl

Instrument: LC1260

Injection date: 5/24/2018 3:12:35 PM

Acq. method: 10\_90.1\_1.0\_25\_IDM

Analysis method: 10\_90.1\_1.0\_25\_IDM

Last changed: 6/5/2018 5:13:20 PM

Column name: CHIRALPAK ID-3

Serial #: 555

Injection volume: 10.000

Acq. operator: SYSTEM

Sample type: Sample

Dilution: 1

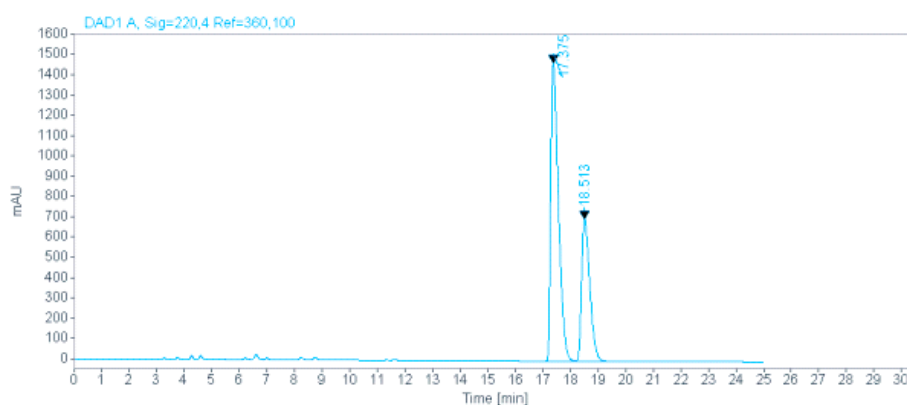

Signal: DAD1 A, Sig=220,4 Ref=360,100

| RT [min] | Type | Width [min] | Area       | Height    | Area%   | Name |
|----------|------|-------------|------------|-----------|---------|------|
| 17.375   | BV   | 0.2983      | 28718.0859 | 1467.6029 | 66.4654 |      |
| 18.513   | VB   | 0.3197      | 14489.4551 | 699.3735  | 33.5346 |      |
| Sum      |      |             | 43207.5410 |           |         |      |

### 6.2.12 Entry 12

# Single Injection Report



Agilent Technologies

Data file: C:\Data\Felix\Induktion\_neuerKat\_221\FK221-25.D

Sample name: FK221-25

Description: FK221-25\_DiPhenylmethyl\_Maruoka Cond

Instrument: LC1260

Injection date: 5/25/2018 5:02:13 PM

Acq. method: 10\_90.1\_1.0\_25\_ID.M

Analysis method: 10\_90.1\_1.0\_25\_ID.M

Last changed: 6/5/2018 5:13:20 PM

Column name: CHIRALPAK ID-3

Serial #: 555

Injection volume: 10.000

Acq. operator: SYSTEM

Sample type: Sample

Dilution: 1

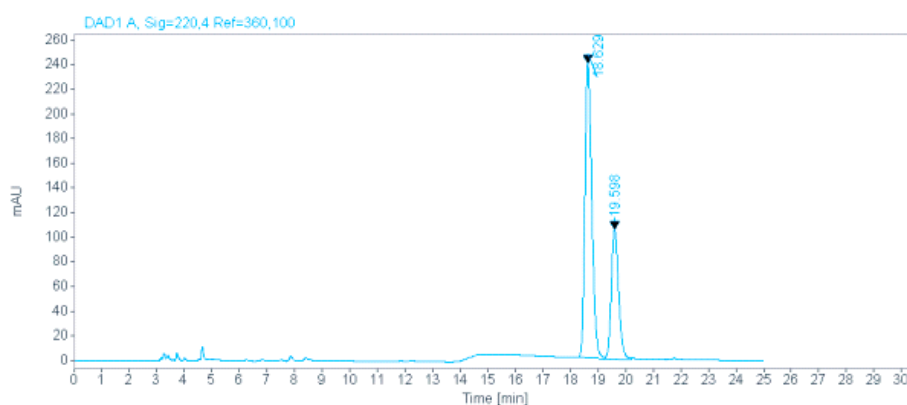

Signal: DAD1 A, Sig=220,4 Ref=360,100

| RT [min] | Type | Width [min] | Area      | Height   | Area%   | Name |
|----------|------|-------------|-----------|----------|---------|------|
| 18.629   | MM   | 0.2907      | 4160.9102 | 238.5581 | 68.2703 |      |
| 19.598   | MM   | 0.3081      | 1933.8499 | 104.6171 | 31.7297 |      |
| Sum      |      |             | 6094.7600 |          |         |      |

### 6.2.13 Entry 13

# Single Injection Report



Agilent Technologies

Data file: C:\Data\Felix\Induktion\_neuerKat\_221\FK221-26.D

Sample name: FK221-24

Description: FK221-26\_DiPhenylmethyl\_PhMe

Instrument: LC1260

Injection date: 5/25/2018 3:21:05 PM

Acq. method: 10\_90.1\_1.0\_25\_ID.M

Analysis method: 10\_90.1\_1.0\_25\_ID.M

Last changed: 6/5/2018 5:13:20 PM

Column name: CHIRALPAK ID-3

Serial #: 555

Injection volume: 10.000

Acq. operator: SYSTEM

Sample type: Sample

Dilution: 1

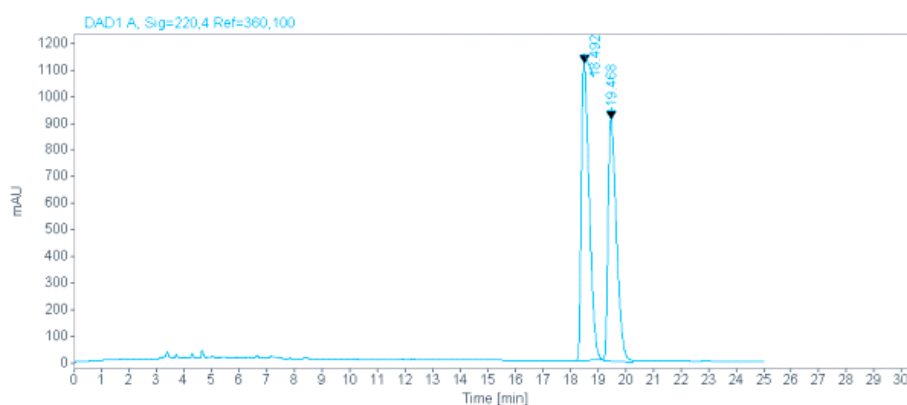

Signal: DAD1 A, Sig=220,4 Ref=360,100

| RT [min] | Type | Width [min] | Area       | Height    | Area%   | Name |
|----------|------|-------------|------------|-----------|---------|------|
| 18.492   | MM   | 0.3337      | 22314.7383 | 1114.5094 | 53.7668 |      |
| 19.468   | MM   | 0.3526      | 19188.0918 | 906.8666  | 46.2332 |      |
| Sum      |      |             | 41502.8301 |           |         |      |

#### 6.2.14 Entry 14

# Single Injection Report



Agilent Technologies

**Data file:** C:\Data\Felix\Induktion\_neuerKat\_221\FK221-27.D  
**Sample name:** FK221-27  
**Description:** FK221-27\_DiPhenylmethyl\_Lange\_Bestrahlung  
**Instrument:** LC1260  
**Injection date:** 5/28/2018 4:49:10 PM  
**Acq. method:** 10\_90.1\_1.0\_25\_ID.M  
**Analysis method:** 10\_90.1\_1.0\_25\_ID.M  
**Last changed:** 6/5/2018 5:13:20 PM  
**Column name:** CHIRALPAK ID-3  
**Serial #:** 555  
**Injection volume:** 10.000  
**Acq. operator:** SYSTEM  
**Sample type:** Sample  
**Dilution:** 1

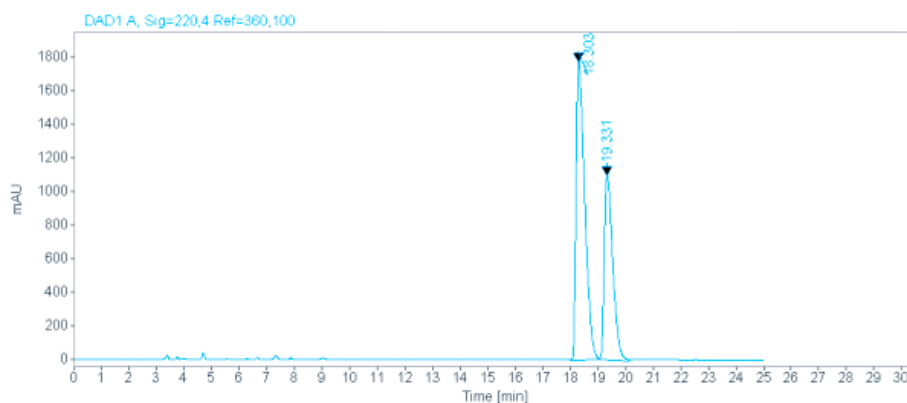

Signal: DAD1 A, Sig=220,4 Ref=360,100

| RT [min] | Type | Width [min] | Area       | Height    | Area%   | Name |
|----------|------|-------------|------------|-----------|---------|------|
| 18.303   | MM   | 0.3625      | 38601.9414 | 1774.8201 | 62.1891 |      |
| 19.331   | MM   | 0.3560      | 23469.9395 | 1098.8024 | 37.8109 |      |
| Sum      |      |             | 62071.8809 |           |         |      |

### 6.2.15 Entry 15

# Single Injection Report



Agilent Technologies

**Data file:** C:\Data\Felix\Induktion\_neuerKat\_221\FK221-29.D  
**Sample name:** FK221-27  
**Description:** FK221-27\_DiPhenylmethyl\_MeCN\_6h  
**Instrument:** LC1260  
**Injection date:** 5/31/2018 1:41:51 PM  
**Acq. method:** 10\_90.1\_1.0\_25\_ID.M  
**Analysis method:** 10\_90.1\_1.0\_25\_ID.M  
**Last changed:** 6/5/2018 5:13:20 PM  
**Column name:** CHIRALPAK ID-3  
**Serial #:** 555  
**Injection volume:** 10.000  
**Acq. operator:** SYSTEM  
**Sample type:** Sample  
**Dilution:** 1

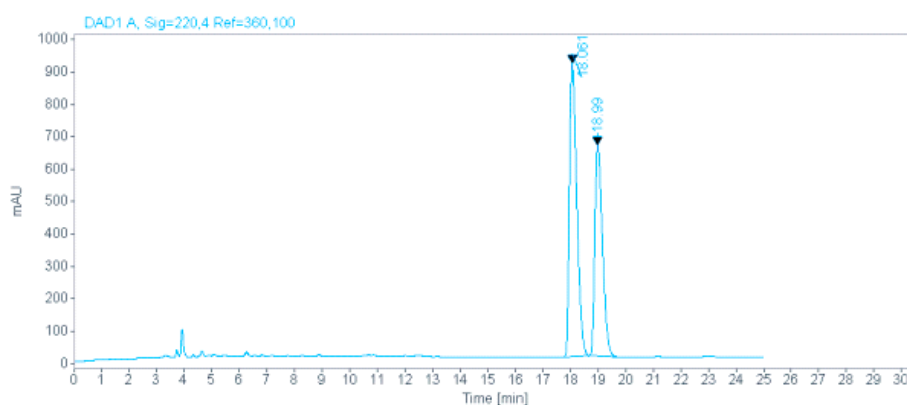

Signal: DAD1 A, Sig=220,4 Ref=360,100

| RT [min] | Type | Width [min] | Area       | Height   | Area%   | Name |
|----------|------|-------------|------------|----------|---------|------|
| 18.061   | MM   | 0.3098      | 16799.9395 | 903.8807 | 57.3758 |      |
| 18.990   | MM   | 0.3194      | 12480.6104 | 651.3352 | 42.6242 |      |
| Sum      |      |             | 29280.5498 |          |         |      |

### 6.2.16 Entry 16

# Single Injection Report



Agilent Technologies

Data file: C:\Data\Felix\Induktion\_neuerKat\_221\FK221-30.D

Sample name: FK221-30

Description: FK221-30\_Tiefe Temperatur

Instrument: LC1260

Injection date: 6/5/2018 2:52:27 PM

Acq. method: 10\_90.1\_1.0\_25\_IDM

Analysis method: 10\_90.1\_1.0\_25\_IDM

Last changed: 6/5/2018 5:13:20 PM

Column name: CHIRALPAK ID-3

Serial #: 555

Injection volume: 10.000

Acq. operator: SYSTEM

Sample type: Sample

Dilution: 1

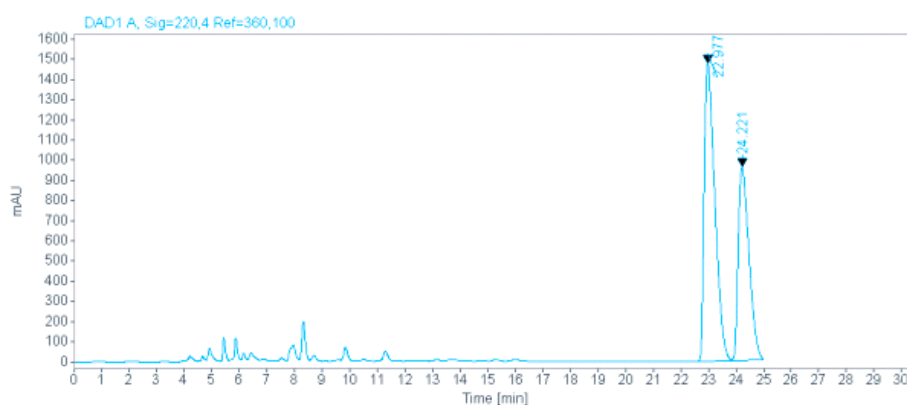

Signal: DAD1 A, Sig=220,4 Ref=360,100

| RT [min] | Type | Width [min] | Area       | Height    | Area%   | Name |
|----------|------|-------------|------------|-----------|---------|------|
| 22.977   | BV   | 0.4129      | 39589.2891 | 1475.9030 | 60.4868 |      |
| 24.221   | VBA  | 0.4172      | 25861.8711 | 957.3465  | 39.5132 |      |
| Sum      |      |             | 65451.1602 |           |         |      |

### 6.2.17 Entry 19

# Single Injection Report



Agilent Technologies

Data file: C:\Data\Felix\Induktion\_neuerKat\_221\FK221-34.D

Sample name: FK221-34

Description: FK221-34\_FK431-Ru

Instrument: LC1260

Injection date: 6/8/2018 3:41:57 PM

Acq. method: 10\_90.1\_1.0\_25\_ID.M

Analysis method: 10\_90.1\_1.0\_25\_ID.M

Last changed: 6/5/2018 5:13:20 PM

Column name: CHIRALPAK ID-3

Serial #: 555

Injection volume: 10.000

Acq. operator: SYSTEM

Sample type: Sample

Dilution: 1

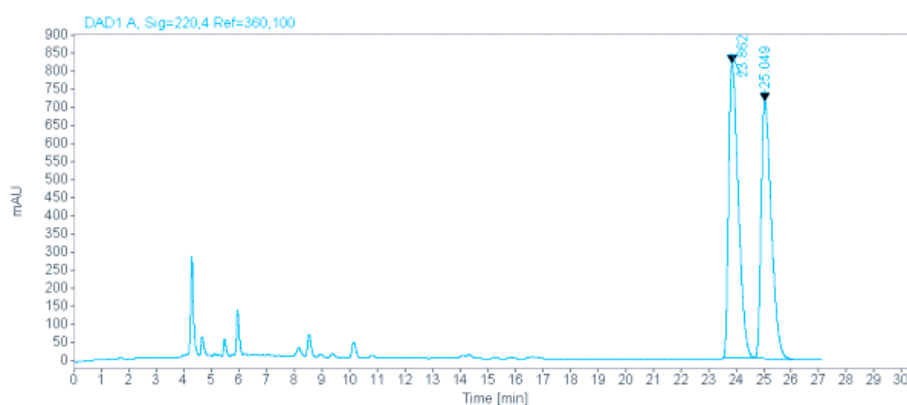

Signal: DAD1 A, Sig=220,4 Ref=360,100

| RT [min] | Type | Width [min] | Area       | Height   | Area%   | Name |
|----------|------|-------------|------------|----------|---------|------|
| 23.862   | MM   | 0.4080      | 19926.8262 | 813.9940 | 52.1906 |      |
| 25.049   | MM   | 0.4278      | 18254.0508 | 711.2316 | 47.8094 |      |
| Sum      |      |             | 38180.8770 |          |         |      |

### 6.2.18 Entry 20

# Single Injection Report



Agilent Technologies

**Data file:** C:\Data\Felix\Induktion\_neuerKat\_221\FK221-34\_BPh4.D  
**Sample name:** FK221-34  
**Description:** FK221-34\_FK431-PyrrOMeBPh4  
**Instrument:** LC1260  
**Injection date:** 6/13/2018 4:42:17 PM  
**Acq. method:** 10\_90.1\_1.0\_25\_IDM  
**Analysis method:** 10\_90.1\_1.0\_25\_IDM  
**Last changed:** 6/5/2018 5:13:20 PM  
**Column name:** CHIRALPAK ID-3  
**Serial #:** 555

**Injection volume:** 10.000  
**Acq. operator:** SYSTEM  
**Sample type:** Sample  
**Dilution:** 1

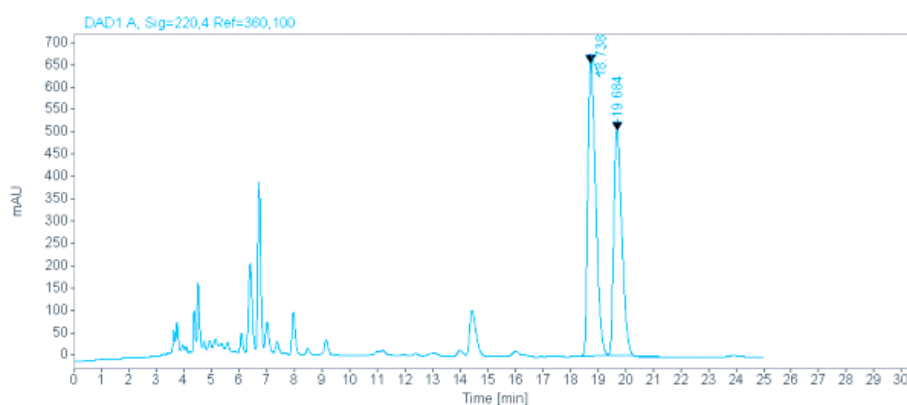

**Signal:** DAD1 A, Sig=220,4 Ref=360,100

| RT [min] | Type | Width [min] | Area       | Height   | Area%   | Name |
|----------|------|-------------|------------|----------|---------|------|
| 18.738   | MM   | 0.3314      | 13023.4590 | 654.9884 | 55.8723 |      |
| 19.684   | MM   | 0.3406      | 10285.8906 | 503.2816 | 44.1277 |      |
| Sum      |      |             | 23309.3496 |          |         |      |

### 6.2.19 Entry 21

# Single Injection Report



Agilent Technologies

**Data file:** C:\Data\Felix\Induktion\_neuerKat\_221\FK221-35\_BPh4\_dry.D  
**Sample name:** FK221-35  
**Description:** FK221-35\_FK431-PyrrOMeBPh4\_dry  
**Instrument:** LC1260  
**Injection date:** 6/13/2018 5:28:30 PM  
**Acq. method:** 10\_90.1\_1.0\_25\_IDM  
**Analysis method:** 10\_90.1\_1.0\_25\_IDM  
**Last changed:** 6/5/2018 5:13:20 PM  
**Column name:** CHIRALPAK ID-3  
**Serial #:** 555  
**Injection volume:** 10.000  
**Acq. operator:** SYSTEM  
**Sample type:** Sample  
**Dilution:** 1

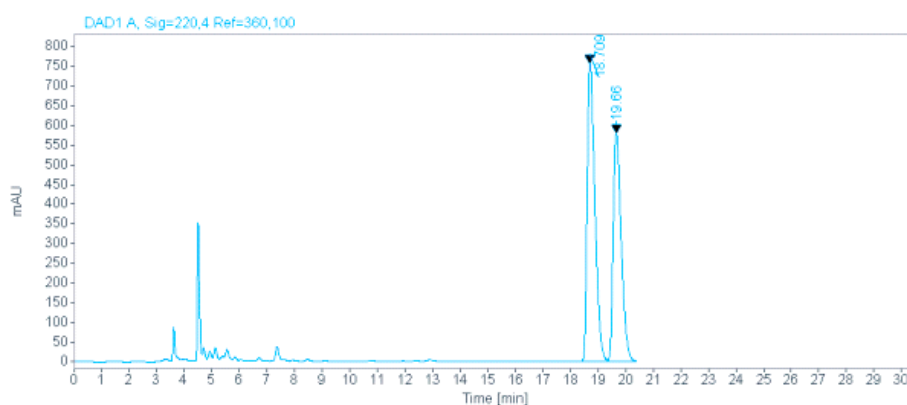

Signal: DAD1 A, Sig=220,4 Ref=360,100

| RT [min] | Type | Width [min] | Area       | Height   | Area%   | Name |
|----------|------|-------------|------------|----------|---------|------|
| 18.709   | BV   | 0.3018      | 14767.6328 | 756.3871 | 55.7442 |      |
| 19.660   | VBA  | 0.3119      | 11724.1719 | 579.9187 | 44.2558 |      |
| Sum      |      |             | 26491.8047 |          |         |      |

### 6.2.20 Entry 22

# Single Injection Report



Agilent Technologies

Data file: C:\Data\Felix\Induktion\_neuerKat\_221\FK221-36.D

Sample name: FK221-36

Description: FK221-36\_FK431\_dry\_conditions

Instrument: LC1260

Injection date: 6/14/2018 3:13:10 PM

Acq. method: 10\_90.1\_1.0\_25\_ID.M

Analysis method: 10\_90.1\_1.0\_25\_ID.M

Last changed: 6/5/2018 5:13:20 PM

Column name: CHIRALPAK ID-3

Serial #: 555

Injection volume: 10.000

Acq. operator: SYSTEM

Sample type: Sample

Dilution: 1

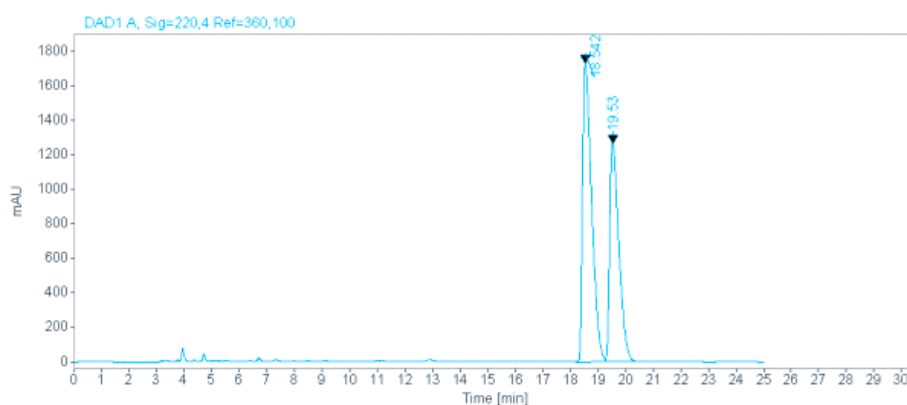

Signal: DAD1 A, Sig=220,4 Ref=360,100

| RT [min] | Type | Width [min] | Area       | Height    | Area%   | Name |
|----------|------|-------------|------------|-----------|---------|------|
| 18.542   | MM   | 0.3844      | 39879.4492 | 1729.0916 | 57.8361 |      |
| 19.530   | MM   | 0.3840      | 29073.1152 | 1261.9829 | 42.1639 |      |
| Sum      |      |             | 68952.5645 |           |         |      |

### 6.2.21 Entry 24

# Single Injection Report



Agilent Technologies

Data file: C:\Data\Katha\RW-6-FR7-8.D  
 Sample name: RW-6-FR7-8  
 Description: RW-6-FR7-8  
 Instrument: LC1260  
 Injection date: 3/15/2018 3:20:59 PM  
 Acq. method: 10\_90.1\_1.0\_25\_ID.M  
 Analysis method: 10\_99.5\_0.8\_20\_OD.M  
 Last changed: 2/28/2018 2:20:13 PM  
 Column name: CHIRALPAK ID-3  
 Serial #: 555

Injection volume: 10.000  
 Acq. operator: SYSTEM  
 Sample type: Sample  
 Dilution: 1

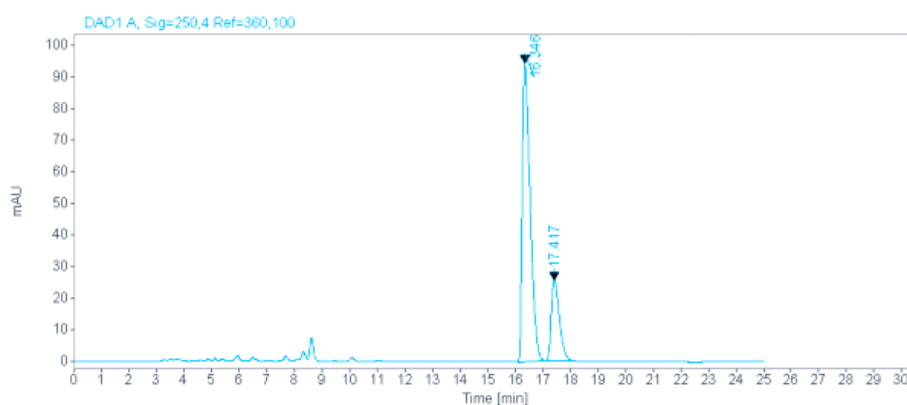

Signal: DAD1 A, Sig=250,4 Ref=360,100

| RT [min] | Type | Width [min] | Area      | Height  | Area%   | Name |
|----------|------|-------------|-----------|---------|---------|------|
| 16.346   | MM   | 0.3293      | 1865.0796 | 94.3985 | 77.9581 |      |
| 17.417   | MM   | 0.3435      | 527.3024  | 25.5813 | 22.0409 |      |
| Sum      |      |             | 2392.3820 |         |         |      |

### 6.2.22 Entry 26

# Single Injection Report



Agilent Technologies

**Data file:** C:\Data\Felix\Induktion\_neuerKat\_221\FK221-13\_Maruoka\_0°C.D  
**Sample name:** CD-3290J-III  
**Description:** 10\_90.1\_1.0\_25\_ID FK221-13\_Maruoka\_0°C  
**Instrument:** LC1260  
**Injection date:** 9/16/2016 3:59:29 PM  
**Acq. method:** 10\_90.1\_1.0\_25\_ID.M  
**Analysis method:** 10\_90.1\_1.0\_25\_ID.M  
**Last changed:** 6/5/2018 5:13:20 PM  
**Column name:** CHIRALPAK ID-3  
**Serial #:** 555  
**Injection volume:** 10.000  
**Acq. operator:** SYSTEM  
**Sample type:** Sample  
**Dilution:** 1

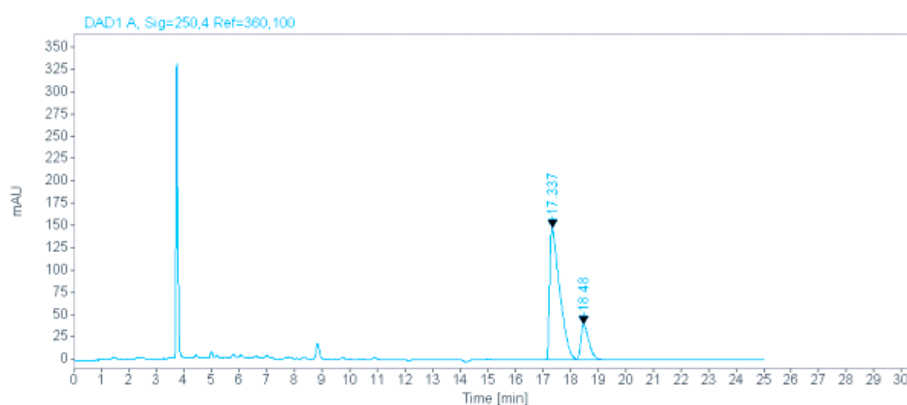

Signal: DAD1 A, Sig=250,4 Ref=360,100

| RT [min] | Type | Width [min] | Area      | Height   | Area%   | Name |
|----------|------|-------------|-----------|----------|---------|------|
| 17.337   | MM   | 0.4216      | 3744.0320 | 148.0126 | 82.5616 |      |
| 18.480   | MM   | 0.3366      | 790.8032  | 39.1546  | 17.4384 |      |
| Sum      |      |             | 4534.8352 |          |         |      |

### 6.2.23 Entry 27

# Single Injection Report



Agilent Technologies

**Data file:** C:\Data\Felix\Induktion\_neuerKat\_221\FK221-14\_Maruoka\_0°C.D  
**Sample name:** FK221-14\_Maruoka\_0°C  
**Description:** 10\_90.1\_1.0\_25\_IDFK221-14\_Maruoka\_0°C  
**Instrument:** LC1260  
**Injection date:** 9/19/2016 4:00:16 PM  
**Acq. method:** 10\_90.1\_1.0\_25\_IDM  
**Analysis method:** 10\_90.1\_1.0\_25\_IDM  
**Last changed:** 6/5/2018 5:13:20 PM  
**Column name:** CHIRALPAK ID-3  
**Serial #:** 555  
**Injection volume:** 10.000  
**Acq. operator:** SYSTEM  
**Sample type:** Sample  
**Dilution:** 1

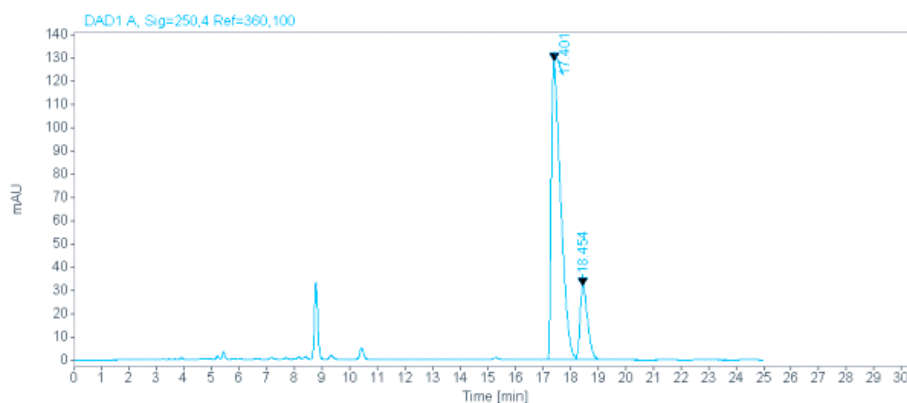

Signal: DAD1 A, Sig=250,4 Ref=360,100

| RT [min] | Type | Width [min] | Area      | Height   | Area%   | Name |
|----------|------|-------------|-----------|----------|---------|------|
| 17.401   | BV   | 0.3529      | 3043.9487 | 128.2518 | 83.1920 |      |
| 18.454   | VB   | 0.3006      | 614.9948  | 31.6648  | 16.8080 |      |
| Sum      |      |             | 3658.9435 |          |         |      |

#### 6.2.24 Entry 31

# Single Injection Report



Agilent Technologies

**Data file:** C:\Data\Felix\Induktion\_neuerKat\_221\FK221-19\_NOBF4\_Maruoka.D  
**Sample name:** FK221-19  
**Description:** FK221-19\_NOBF4\_Maruoka  
**Instrument:** LC1260  
**Injection date:** 6/12/2017 3:47:25 PM  
**Acq. method:** 10\_90.1\_1.0\_25\_IDM  
**Analysis method:** 10\_90.1\_1.0\_25\_IDM  
**Last changed:** 6/5/2018 5:13:20 PM  
**Column name:** CHIRALPAK ID-3  
**Serial #:** 555  
**Injection volume:** 10.000  
**Acq. operator:** SYSTEM  
**Sample type:** Sample  
**Dilution:** 1

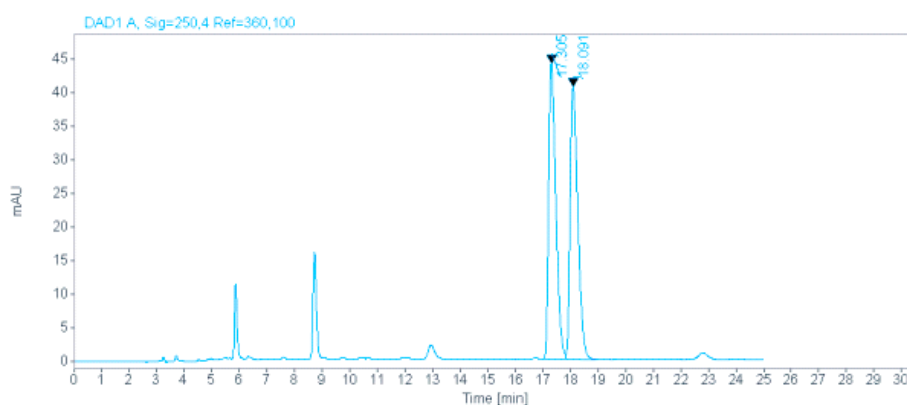

Signal: DAD1 A, Sig=250,4 Ref=360,100

| RT [min] | Type | Width [min] | Area      | Height  | Area%   | Name |
|----------|------|-------------|-----------|---------|---------|------|
| 17.305   | MM   | 0.3036      | 800.9833  | 43.9698 | 50.3888 |      |
| 18.091   | MM   | 0.3241      | 788.6212  | 40.5596 | 49.6112 |      |
| Sum      |      |             | 1589.6045 |         |         |      |

### 6.2.25 Entry 32

# Single Injection Report



Agilent Technologies

Data file: C:\Data\Felix\Induktion\_neuerKat\_221\FK221-43.D

Sample name: FK221-43

Description: FK221-43 Diselenocin Acetal

Instrument: LC1260

Injection date: 12/14/2018 4:28:34 PM

Acq. method: 10\_90.1\_1.0\_25\_IDM

Analysis method: 10\_90.1\_1.0\_25\_IDM

Last changed: 6/5/2018 5:13:20 PM

Column name: CHIRALPAK ID-3

Serial #: 555

Injection volume: 10.000

Acq. operator: SYSTEM

Sample type: Sample

Dilution: 1

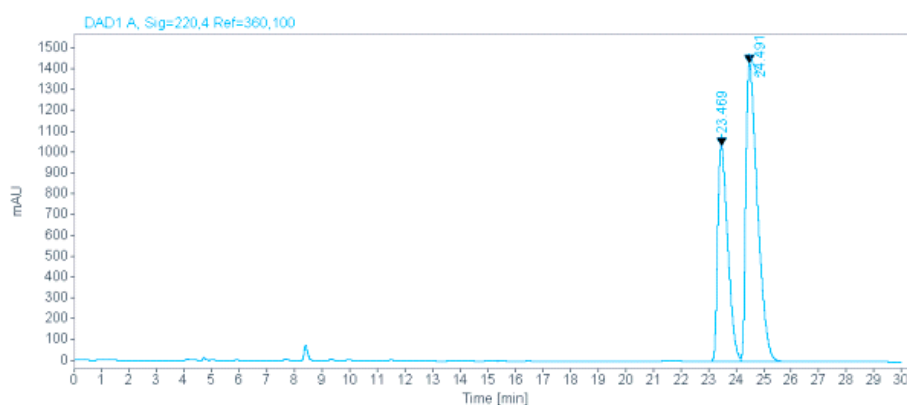

Signal: DAD1 A, Sig=220,4 Ref=360,100

| RT [min] | Type | Width [min] | Area       | Height    | Area%   | Name |
|----------|------|-------------|------------|-----------|---------|------|
| 23.469   | MM   | 0.4227      | 26266.6113 | 1035.7816 | 38.5517 |      |
| 24.491   | MM   | 0.4878      | 41866.8594 | 1430.5667 | 61.4483 |      |
|          |      | Sum         | 68133.4707 |           |         |      |

### 6.2.26 Entry 33

# Single Injection Report



Agilent Technologies

**Data file:** C:\Data\Felix\Induktion\_neuerKat\_221\FK221-44.D  
**Sample name:** FK221-44  
**Description:** FK221-44 Diselenocin Carbonat  
**Instrument:** LC1260  
**Injection date:** 12/14/2018 5:12:58 PM  
**Acq. method:** 10\_90.1\_1.0\_25\_IDM  
**Analysis method:** 10\_90.1\_1.0\_25\_IDM  
**Last changed:** 6/5/2018 5:13:20 PM  
**Column name:** CHIRALPAK ID-3  
**Serial #:** 555

**Injection volume:** 10.000  
**Acq. operator:** SYSTEM  
**Sample type:** Sample  
**Dilution:** 1

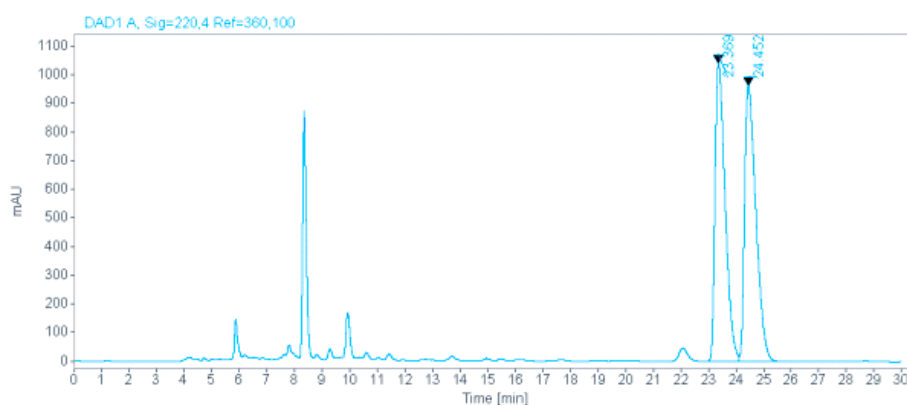

**Signal:** DAD1 A, Sig=220,4 Ref=360,100

| RT [min] | Type | Width [min] | Area       | Height    | Area%   | Name |
|----------|------|-------------|------------|-----------|---------|------|
| 23.369   | BV   | 0.3969      | 26648.8867 | 1040.2244 | 49.2414 |      |
| 24.452   | VB   | 0.4365      | 27470.0293 | 963.8536  | 50.7586 |      |
| Sum      |      |             | 54118.9160 |           |         |      |
